## Exploring genes of rectal cancer for new treatments based on protein interaction network

Running Title: protein interaction network of rectal cancer

Wenjing Teng<sup>1</sup>, Chao Zhou<sup>2</sup>, Yan Li<sup>1\*</sup>

1 .Department of oncology, Shanghai Municipal Hospital of Traditional Chinese Medicine ,Affiliated to Shanghai University of Traditional Chinese Medicine, Zhijiang road 274 , Shanghai 200041,China.2.Department of oncology, Weifang Traditional Chinese Medicine Hospital,Kuiwen District, Weifang , Shandong Province 261041, China;

**\*Corresponding author: E-mail : 18916767226@163.com.**

Abstract

**Objective:** To develop a protein-protein interaction network of rectal cancer, which is based on genetic genes as well as to predict biological pathways underlying the molecular complexes in the network. In order to analyze and summarize genetic markers related to diagnosis and prognosis of rectal cancer.

**Methods:** the genes expression profile was downloaded from OMIM (Online Mendelian Inheritance in Man) database; the protein-protein interaction network of rectal cancer was established by Cytoscape; the molecular complexes in the network were detected by Clusterviz plugin and the pathways enrichment of molecular complexes were performed by DAVID online and Bingo (The Biological Networks Gene Ontology tool).

**Results and Discussion:** A total of 127 rectal cancer genes were identified to differentially express in OMIM Database. The protein-protein interaction network of rectal cancer was contained 966 nodes (proteins), 3377 edges (interactive relationships) and 7 molecular complexes (score>7.0). Regulatory effects of genes and proteins were focused on cell cycle, transcription regulation and cellular protein metabolic process. Genes of *DDK1*, *sparcl1*, *wisp2*, *cux1*, *pabpc1*, *ptk2* and *htral* were significant nodes in PPI network. The discovery of featured genes which were probably related to rectal cancer, has a great significance on studying mechanism, distinguishing normal and cancer tissues, and exploring new treatments for rectal cancer.

**Keywords:** Protein-protein interaction networks; rectal cancer; molecular complexes; pathway ,

genes

Rectal cancer is one of the common fatal malignant tumors in the world, which is secondly lethal cancer in United States as well as thirdly in Europe. The research has improved systemic treatment, such as micro diagnosis. However, despite advances in detection and care, morbidity and mortality from rectal cancer continues to be high[1]. Early detection and diagnosis can be great significance to reduce mortality and improve prognosis, as well as identify those who were at the highest risk due to improving triage for treatment has the greatest impact on rectal cancers treatment. Studies shown that rectal cancer has a prime paradigm for cancer genetics, which can be prevention by early detection of the pre-disease (neoplastic) state. Therefore, the roles of genetics in rectal cancer have become critical to the missions of disease prevention, early detection and effective treatment.

As report goes, approximately 10% of well defined hereditary rectal cancer has syndromes[2]. Hereditary rectal has some benefits, such as many of it are growing slowly, family members are armed with the knowledge of potential risk of associated carcinomas and empowerment to reduce the disease burden.

A large number of mutation, mismatch, inactivation of tumor suppressor genes and activations of oncogenes are involved in the process of rectal cancer[4]. Up to now, genetic marker of rectal cancer can be summarized by the following six aspects : genomic instability, CpG island methylator phenotype, specific microRNAs, histone modification, gene mutation and protein biomarkers. The protein-protein interaction network which is a model of biological molecular interactions can more clearly show the genes, proteins and pathogenesis in the development process of the disease[5]. These genetic traits may partially explain the geographical variance in rectal cancer incidence and mortality as well as the differences between hereditary and sporadic rectal cancer [6].

## 1 Materials and Methods

**Design:** Study on enrichment of genomic biological pathways.

**Method:**

**Data acquisition:** OMIM(Online Mendelian Inheritance in Man) is a comprehensive, authoritative, daily updated human phenotype database, containing more than 12000 genes of all human genetic diseases, and mainly focusing on hereditary diseases. In addition, text messages, related reference information, sequence records, maps, and related databases are available for each gene[7-8]. This study had started from August 22(2015), searched "rectal cancer" in the OMIM database and obtained human genes associated with rectal cancer information.

**The construction of gene/protein interaction networks:** rectal cancer associated genes were submitted to Cytoscape 3.2.1 plug-in Agilent Literature Search 2.7.7 (USA Agilent Technologies company) and Pubmed [9]. False positive interaction information was removed from retrieval results. Then, gene/protein interaction relations were read in Cytoscape 2.8.2 and visualized [10].

**Network analysis:** MODE algorithm in Cytoscape 3.2.1 web analytics plug-in Clusterviz of 1.2 was administrated to make the correlation analysis for the area of the construction of biological networks [11-12]. By analyzing the network structure, proteins were grouped to form molecular compounds in the entire network and were shown in Cytoscape according to the correlation integral value. The areas with integral value higher than 3 were regarded as molecular compounds. The gene/protein names contained in the molecular compounds were submitted to The Database for Annotation, Visualization and Integrated Discovery. [13-14] By retrieving Kyoto Encyclopedia of Genes and Genomes (KEGG) Database, biological pathways involved in chronic myelogenous leukaemia heredity were identified. Then the Biological pathways data were submitted to **Bingo** (in Networks Gene Ontology tool) for enrichment analysis.

**Main outcome measures:** Protein networks were constructed based on the rectal cancer-related genes, nodes (proteins) and edges (interaction between), molecular complexes in the network and its associated interaction points and nodes (protein) and the edge (interaction between), analyze the biological pathways has involved in the molecular complexes.

## 2 Results

## 2.1 Rectal cancer related genes in OMIM

According to the OMIM database retrieval, it can be found that 127 genes were reported to be associated with rectal cancer. After screening and deleting duplicate genes, 127 related genes were identified, which are shown in **Table 1**.

## 2.2 Protein interaction networks

Through text mining, 127 genetic-related genes were shown that there was a network diagram with 638 nodes (proteins) and 1830 edges. As shown in **Figure 1-3**, the diamond represents OMIM genetic disease related proteins, while the round represents the proteins obtained from text mining.

### **Figure 1(A+B). Network map of protein interaction (Overall)**

As shown in **Figure 1**, the protein-protein interaction network underlying rectal cancer is extremely complex. The edges intersect with each other and several clusters emerge in the figure. The more edges among the genes, the correlation of the genes is more tightening. So the genes formed the round network at the top of **Figure 1** connected with each other more tightly than the genes in the bottom.

### **Figure 2 the relationship of proteins**

After removing the protein molecule in the network, the relationship between proteins in the network became more clear. In the centre part of the protein-protein network, the relationship between protein complexes emerged is closer, however, at the farther edge of the network, the relationship of it became looser, as shown in **Figure 2**.

### **Figure 3(A): pathway jak2-stat1**

### **Figure 3(B): relationship of gene *Kras***

AS shown in **Figure3**, it can be found some common genes and pathways such as jak2-stat1, *Kras*, P53, etc as well as genes associated with them.

#### **2.3 Network topology attribute analysis**

Network topology attribute analysis shown that the connectivity of nodes in the network (the number of nodes in the network) obeys descending distribution, i.e. with the increase of edges connected to the node, correspondingly the number of nodes decrease, so it can be seen that the gene-protein interaction networks are scale-free networks [15]. We found that the connectivity of nodes in the network greater than or equal to 25 corresponds to a sharp reduction in the number of nodes **Figure 4**. Therefore, we regarded the nodes which the connectivity is greater than / equal to 20 as the key nodes (hub). Key nodes (connectivity score) included: *hif1a*(25), *cdkn1b*(25), *rb1*(26), *plau*(26), *brca1*(27), *asns*(28), *pcna*(28), *Vegfa*(29), *stat1*(29), *cdkn2a*(29), *egfr*(30), *tp53*(71).

#### **Figure 4. Connectivity degree of each node and betweenness Comparison**

(The horizontal axis represents betweenness, and the ordinate represents the connectivity degree of protein interaction network. And the graphic in the table represents each node in the network). It can be seen that the connectivity (the number of nodes in the network) of nodes in the network obeys descending distribution, while the connectivity is greater than / equal to 25, the number of nodes corresponding to a sharp decrease.

#### **2.4 The detection of molecular complexes**

According to MCOMD algorithm analysis, analyse the correlation between genes in network and calculate the score, the number of nodes, the number of edges. There is a total of 74 molecular complexes and 7 of them showed correlation integral values higher than 7.0.

## Figure 5.

**Rank1** score20 Node20 Edges190

**Rank2** score20 Node20 Edges190

**Rank3** score14 Node14 Edges91

**Rank4** score11.662 Node78 Edges449

**Rank5** score3.143 Node21 Edges66

**Rank6** score9 Node9 Edges36

**Rank7** score7.673 Node56 Edges221

**Figure 5 Molecular complexes obtained by MCOMD algorithm analysis**

The details of the relationship of proteins in molecular complexes 7 was shown in Figure 6

### **Figure6 the relationship of proteins in molecular complexes 7**

The whole network has a total of six parts, including mitogen-activated protein kinase, Specific microRNAs, SRY-related HMG-box, matrix metalloproteinases, cyclinD.

#### **2.5Molecular complex pathway enrichment**

Submit the 7 names of protein molecule complexes online to obtain the relevant pathways in

**Table 2.** The Protein molecule biological pathways of complexes 1 are not exist, and other complexes contain different pathways. Regulatory effects of genes and proteins mainly focused on cell cycle, transcription regulation, and cellular protein metabolic process.

**Table 2 Enrichment of pathways related to molecular complexes**

Bingo results show the gene oncology hierarchical network to the biological processes, **Figure 7**. The size of the node represents the number of the genes, the depth of the node color represents the P values. Diagrams have presented the main biological processes of cluster 2, 3, 5, containing metabolic regulation, transcriptional regulation, biosynthesis, cell differentiation and gene expression regulation and signal transduction, etc.

### **Figure 7**

**A Bingo results show that the basic structure of the biological cluster 1**

**B Bingo results show that the basic structure of the biological cluster 4**

**C Bingo results show that the basic structure of the biological cluster 6**

**C Bingo results show that the basic structure of the biological cluster 7**

## **3 Discussions**

Based on a large number of research references, the progression of rectal cancer is a multistep process, containing overcome apoptosis, inhibiting senescence (infinite proliferation), secretion proliferation signal itself, not sensitive to growth signals, angiogenesis and invasion, which requires a large number of genes and proteins in action [16]. Genetic markers of rectal cancer can be summarized from the following six aspects: the first part is genomic instability, close to 12-17% of sporadic rectal cancer cases exist with microsatellite instability (MSI). At present, microsatellite instability - high - H (MSI) has become a positive prognosis of rectal cancer patients' overall survival [17]. 50-85% of Rectal cancer patients has chromosome aberration frequency, chromosome instability (CIN+) usually be associated with colorectal cancer patients' overall survival, progression-free survival (PFS) and poor prognosis after 5 - fluorouracil therapy; the second part is CpG island methylator phenotype. Nearly 29.6% of the rectal cancer patients shown CpG island methylation phenotype - high (CIMP - H) [18], however, its value is still in research. Specific microRNAs and histone modification are another two aspects, which mainly associate with colorectal cancer patients' overall survival and progression-free serial, tumor metastasis, local

invasion, tumor volume, tumor staging, treatment results, relapse and drug resistance.

What is more, gene mutations and protein biomarkers have brought a special significance. The APC gene mutant p.D1822V containing homozygous V/V would reduce the risk of rectal cancer[19]. According to the APC (rs565453 y rs1816769) and CTNNB1 (rs229303) gene polymorphisms, the death risk stratification in patients with rectal cancer can be analysed. The APC gene mutant p.I1307K as risk factors of the rectal cancer among Ashkenazi Jewishes has been found[20]. The loss of PTEN gene in 22% of rectal cancer patients has caused no response to the EGFR inhibitors and higher risk of death [21]. And the clinical application of protein molecular markers colorectal cancer mainly included: early diagnosis(hnRNP A1,kininogen-1,adipophilin, Apo AI and C9,OLFM4), Prognosis(SM3,desmin,surviving,hTERT and NM23), Potential therapeutic targets(EB1)[22-23]. Therefore, exploring the protein interaction network of tumors, analysing the characteristics of the protein molecular interaction network, and excavating a variety of signalling pathway and the genes will provide a biological basis for the study of the molecular mechanism of tumor and the further treatment as well.

Bio-molecular network analysis is an important direction of systematic biology research. Large-scale human protein-protein network can provide new insights into protein functions, pathways, molecular machines and functional protein modules [24]. The function of bio-molecular often depends on modularization, the network module is made by a number of nodes in the conjunction of each other and has a stable structure which can often reflect a similar nature between the nodes [25,26]. Analysing the function module is the one of the most common method to analyse biological molecular network. According to 127 genes provided by OMIM, our research has built up protein interaction network of rectal cancer, which contain 996 nodes (proteins), 3377 edges (interaction). Due to the network is very large, the experimental introduced MCOMD algorithm to evaluate the network 's regional integration through the correlation integral. Correlation integral described the proteins associated with the degree in the region. Proteins of the same molecular complex generally have the same biological function, therefore we can discover the unknown gene functions or new molecular functional groups, such as cluster 1.

Gene *DDK1*,*sparcl1*,*wisp2*,*cux1*,*pabpc1*,*ptk2* and *htral1* as the composition members of the



cluster1(score 20) in the centre, have closely relationships with each other as well as other genes. It has reported that the secreted protein acidic and rich in cysteine-like 1 (*sparcl1*) is expressed in various normal tissues and many types of cancers. Another study has shown that marker *sparcl1* was significantly related to the prognosis and clinical pathological features of the CRC patients [27]. *Sparcl1* expression increased with RT and is related to a better prognosis in rectal cancer patients with RT but not in patients without RT. This result may help us to select the patients to the best suited preoperative RT. In the process of rectal cancer, gene WISP2 knockout significantly increased Caco-2 cell invasion and motility. Up-regulation of MMP2, -7 and -9 may indicate that WISP2 regulates invasion and motility through MMPs. Regulation of invasion by WISP2 may involve the WNT signalling pathway[28]. Thus, some studies have identified CUX1 as a pan-driver of tumorigenesis and uncover a potential strategy for treating CUX1-mutant tumors. So from cluster1 we predict the effect of gene Cut1 to rectal cancer may be that CUX1 deficiency activates phosphoinositide 3-kinase (PI3K) signalling through direct transcriptional downregulation of the PI3K inhibitor PIK3IP1 (phosphoinositide-3-kinase interacting protein 1), leading to increased tumor growth and susceptibility to PI3K-AKT inhibition. And we also can forecast a few clones existing in colorectal cancer, containing gene mutation of ptk2, htra1 and PABPC1.

Rectal cancer is demonstrated not simply controlled by a particular gene or signaling pathways, but also by the complex process of network system co-ordinately regulated which consisted of a variety of signalling pathways and multiple genes. In the signalling network, it is likely there is some "key regulatory point". At last, a best understanding of chemotherapy molecular targets allowed the identification of genetic markers that can predict the response and/or the toxicity of anti-cancer drugs used in rectal cancers, which could be helpful in the future to propose for each patient a personalized treatment [29-31]. Mutations that can predict the response of new target therapies such as the inhibitors of the JAK kinase inhibitor AG4 90 in colorectal cancer have also been found and will allow the selection of patients who can have benefit from these new therapeutic drugs. The experiment dig out a variety of signalling pathways and genes which can provide reliable directions for molecular mechanism research of treatment, and it need to be further verified.

## Compliance with Ethical Standards

**Conflict of interest** : We declare that we have no financial and personal relationships with other people or organizations that can inappropriately influence our work, there is no professional or other personal interest of any nature or kind in any product, service and/or company that could be construed as influencing the position presented in, or the review of, the manuscript entitled exploring genes of rectal cancer for new treatments based on protein interaction network

**Ethical approval:** This article does not contain any studies with human participants or animals performed by any of the authors.

## References

1. Spreadborough P, Doran C. The current thinking on colorectal cancer. *J R Nav Med Serv* 2015;101(1):47-54.
2. Stoffel EM, Boland CR. Genetics and Genetic Testing in Hereditary Colorectal Cancer. *Gastroenterology* 2015;pii:S0016-5085(15)01016-1.
3. Schlemper RJ, Dawsey SM, Itabashi M, et al. Differences in diagnostic criteria for esophageal squamous cell carcinoma between Japanese and Western pathologists. *Cancer* 2000 ;88(5):996-1006.
4. Schlüssel AT1, Gagliano RA Jr1, Seto-Donlon S1. The evolution of colorectal cancer genetics-Part 1: from discovery to practice. *J Gastrointest Oncol.* 2014 ;5(5):326-35.
5. Zhou C1, Teng WJ, Yang J, et al. Construction of a protein-protein interaction network for chronic myelocytic leukemia and pathway prediction of molecular complexes. *Asian Pac J Cancer Prev* 2014;15(13):5325-30.
6. Macaron C1, Heald B, Burke CA, et al. Using Genetics to Identify Hereditary Colorectal Polypsis and Cancer Syndromes in Your Patient. *Curr Gastroenterol Rep* 2015 ;17(10):463.
7. Hamosh A, Scott AF, Amberger JS, et al. Online Mendelian Inheritance in Man (OMIM), a

- knowledgebase of human genes and genetic disorders. *Nucleic Acids Res* 2005;33(Database issue):D514-517.
8. Amberger J, Bocchini CA, Scott AF, et al. McKusick's Online Mendelian Inheritance in Man (OMIM). *Nucleic Acids Res* 2009;37(Database issue):D793-796.
9. Vailaya A, Bluvast P, Kincaid R, et al. An architecture for biological information extraction and representation. *Bioinformatics* 2005;21 (4):430-438.
10. Shannon P, Markiel A, Ozier O, et al. Cytoscape: a software environment for integrated models of biomolecular interaction networks. *Genome Res* 2003;13(11):2498-2504.
11. Chen L, Wang H, Zhang L, et al. Uncovering packaging features of co-regulated modules based on human protein interaction and transcriptional regulatory networks. *BMC Bioinformatics*, 2010;11:392.
12. Wu BL, Zhou HY, Lv GQ, et al. Protein-protein Interaction network analyses for elucidating the roles of LOXL2-delta72 in esophageal squamous cell carcinoma. *Asian Pac J Cancer Prev* 2014;15(5): 2345-51.
13. Dennis G Jr, Sherman BT, Hosack DA, et al. DAVID: Database for Annotation, Visualization, and Integrated Discovery[J]. *Genome Biol* 2003;4(5):P3.
14. Huang da W, Sherman BT, Lempicki RA. Systematic and integrative analysis of large gene lists using DAVID bioinformatics resources. *Nat Protoc* 2009;4(1):44-57.
15. Burkard TR, Rix U, Breitwieser FP, Superti-Furga G, Colinge J. A computational approach to analyze the mechanism of action of the kinase inhibitor bafetinib[J]. *PLoS Comput Biol* 2010;6(11):e1001001.
16. Smolle MA<sup>1,2</sup>, Pichler M<sup>1</sup>, Haybaeck J<sup>2</sup>, et al. Genetic markers of recurrence in colorectal cancer. *Pharmacogenomics*. 2015; 12:1-14.
17. Bacher JW<sup>1</sup>, Sievers CK<sup>2</sup>, Albrecht DM<sup>3</sup>, et al. Improved Detection of Microsatellite Instability in Early Colorectal Lesions. *PLoS One* 2015 7;10(8):e0132727.

18. Lee DW, Han SW, Cha Y, Rhee YY, et al. Different prognostic effect of CpG island methylation according to sex in colorectal cancer patients treated with adjuvant FOLFOX. *Clin Epigenetics* 2015;7(1):63.
19. Guerreiro CS1, Cravo ML, Brito M, Vidal PM, et al. The D1822V APC polymorphism interacts with fat, calcium, and fiber intakes in modulating the risk of colorectal cancer in Portuguese persons. *Am J Clin Nutr* 2007;85(6):1592-7.
20. Stern HS1, Viertelhausen S, Hunter AG, et al. APC I1307K increases risk of transition from polyp to colorectal carcinoma in Ashkenazi Jews. *Gastroenterology* 2001;120(2):392-400.
21. Mao C1, Zhou J, Yang Z, Huang Y, et al. KRAS, BRAF and PIK3CA mutations and the loss of PTEN expression in Chinese patients with colorectal cancer. *PLoS One* 2012;7(5):e36653.
22. Cappellani A1, Di Vita M, Zanghi A, et al. Biological and clinical markers in colorectal cancer: state of the art. *Front Biosci (Schol Ed)* 2010;2:422-31.
23. Delektorskaya VV1, Golovkov DA, Kushlinskii NE. Clinical significance of levels of molecular biological markers in zones of invasive front-line of colorectal cancer. *Bull Exp Biol Med* 2008;146(5):616-9.
24. Ryu JY1, Kim HU, Lee SY. Human genes with a greater number of transcript variants tend to show biological features of housekeeping and essential genes. *Mol Biosyst* 2015 Aug 17. [Epub ahead of print]
25. Chen L, Wang H, Zhang L, et al. Uncovering packaging features of co-regulated modules based on human protein interaction and transcriptional regulatory networks[J]. *BMC Bioinformatics* 2010;7(11):392.
26. Kovács IA, Palotai R, Szalay MS, et al. Community Landscapes: An Integrative Approach to Determine Overlapping Network Module Hierarchy, Identify Key Nodes and Predict Network Dynamics[J]. *PLoS One* 2010;5(9): e12528.
27. Yu SJ1, Yu JK, Ge WT, et al. SPARCL1, Shp2, MSH2, E-cadherin, p53, ADCY-2 and M

APK are prognosis-related in colorectal cancer. *World J Gastroenterol* 2011;17(15):2028-36.

28. Frewer KA1, Sanders AJ, Owen S, et al. A role for WISP2 in colorectal cancer cell invasion and motility. *Cancer Genomics Proteomics* 2013;10(4):187-96.

29. Gho Kwang-, Cusick M E, Valle D, et al. The human diseases net work. *P Natl Acad Sci USA* 2007;104(21):8685-90.

30. Yildirim M A, Goh K I, Cusick M E, et al. Drug-target network. *Nat Biotechnol* 2007;25(10):1119-26.

31. Hopkins A L. Network pharmacology: the next paradigm in drug discovery. *Nat Chem Biol* 2008;4(11):682-90.



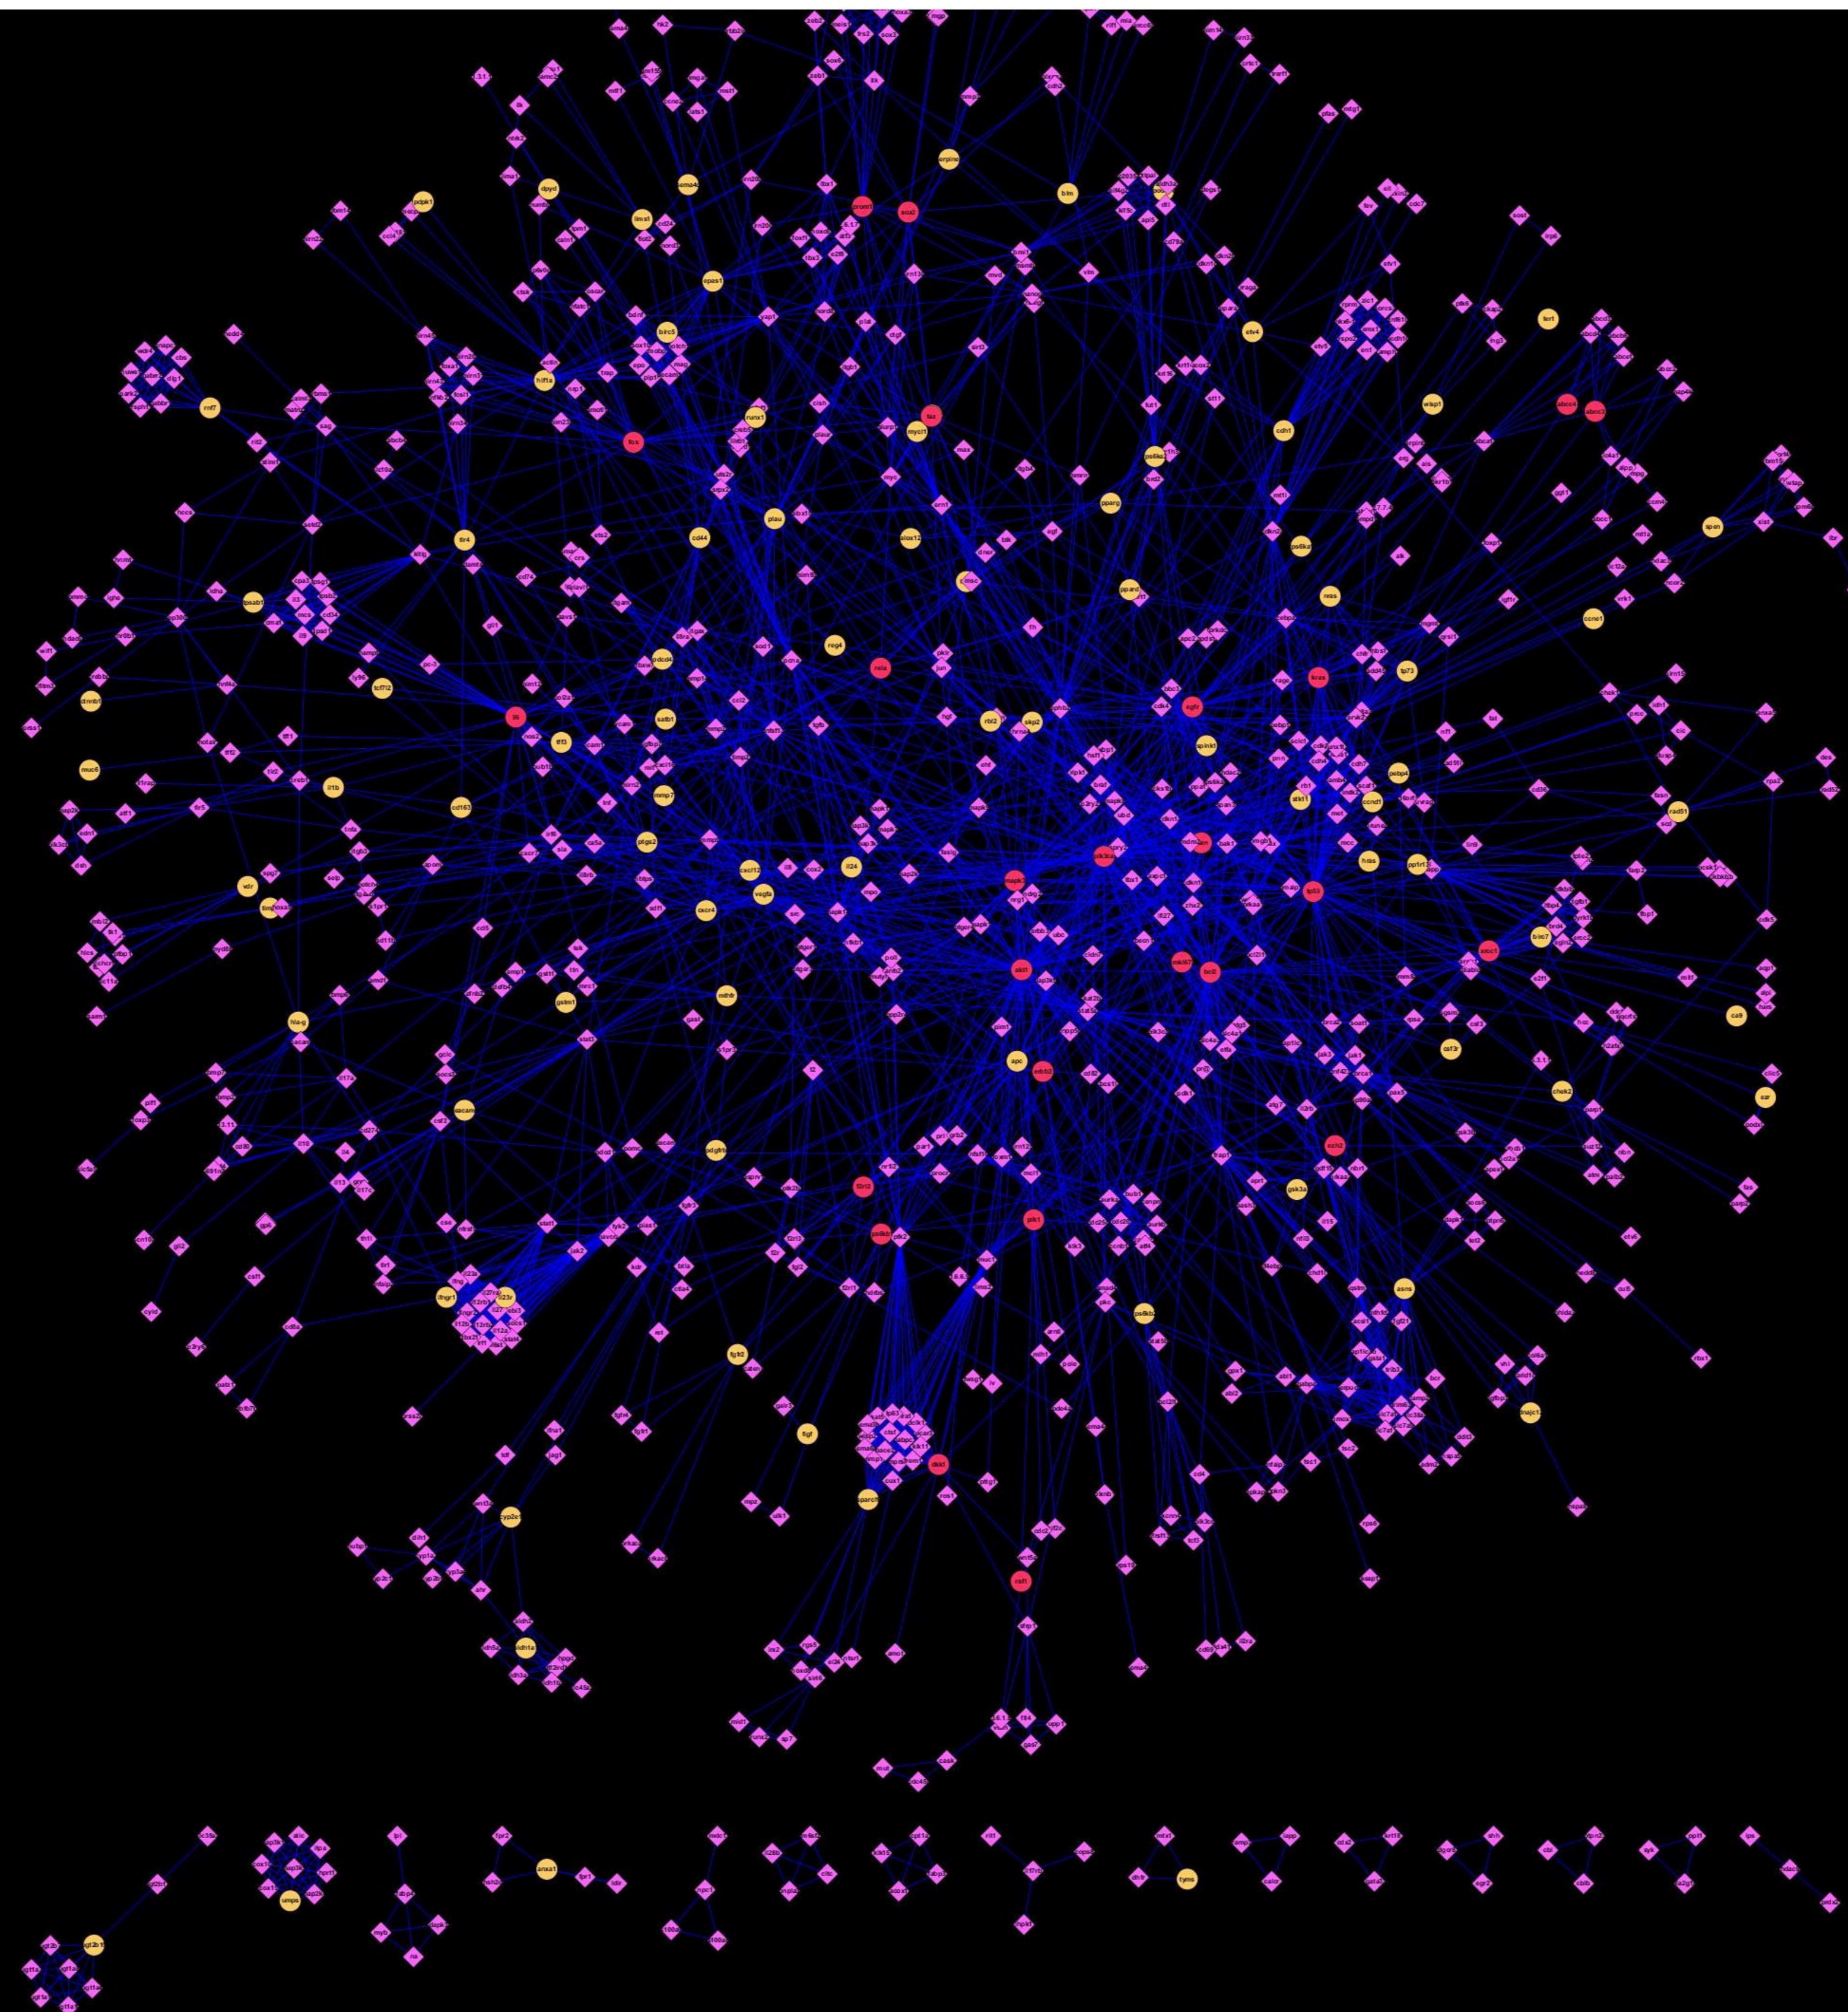

A

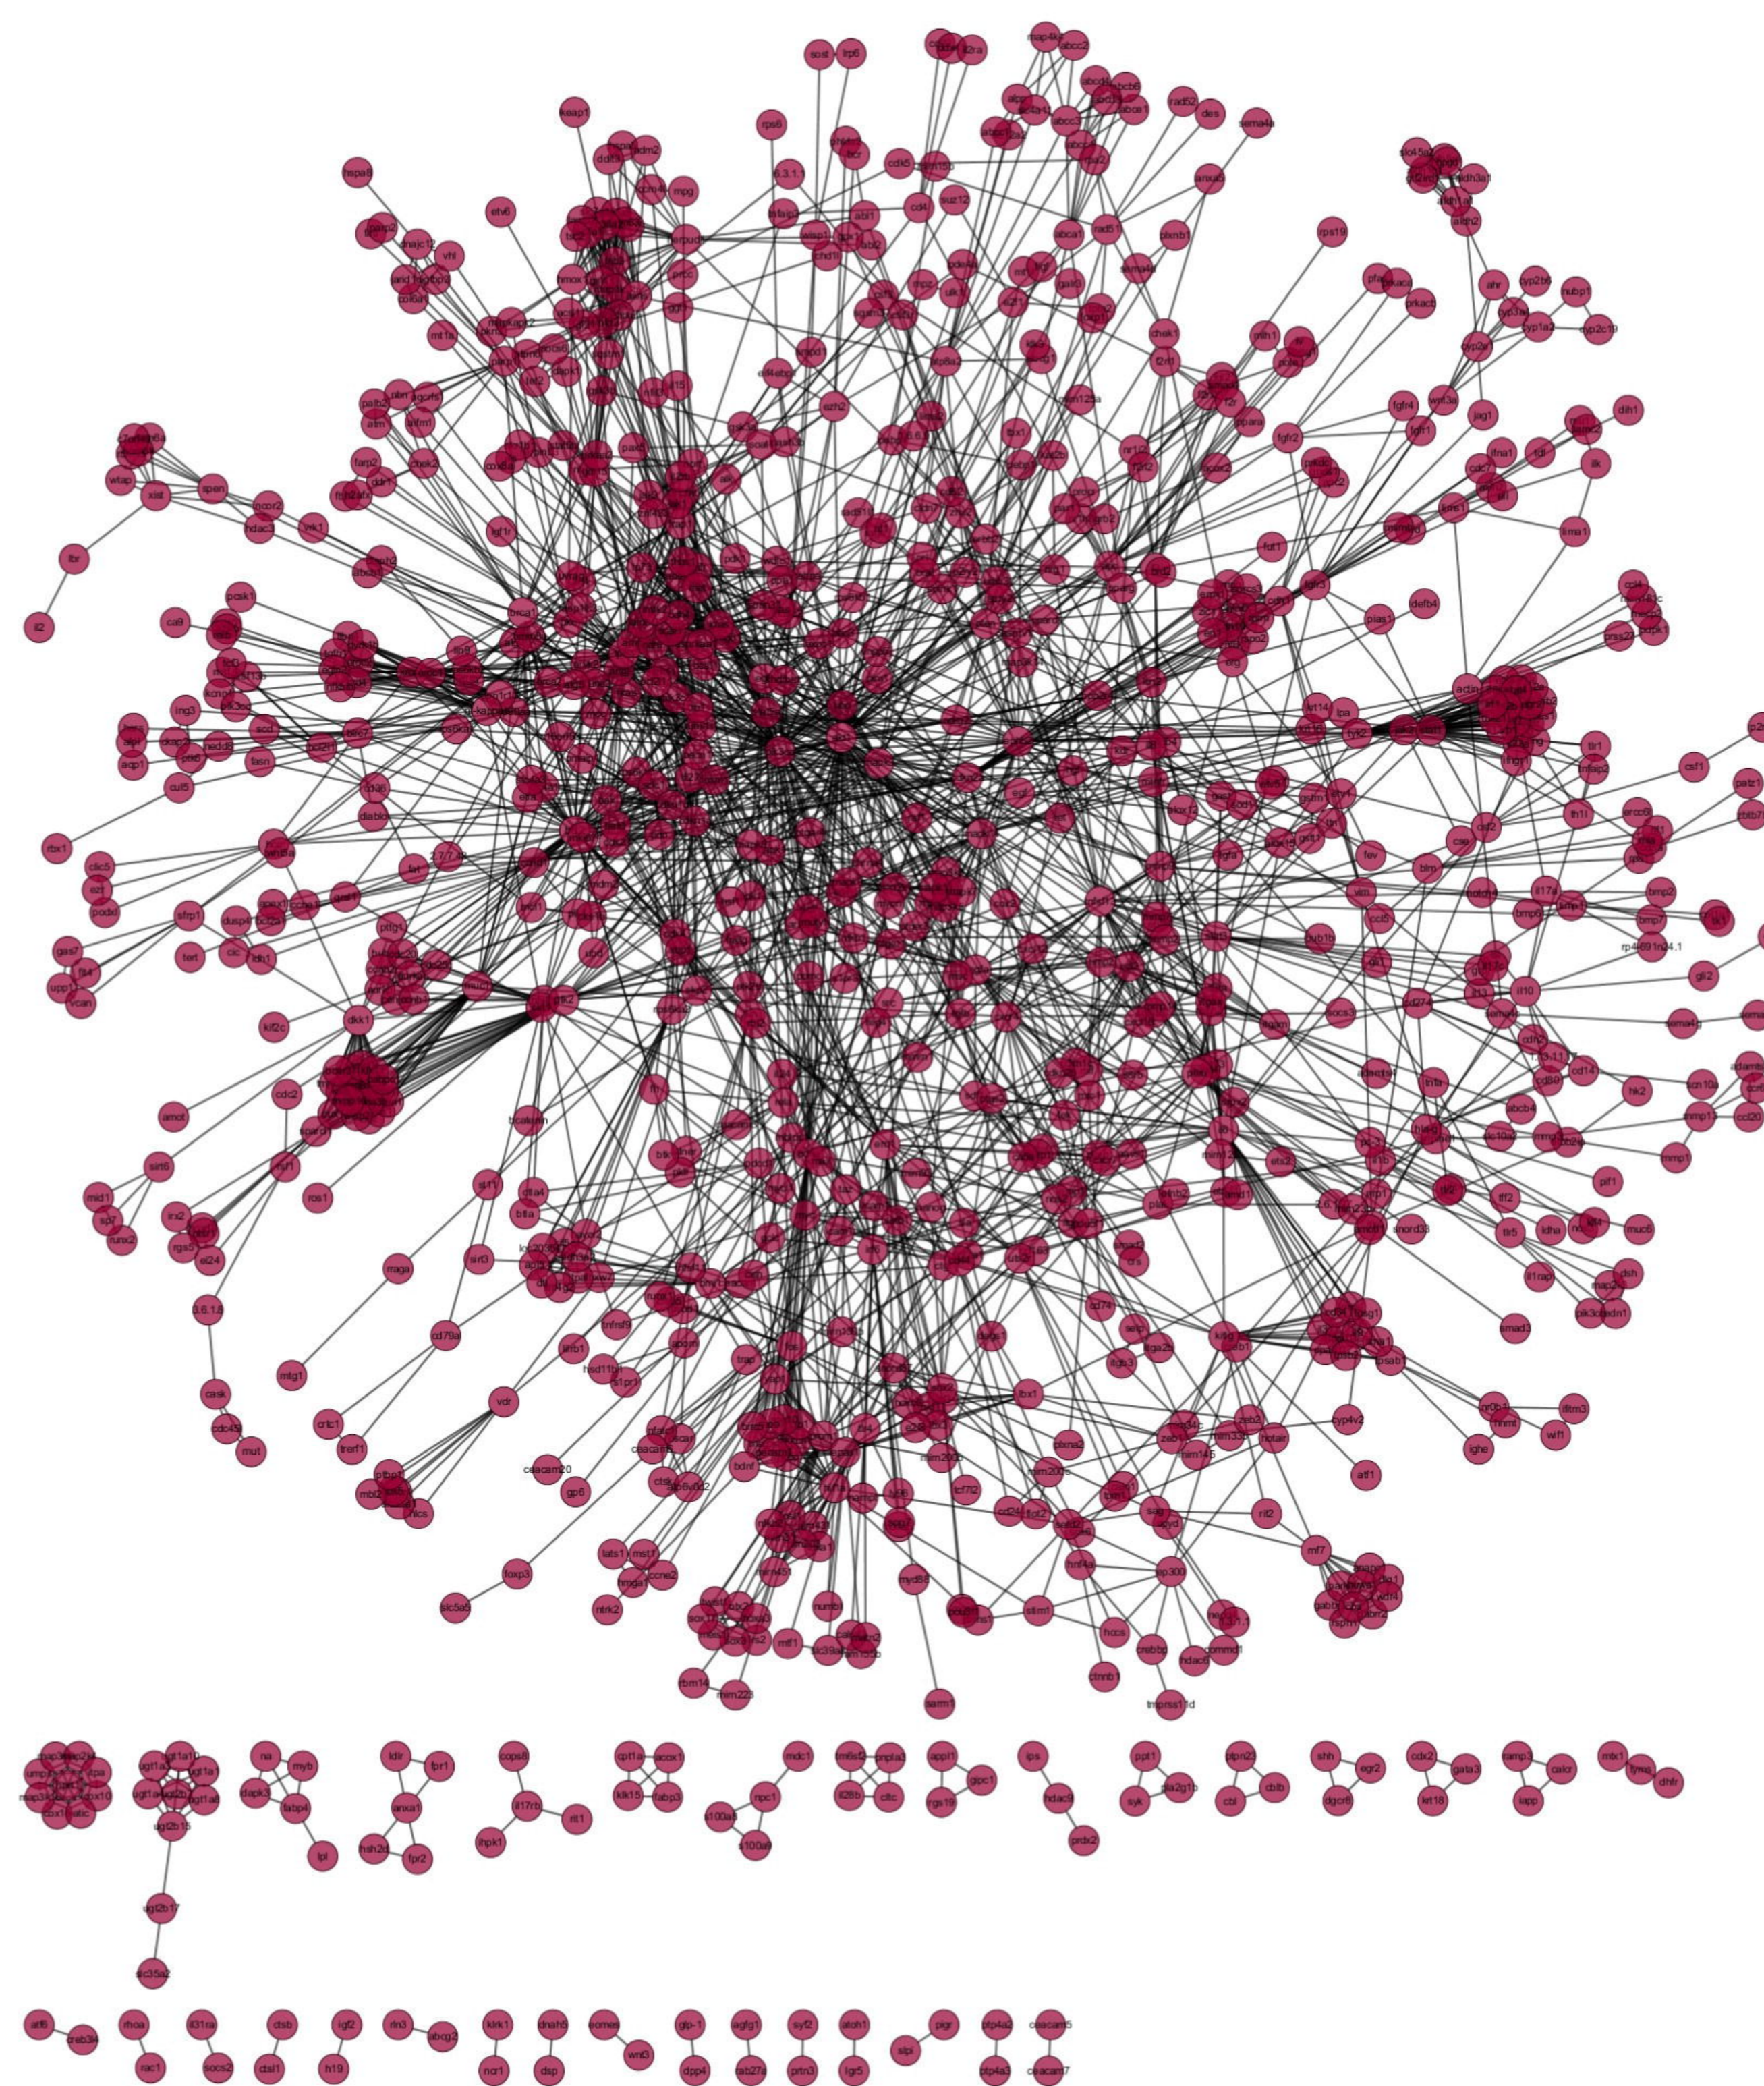

B



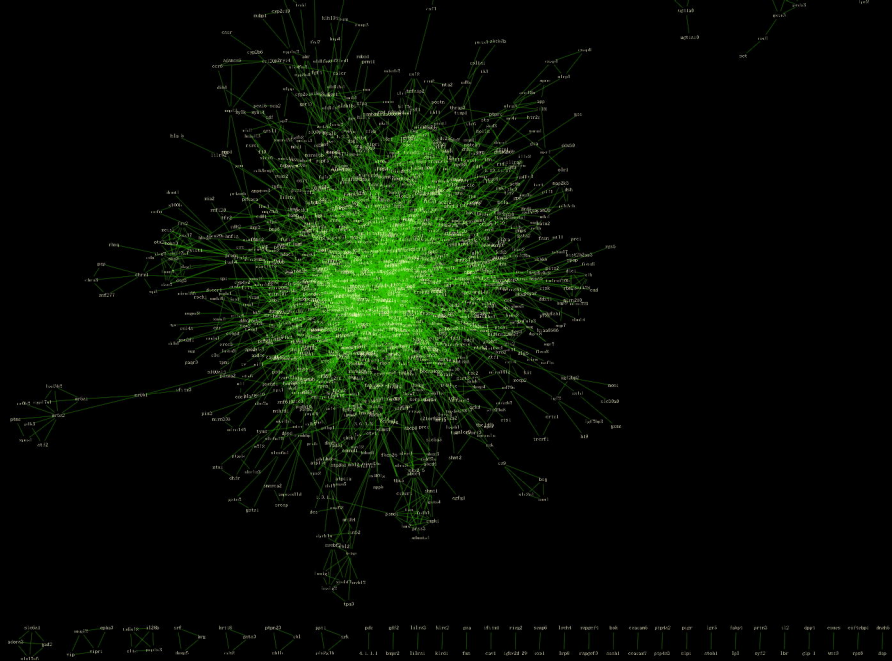

node1 node2 node3 node4 node5 node6 node7 node8 node9 node10 node11 node12 node13 node14 node15 node16 node17 node18 node19 node20 node21 node22 node23 node24 node25 node26 node27 node28 node29 node30 node31 node32 node33 node34 node35 node36 node37 node38 node39 node40 node41 node42 node43 node44 node45 node46 node47 node48 node49 node50 node51 node52 node53 node54 node55 node56 node57 node58 node59 node60 node61 node62 node63 node64 node65 node66 node67 node68 node69 node70 node71 node72 node73 node74 node75 node76 node77 node78 node79 node80 node81 node82 node83 node84 node85 node86 node87 node88 node89 node90 node91 node92 node93 node94 node95 node96 node97 node98 node99 node100



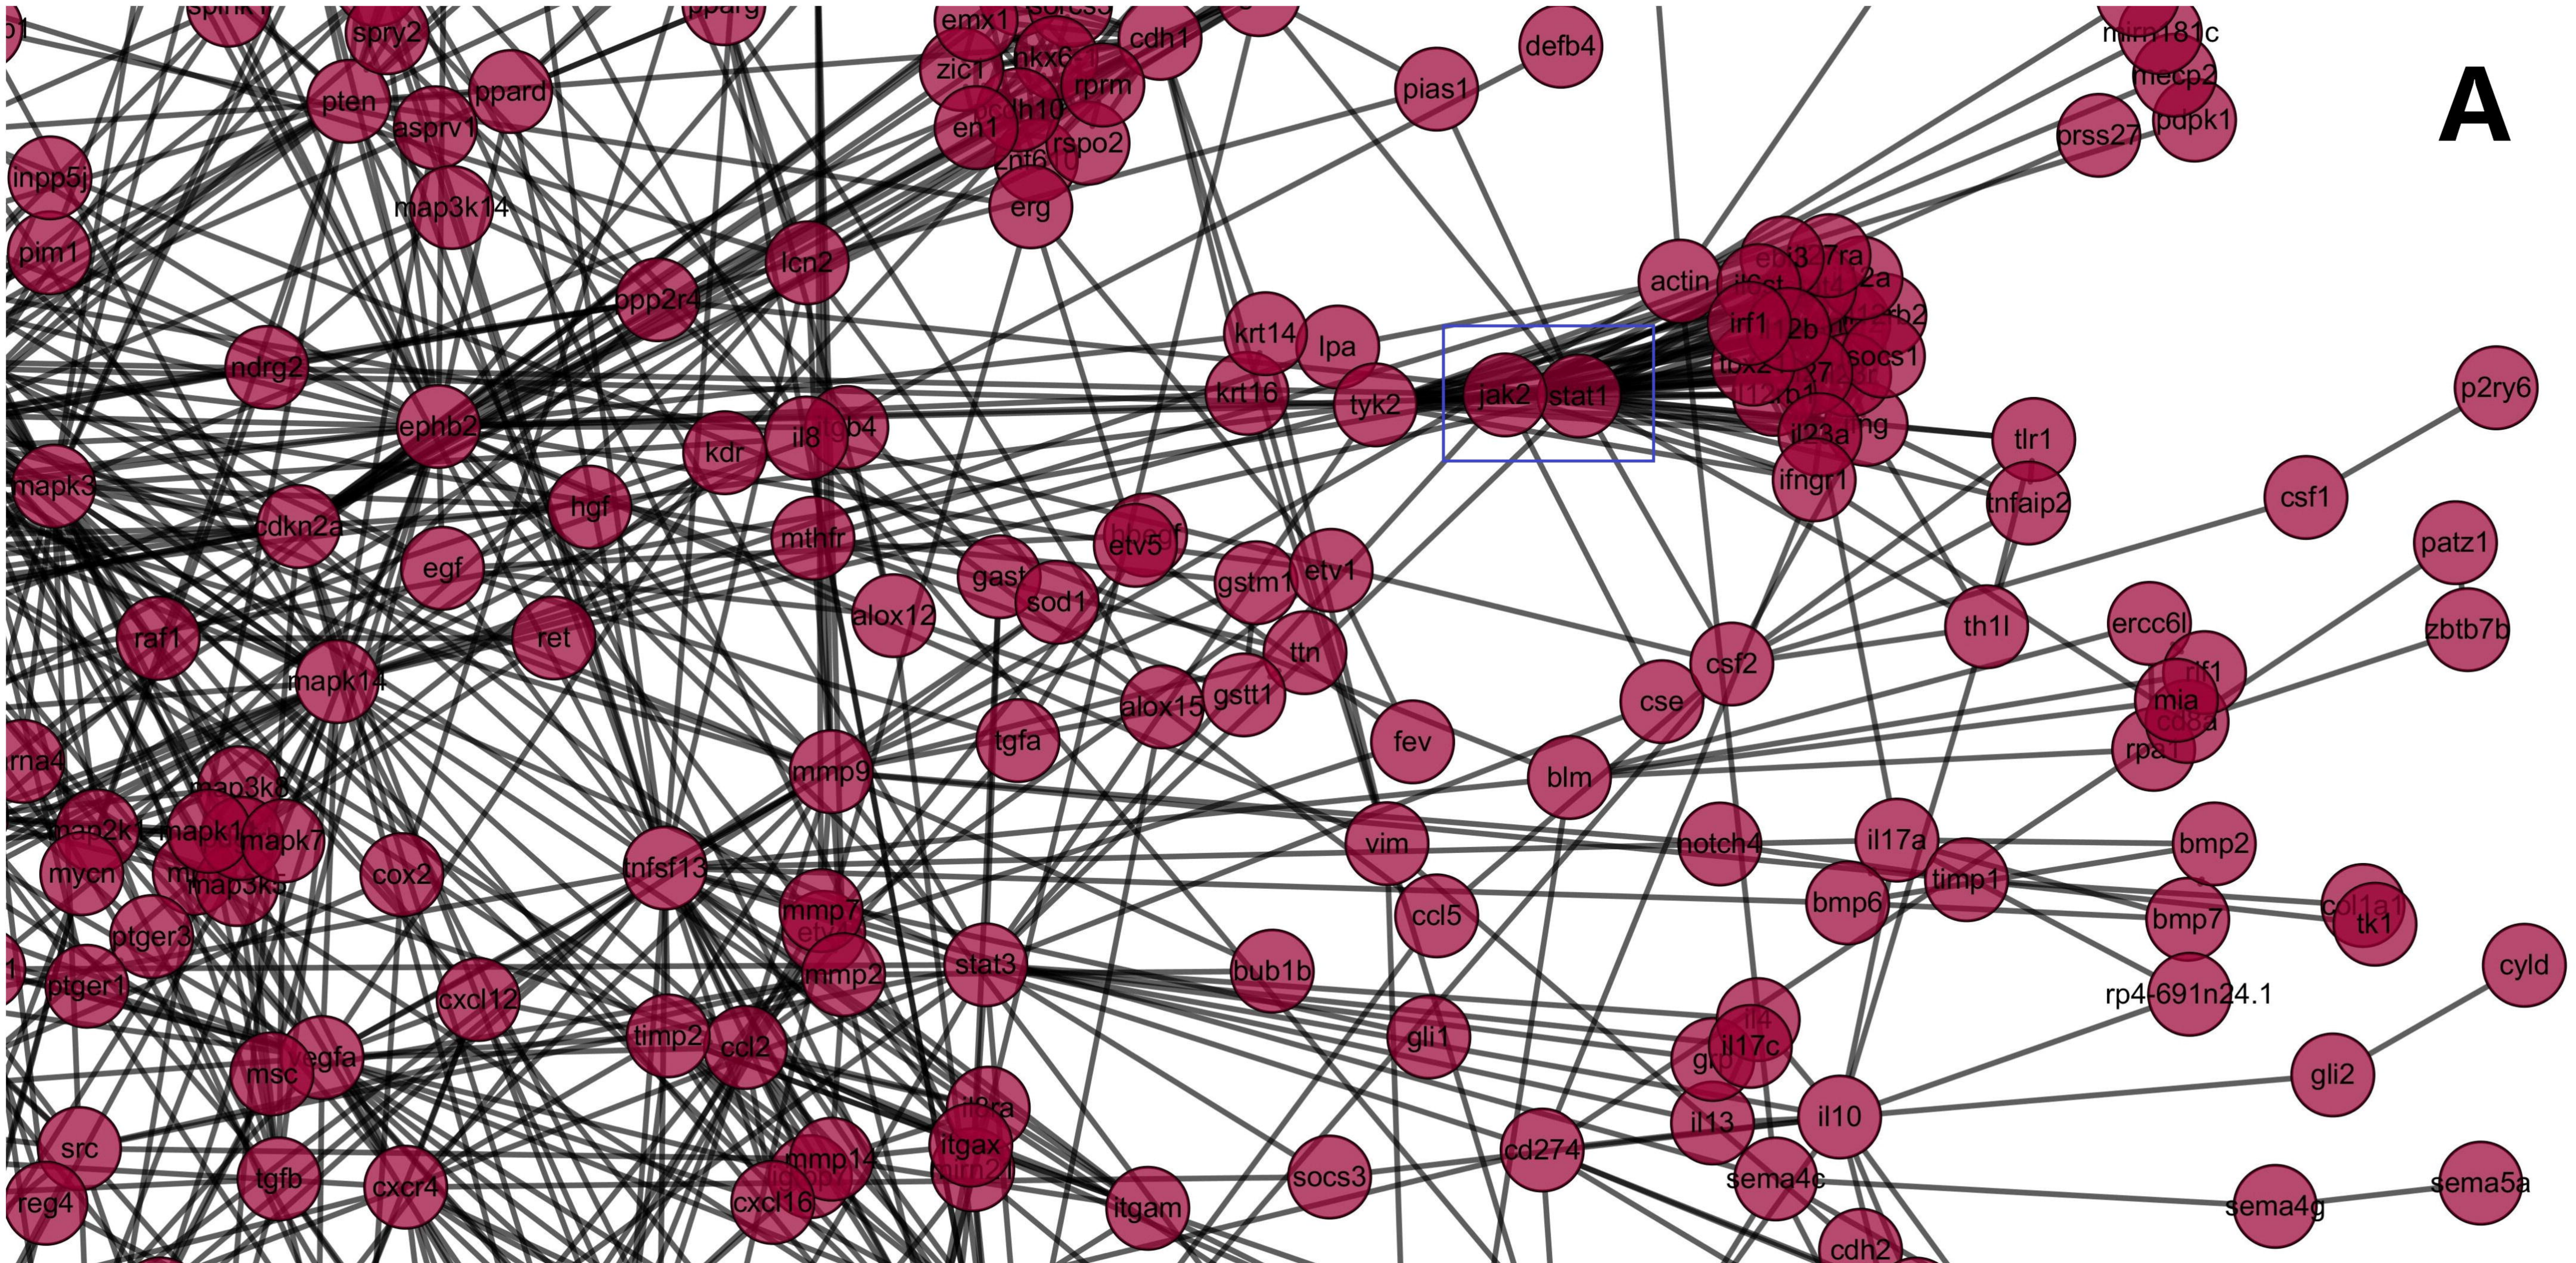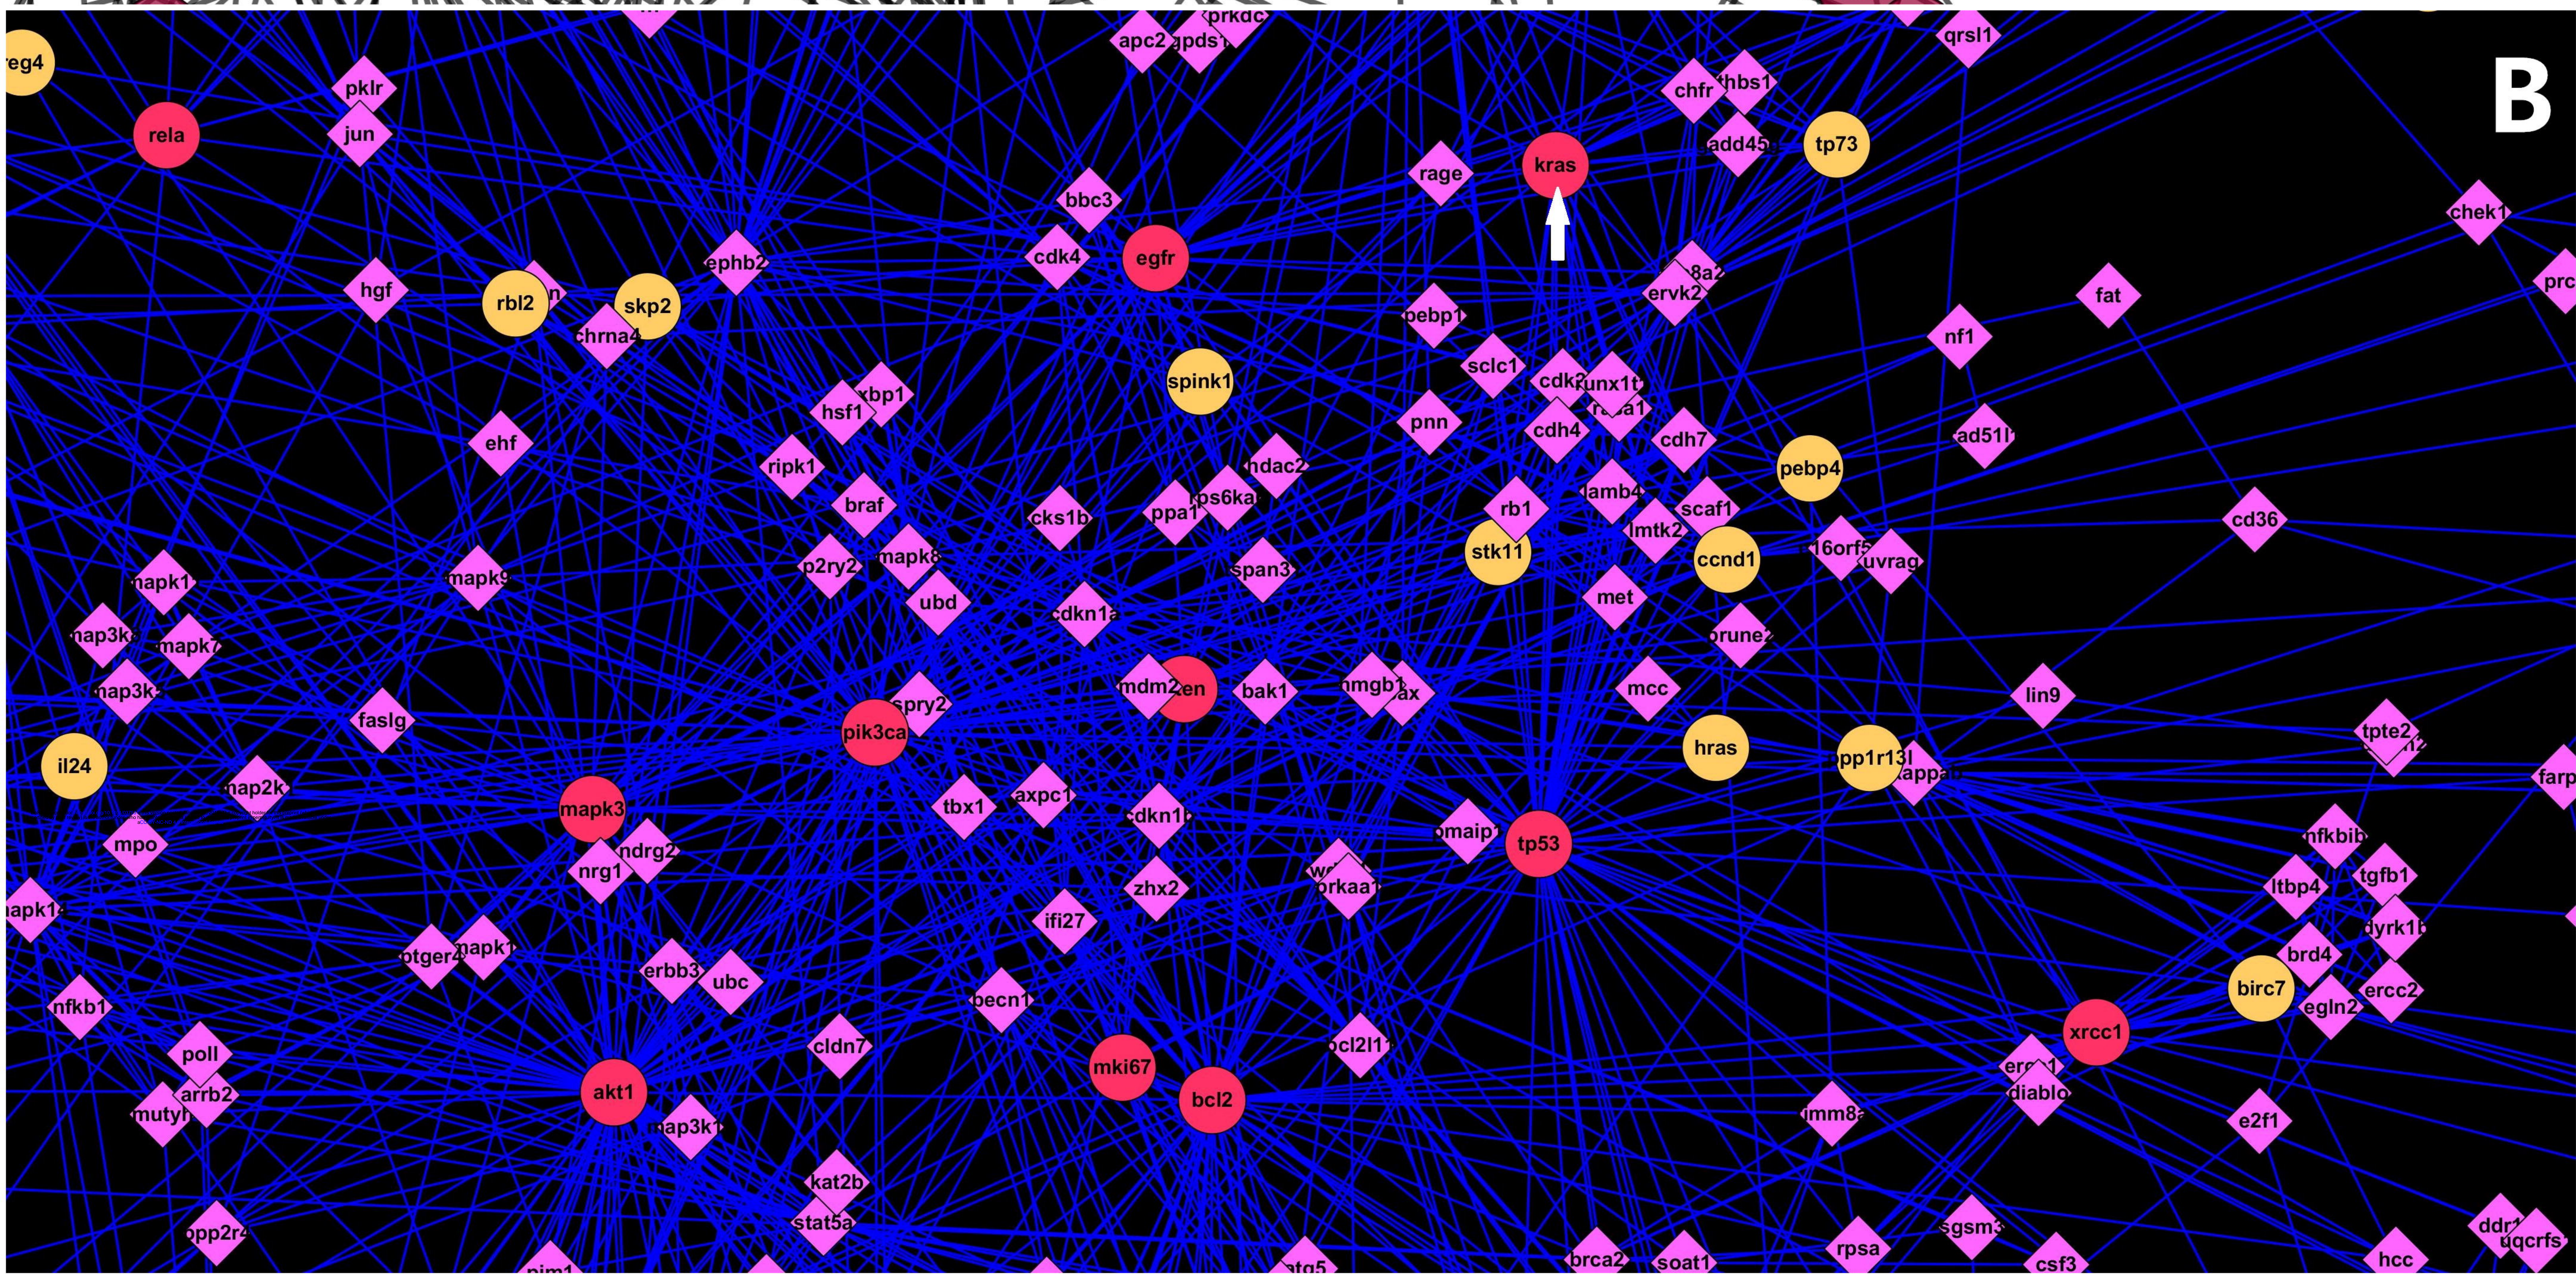



### Centiscape Scatter Plot view

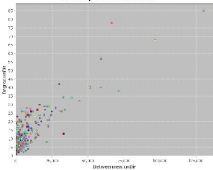



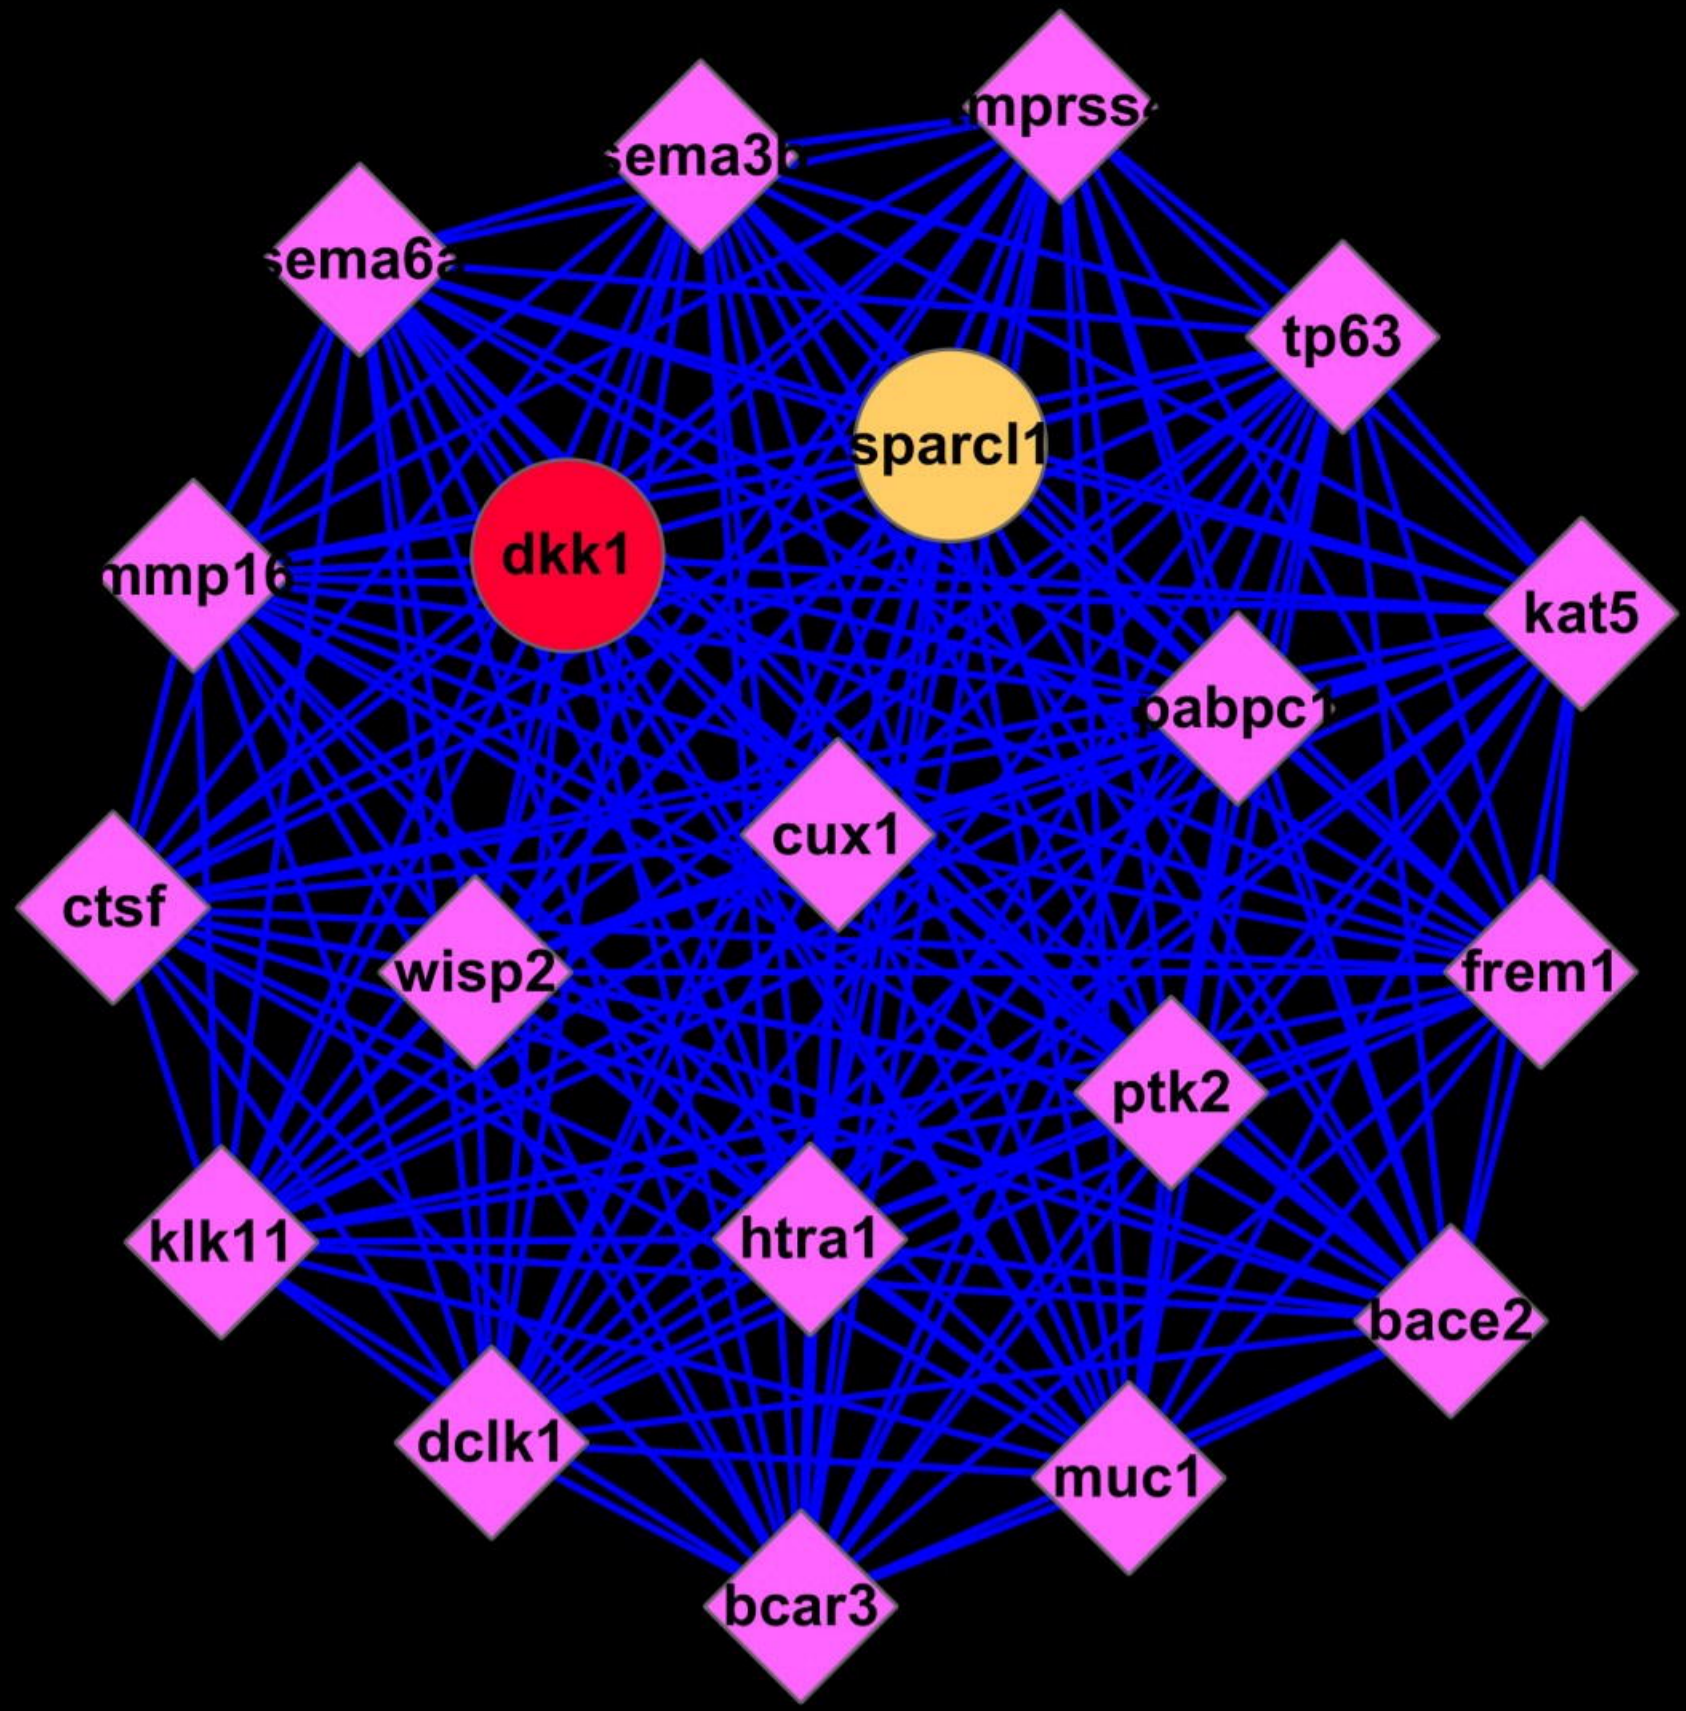

cluster1

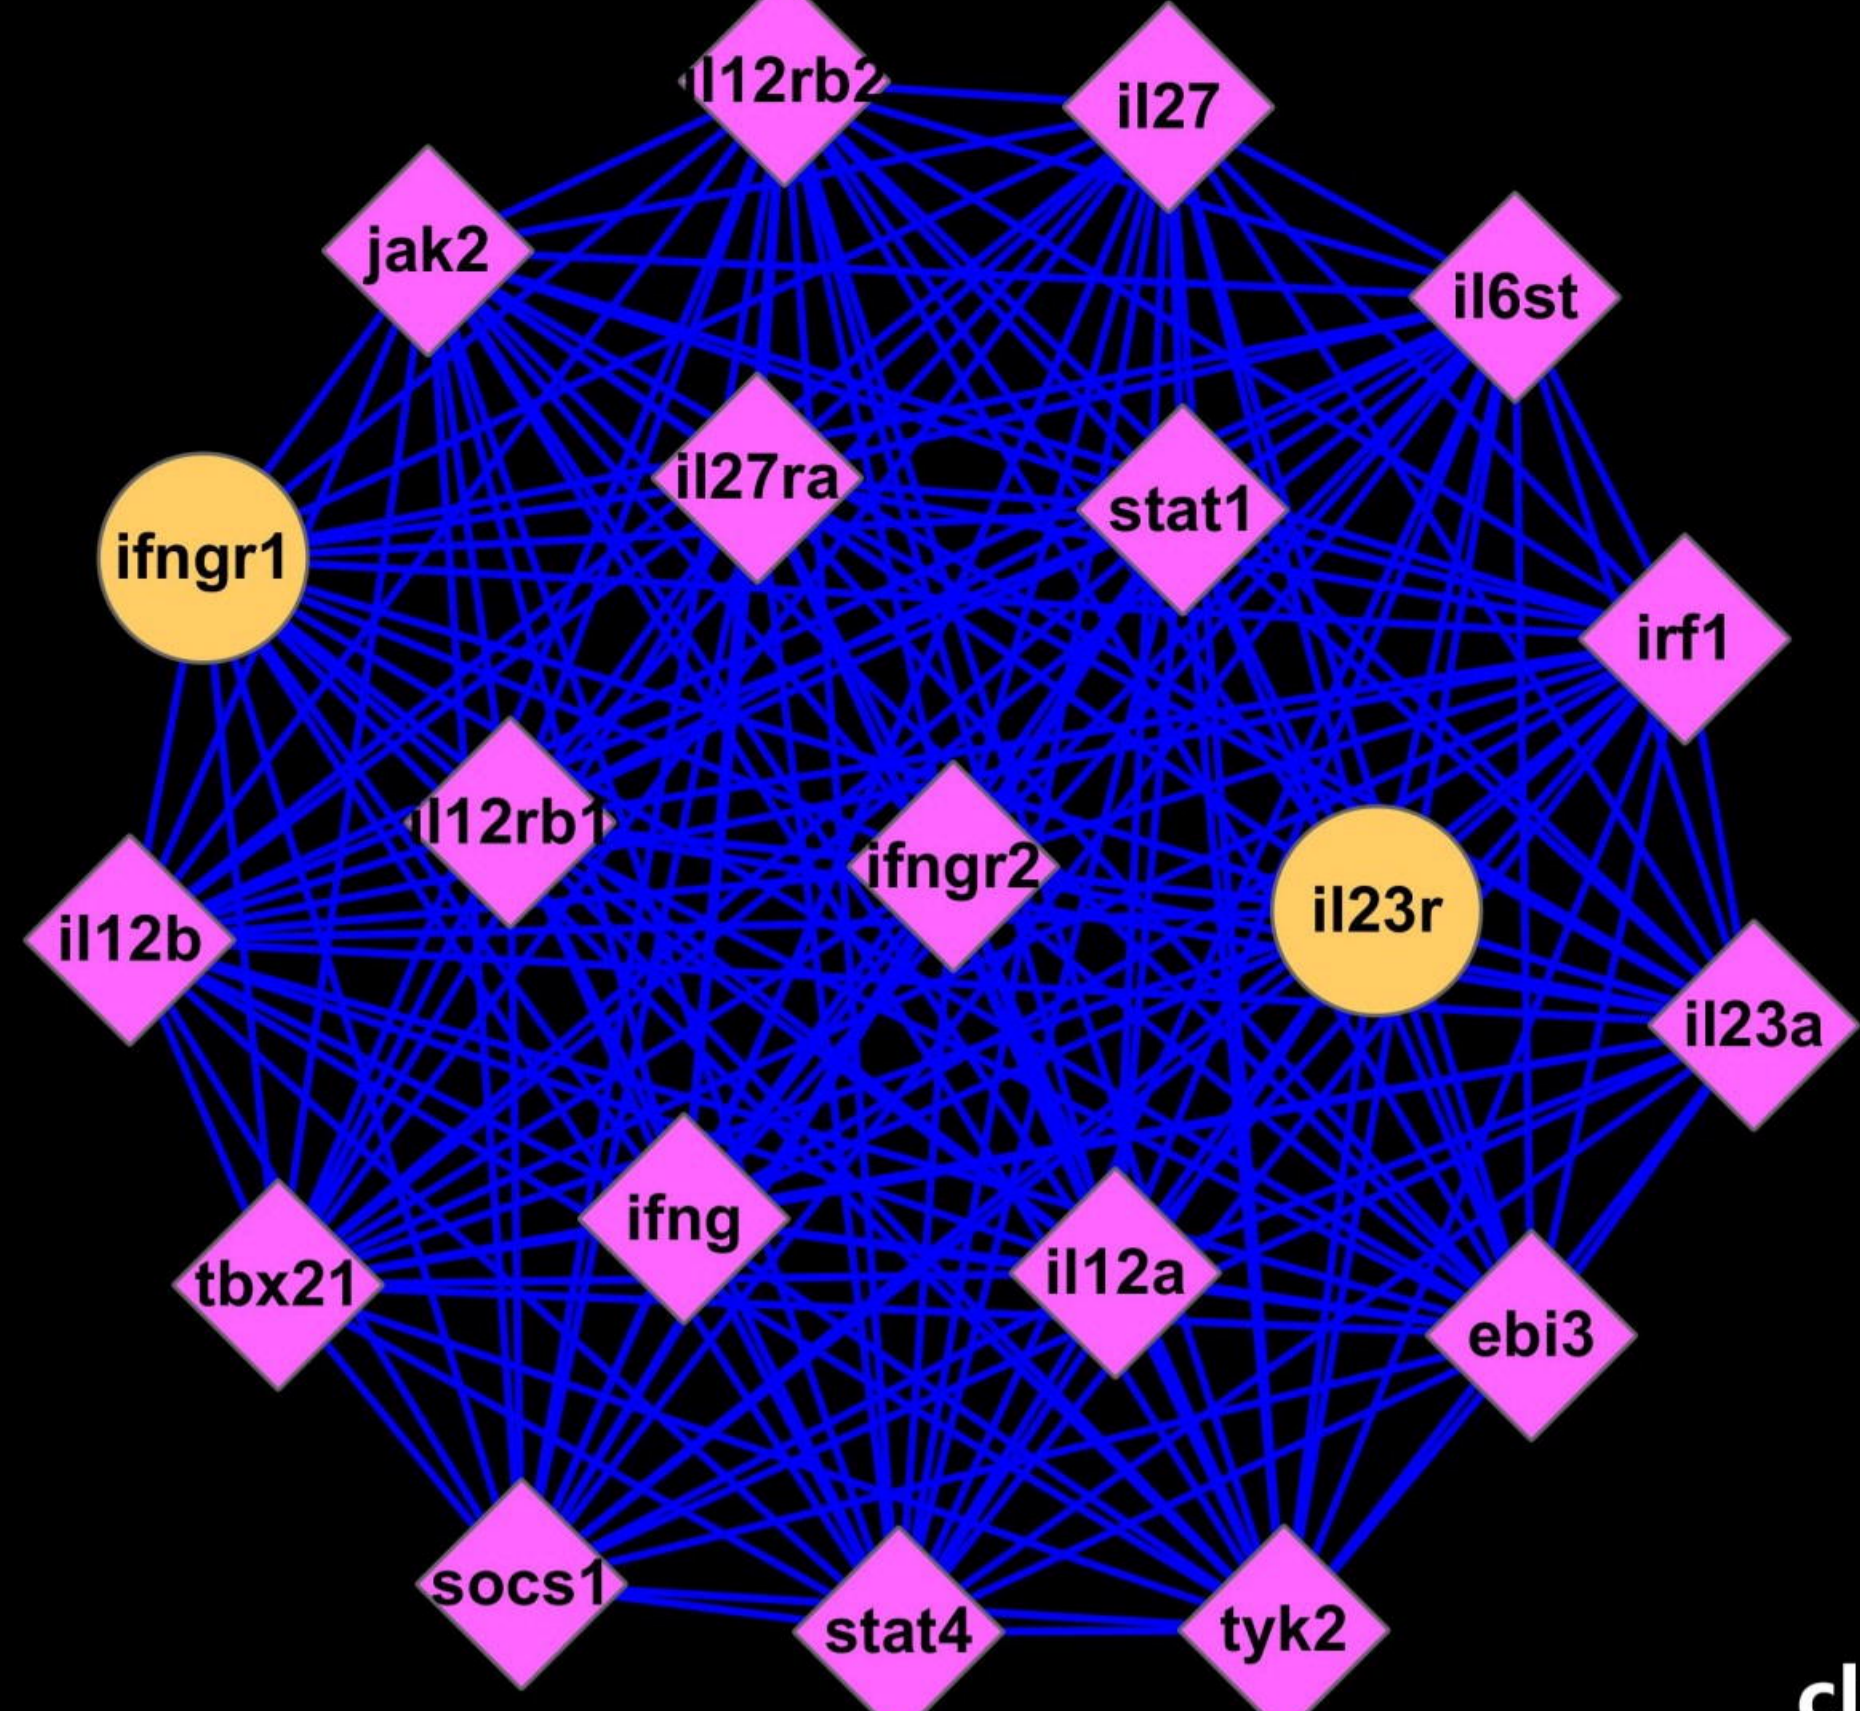

cluster2

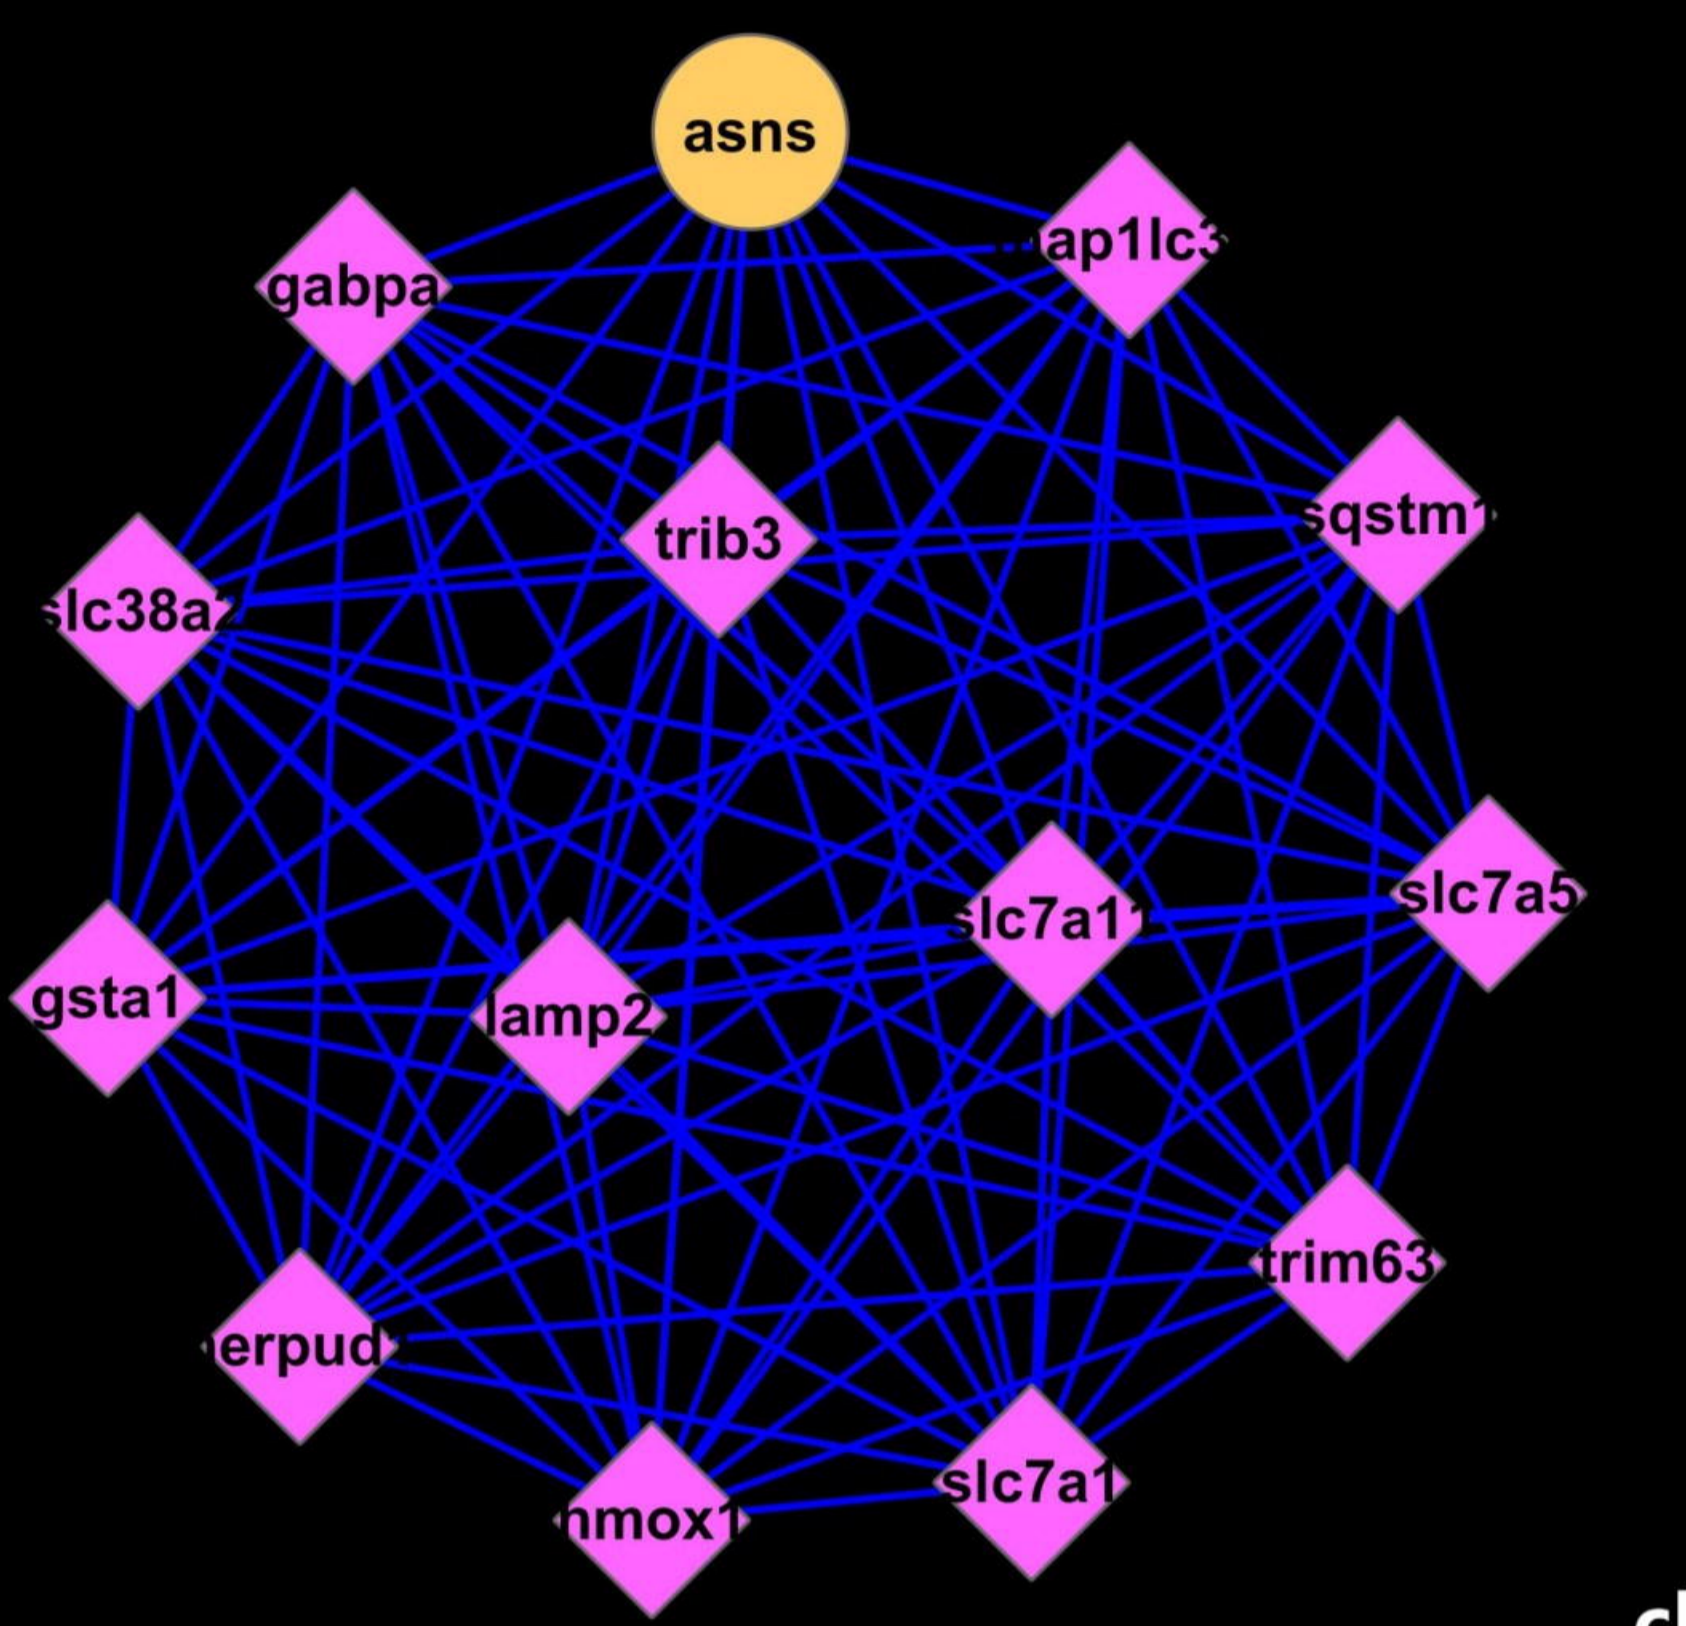

cluster3

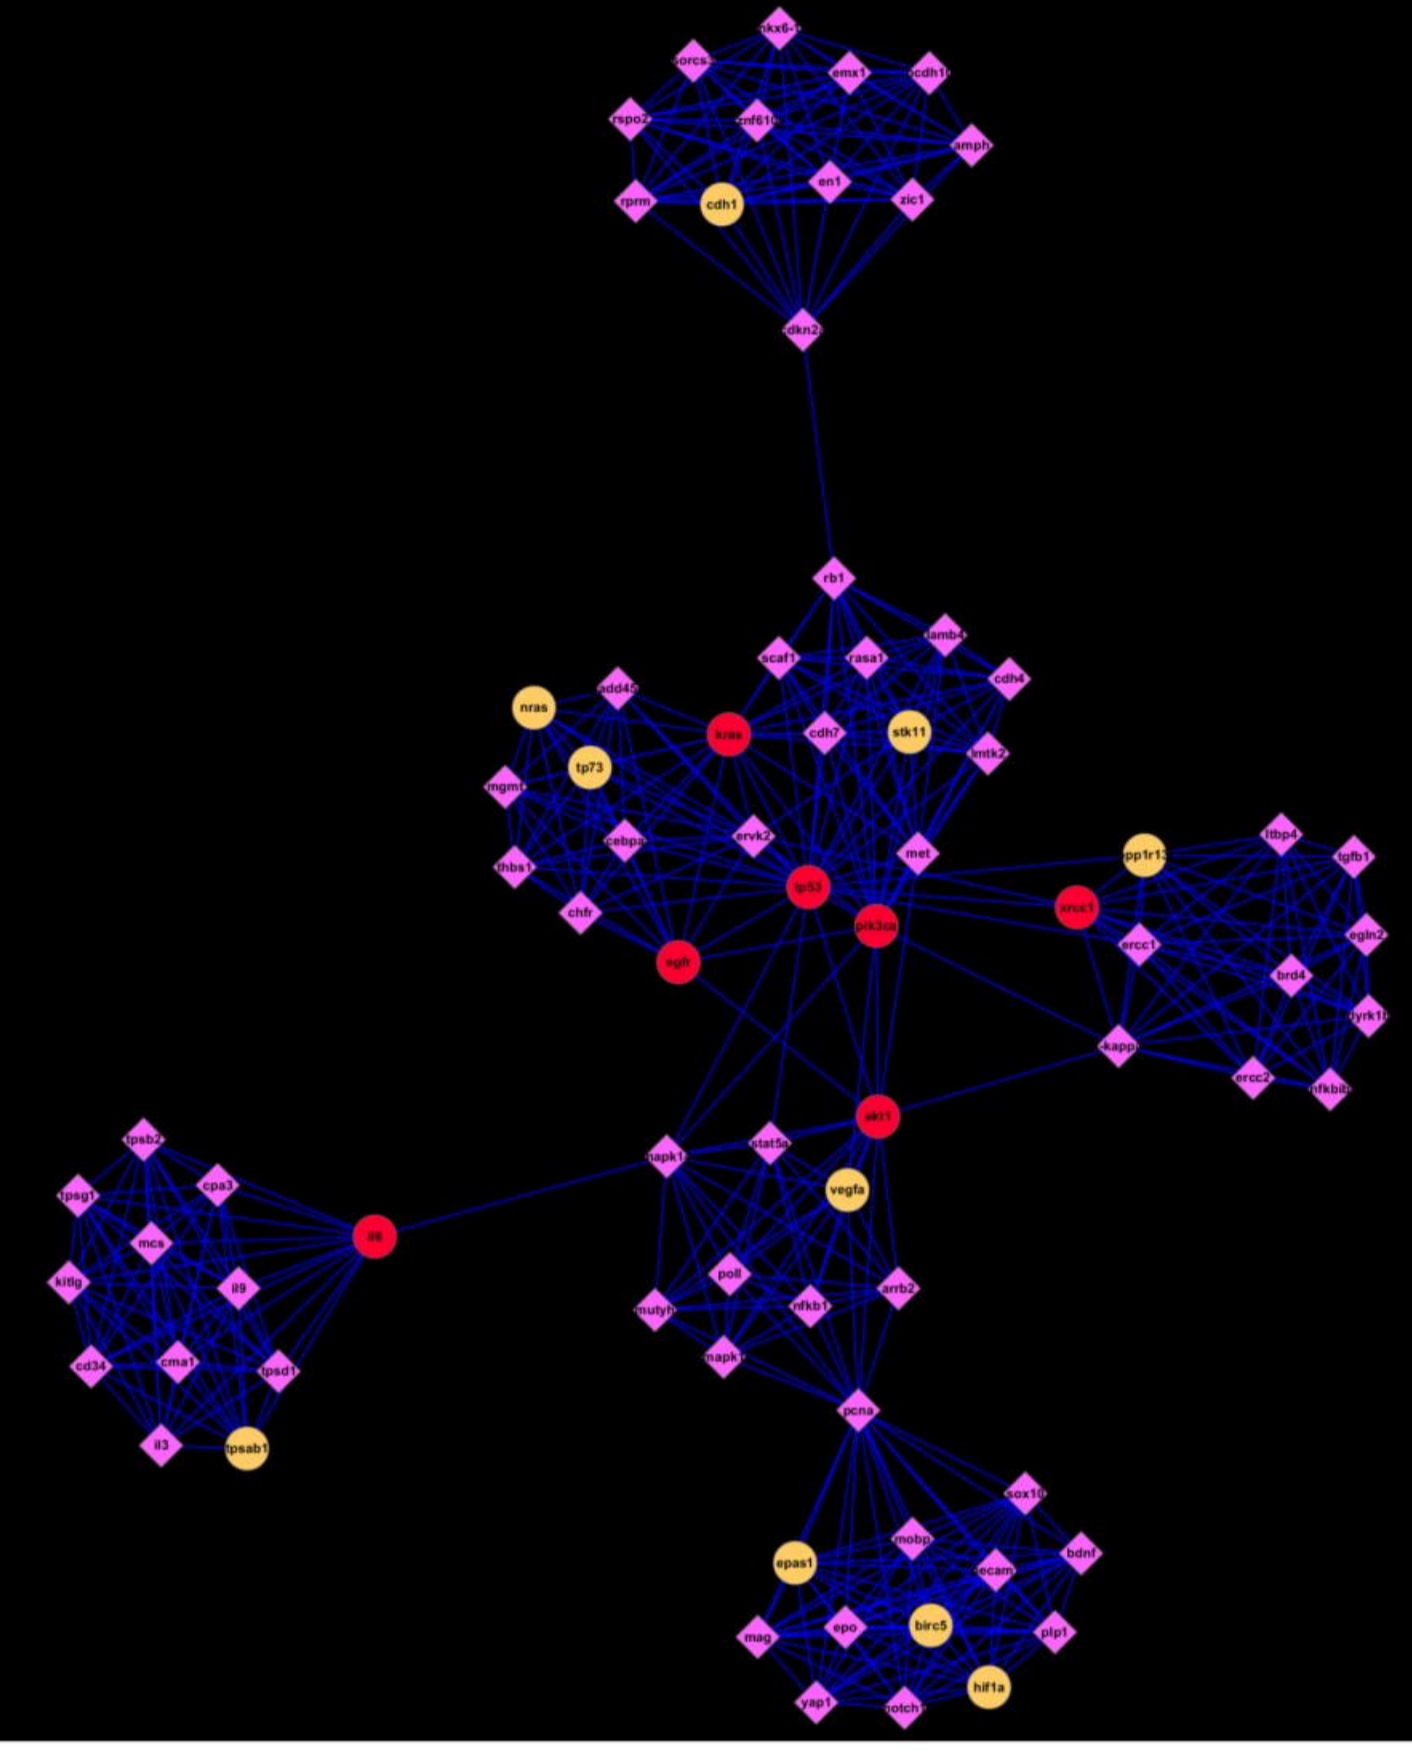

cluster4

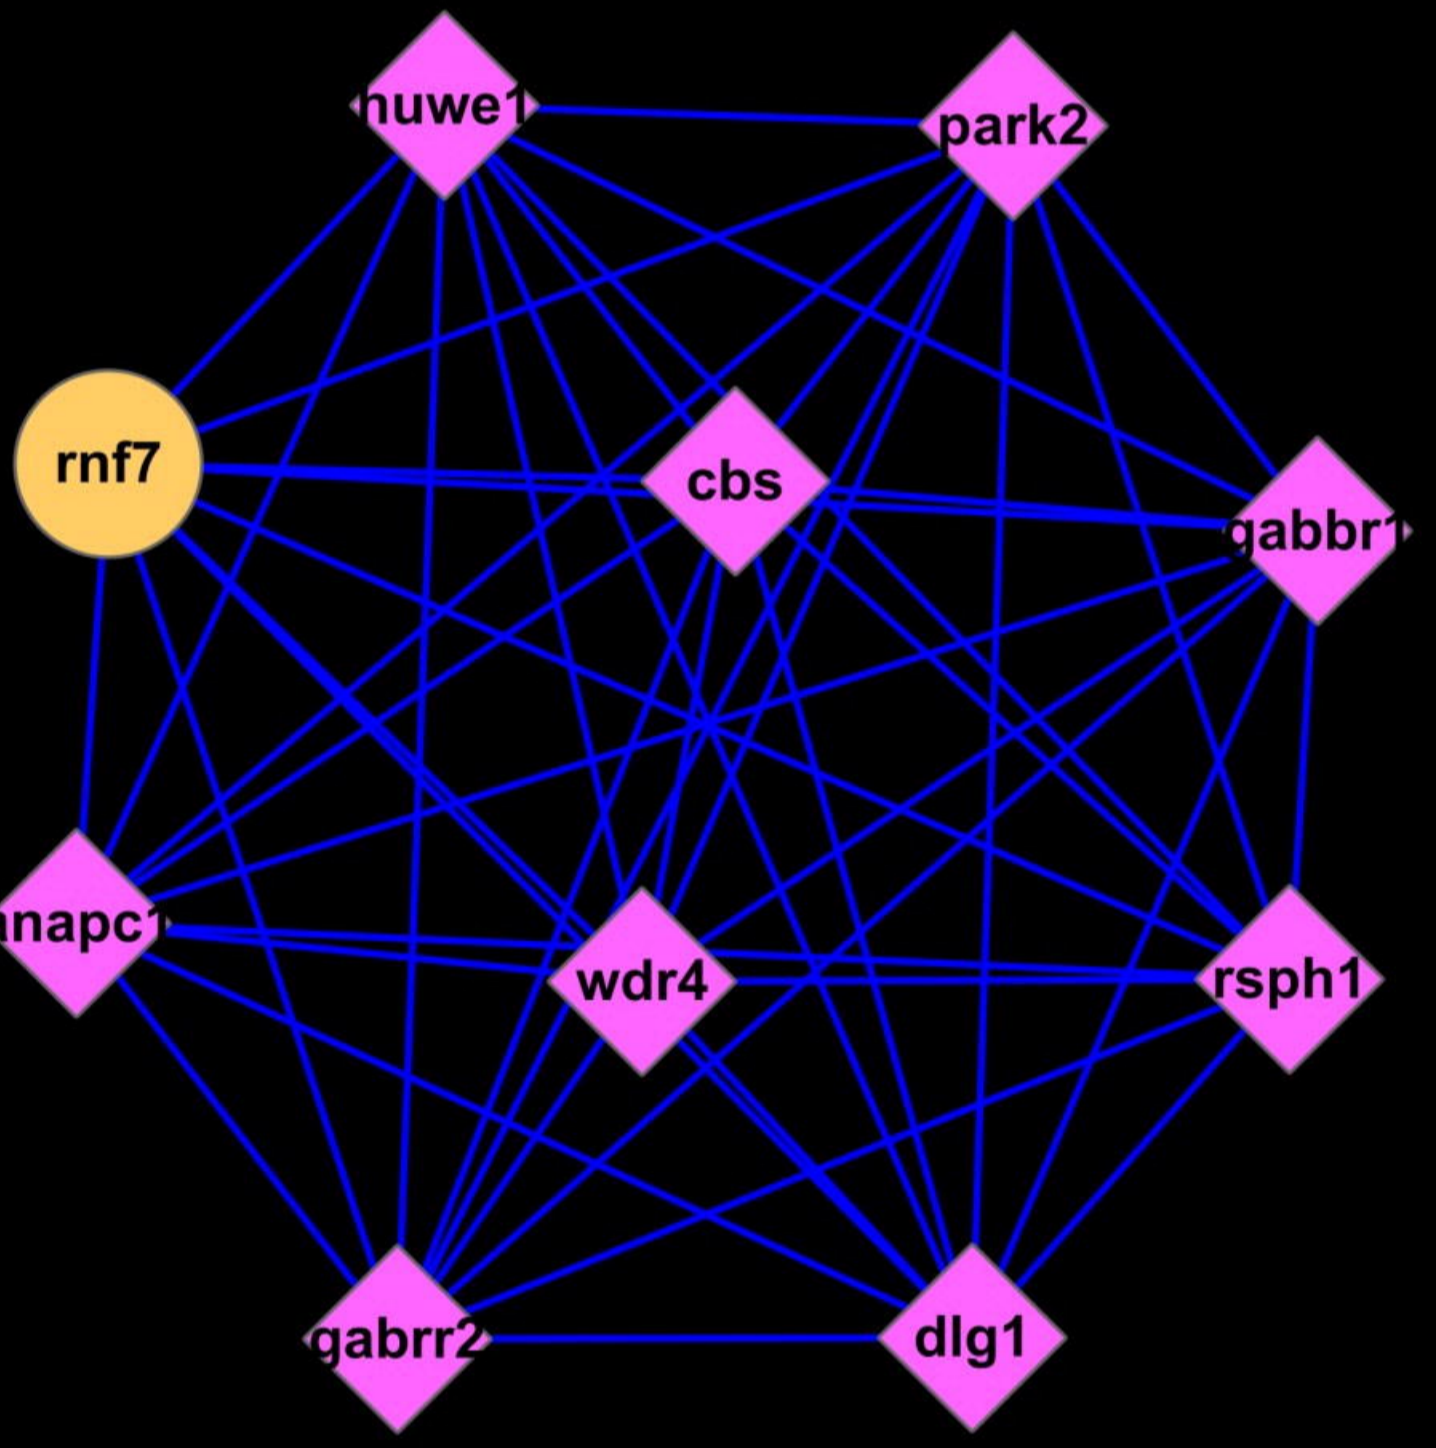

cluster5

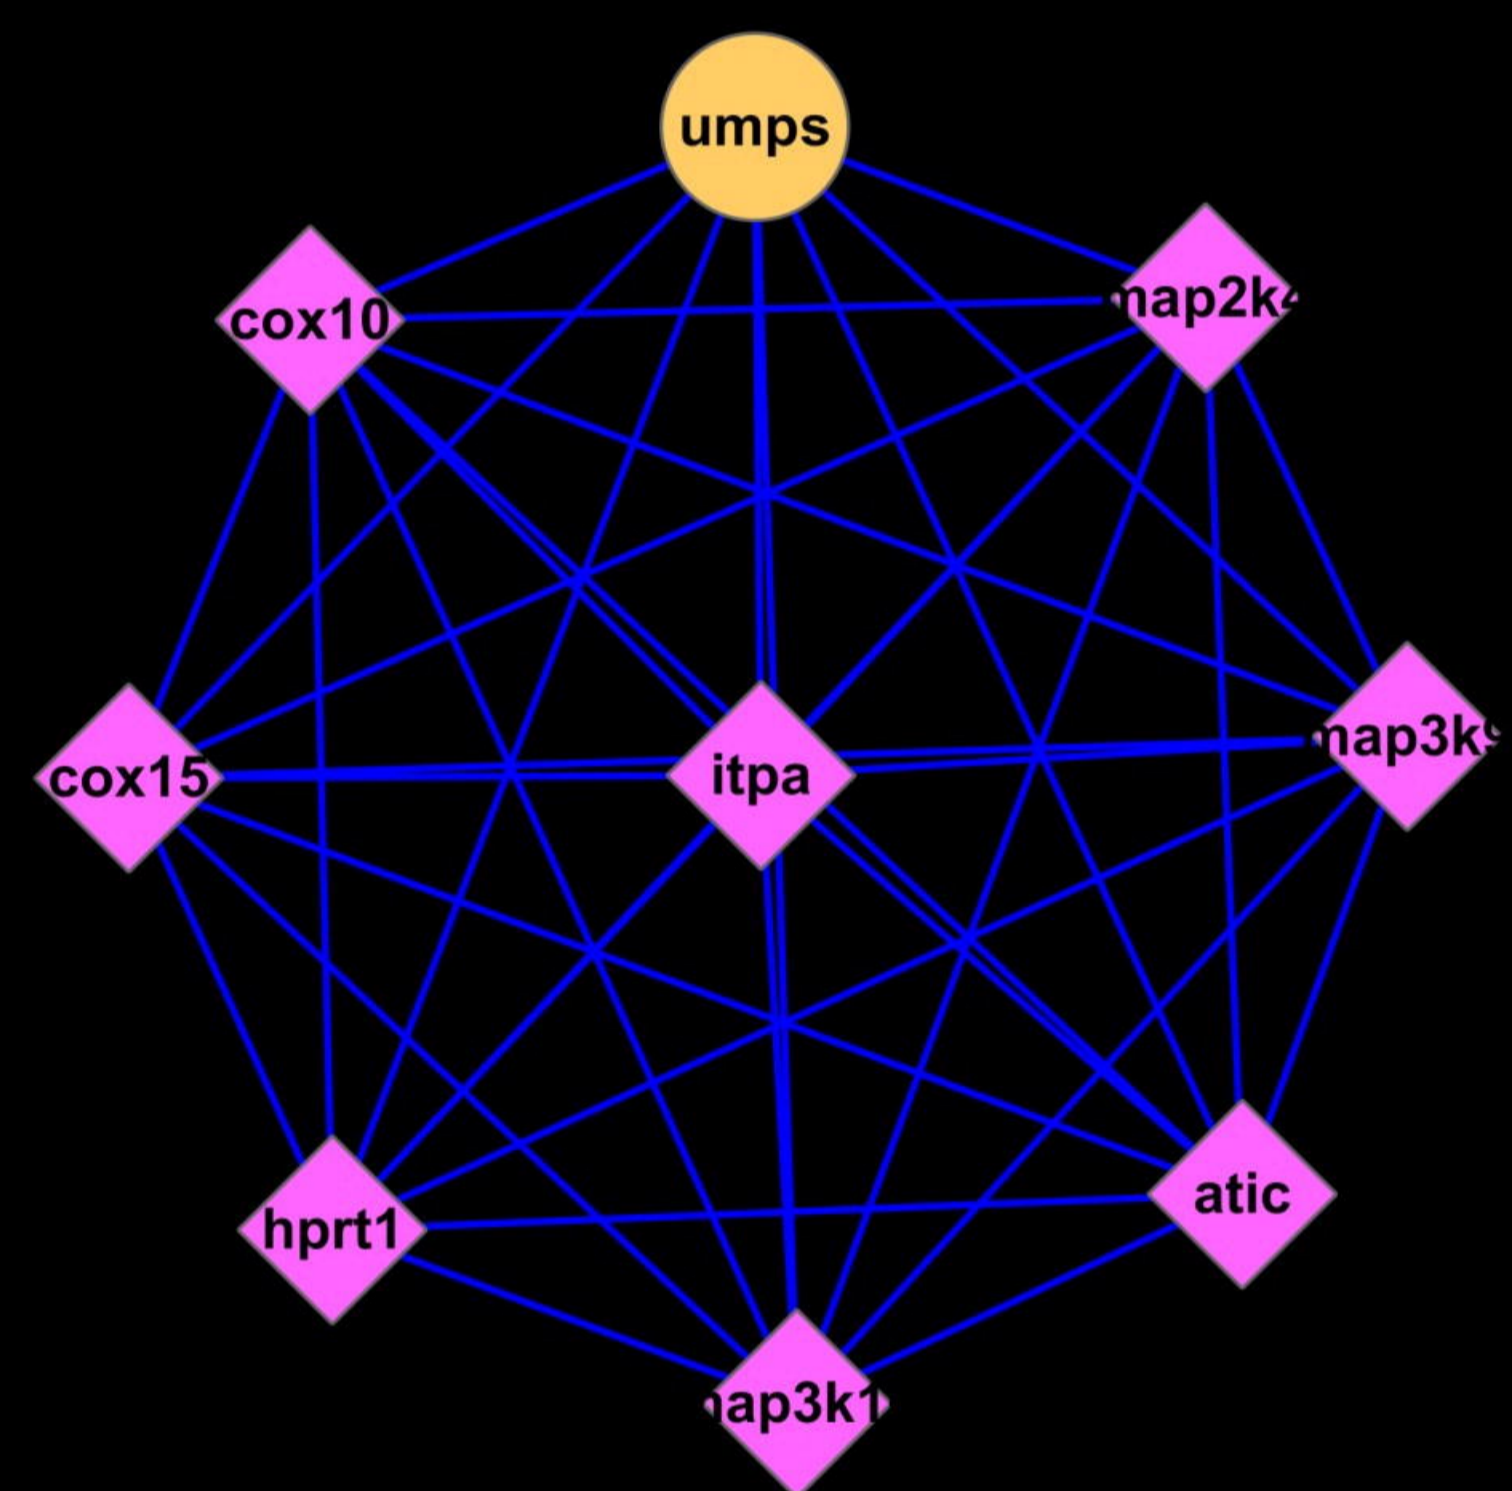

cluster6

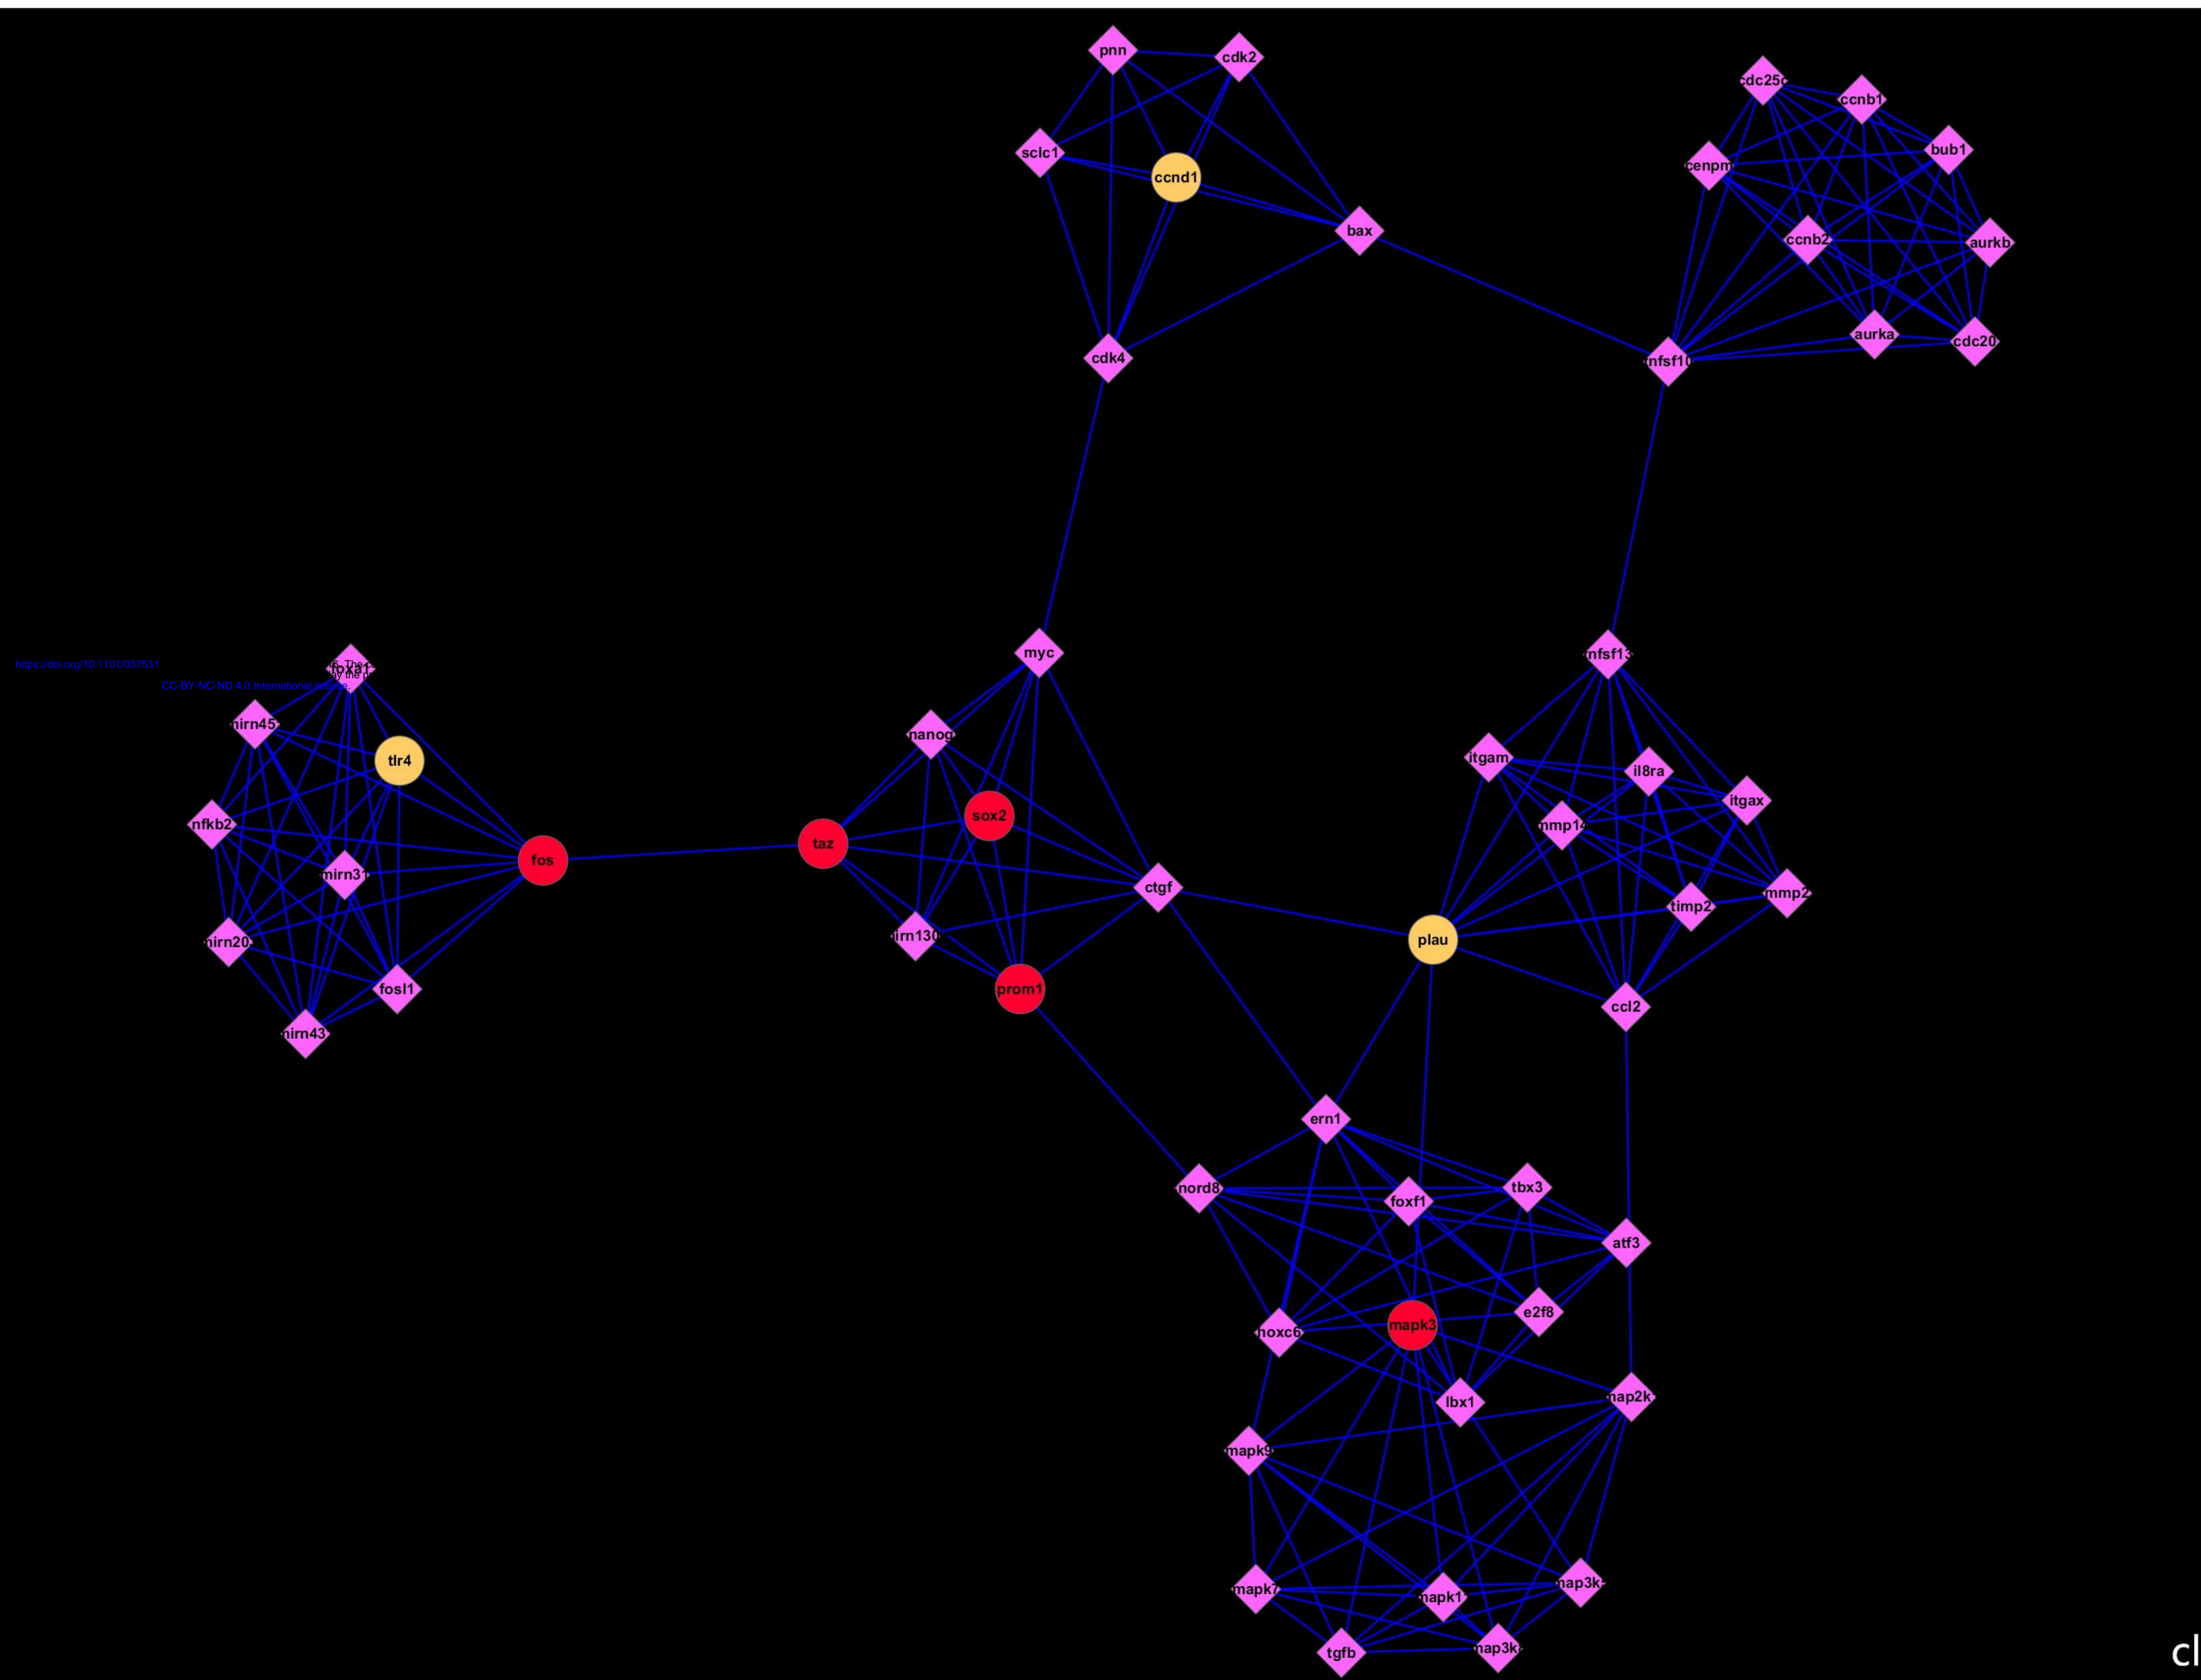

cluster7



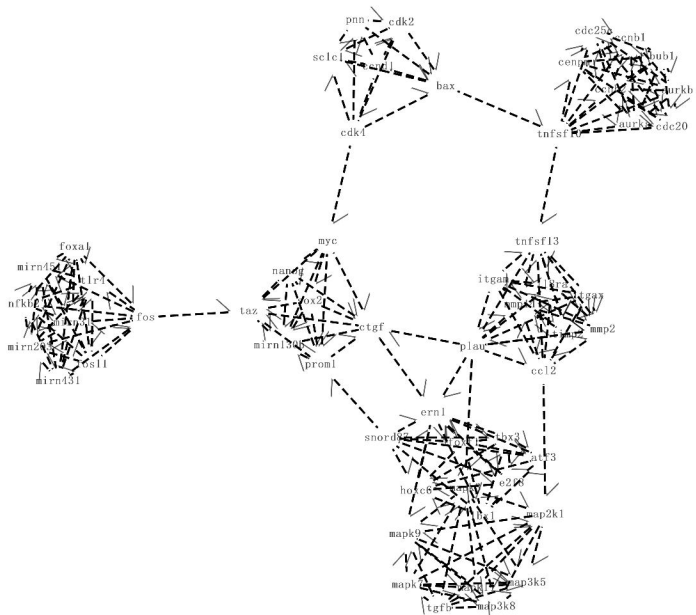



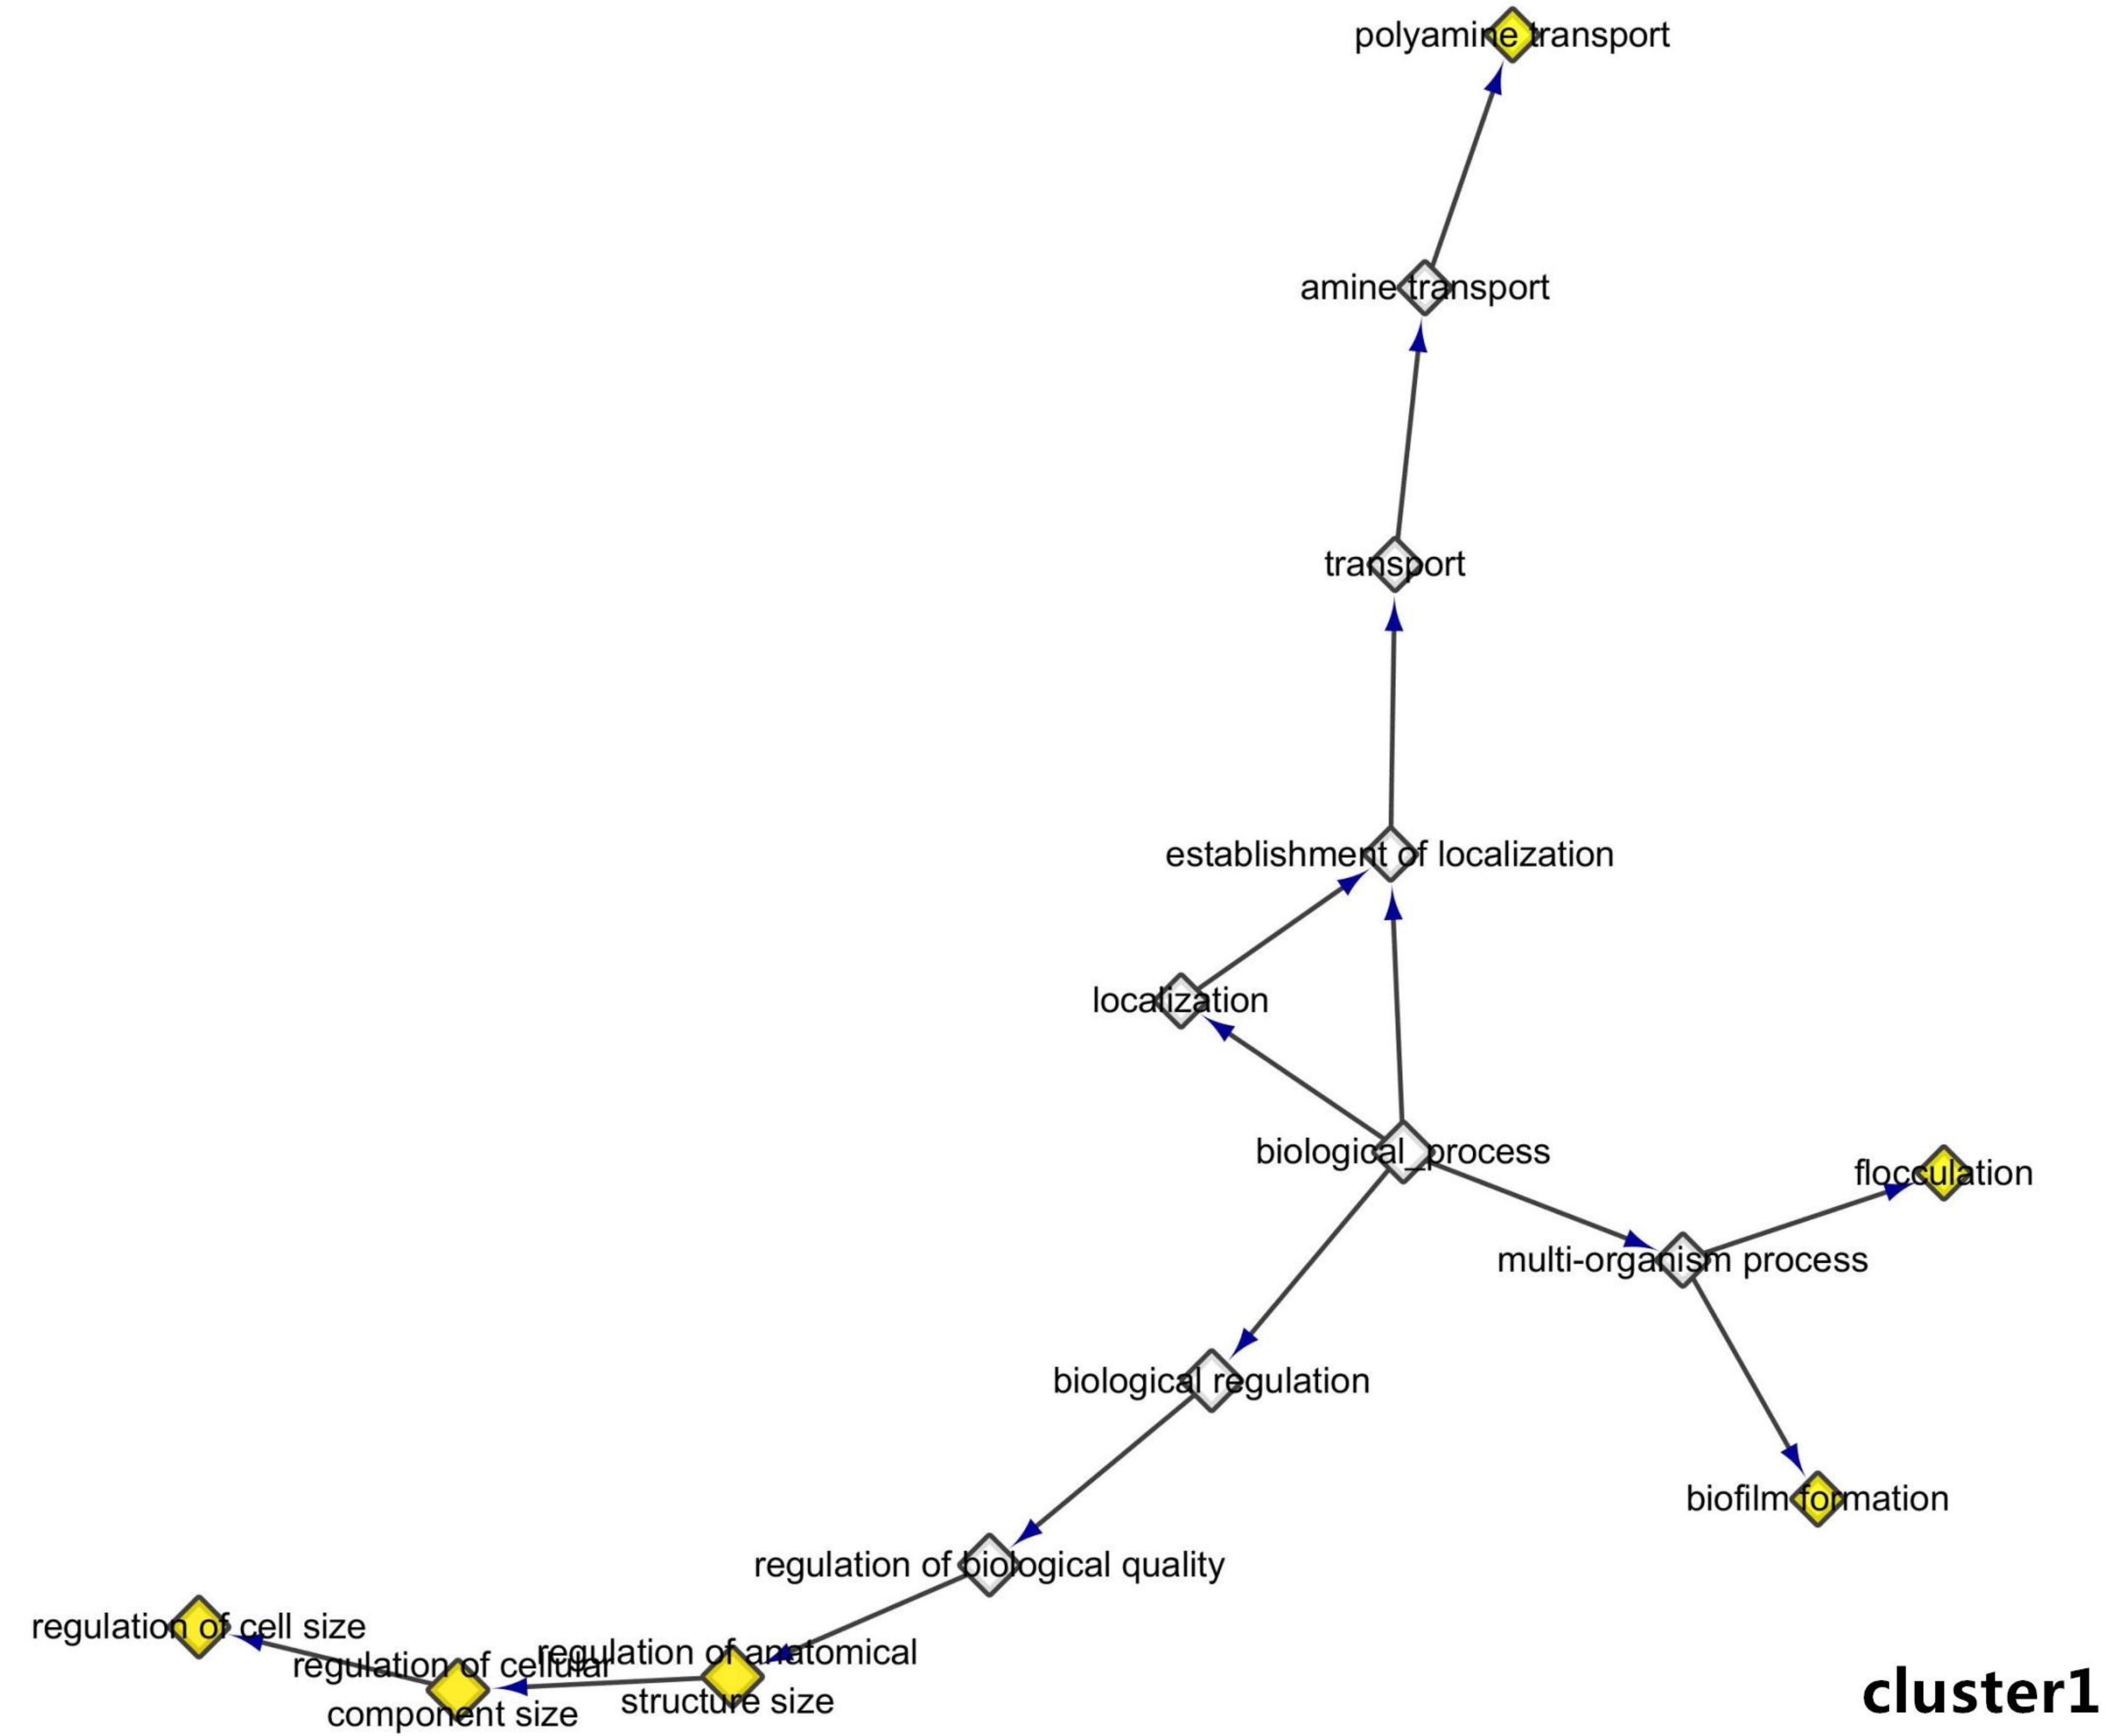

cluster1

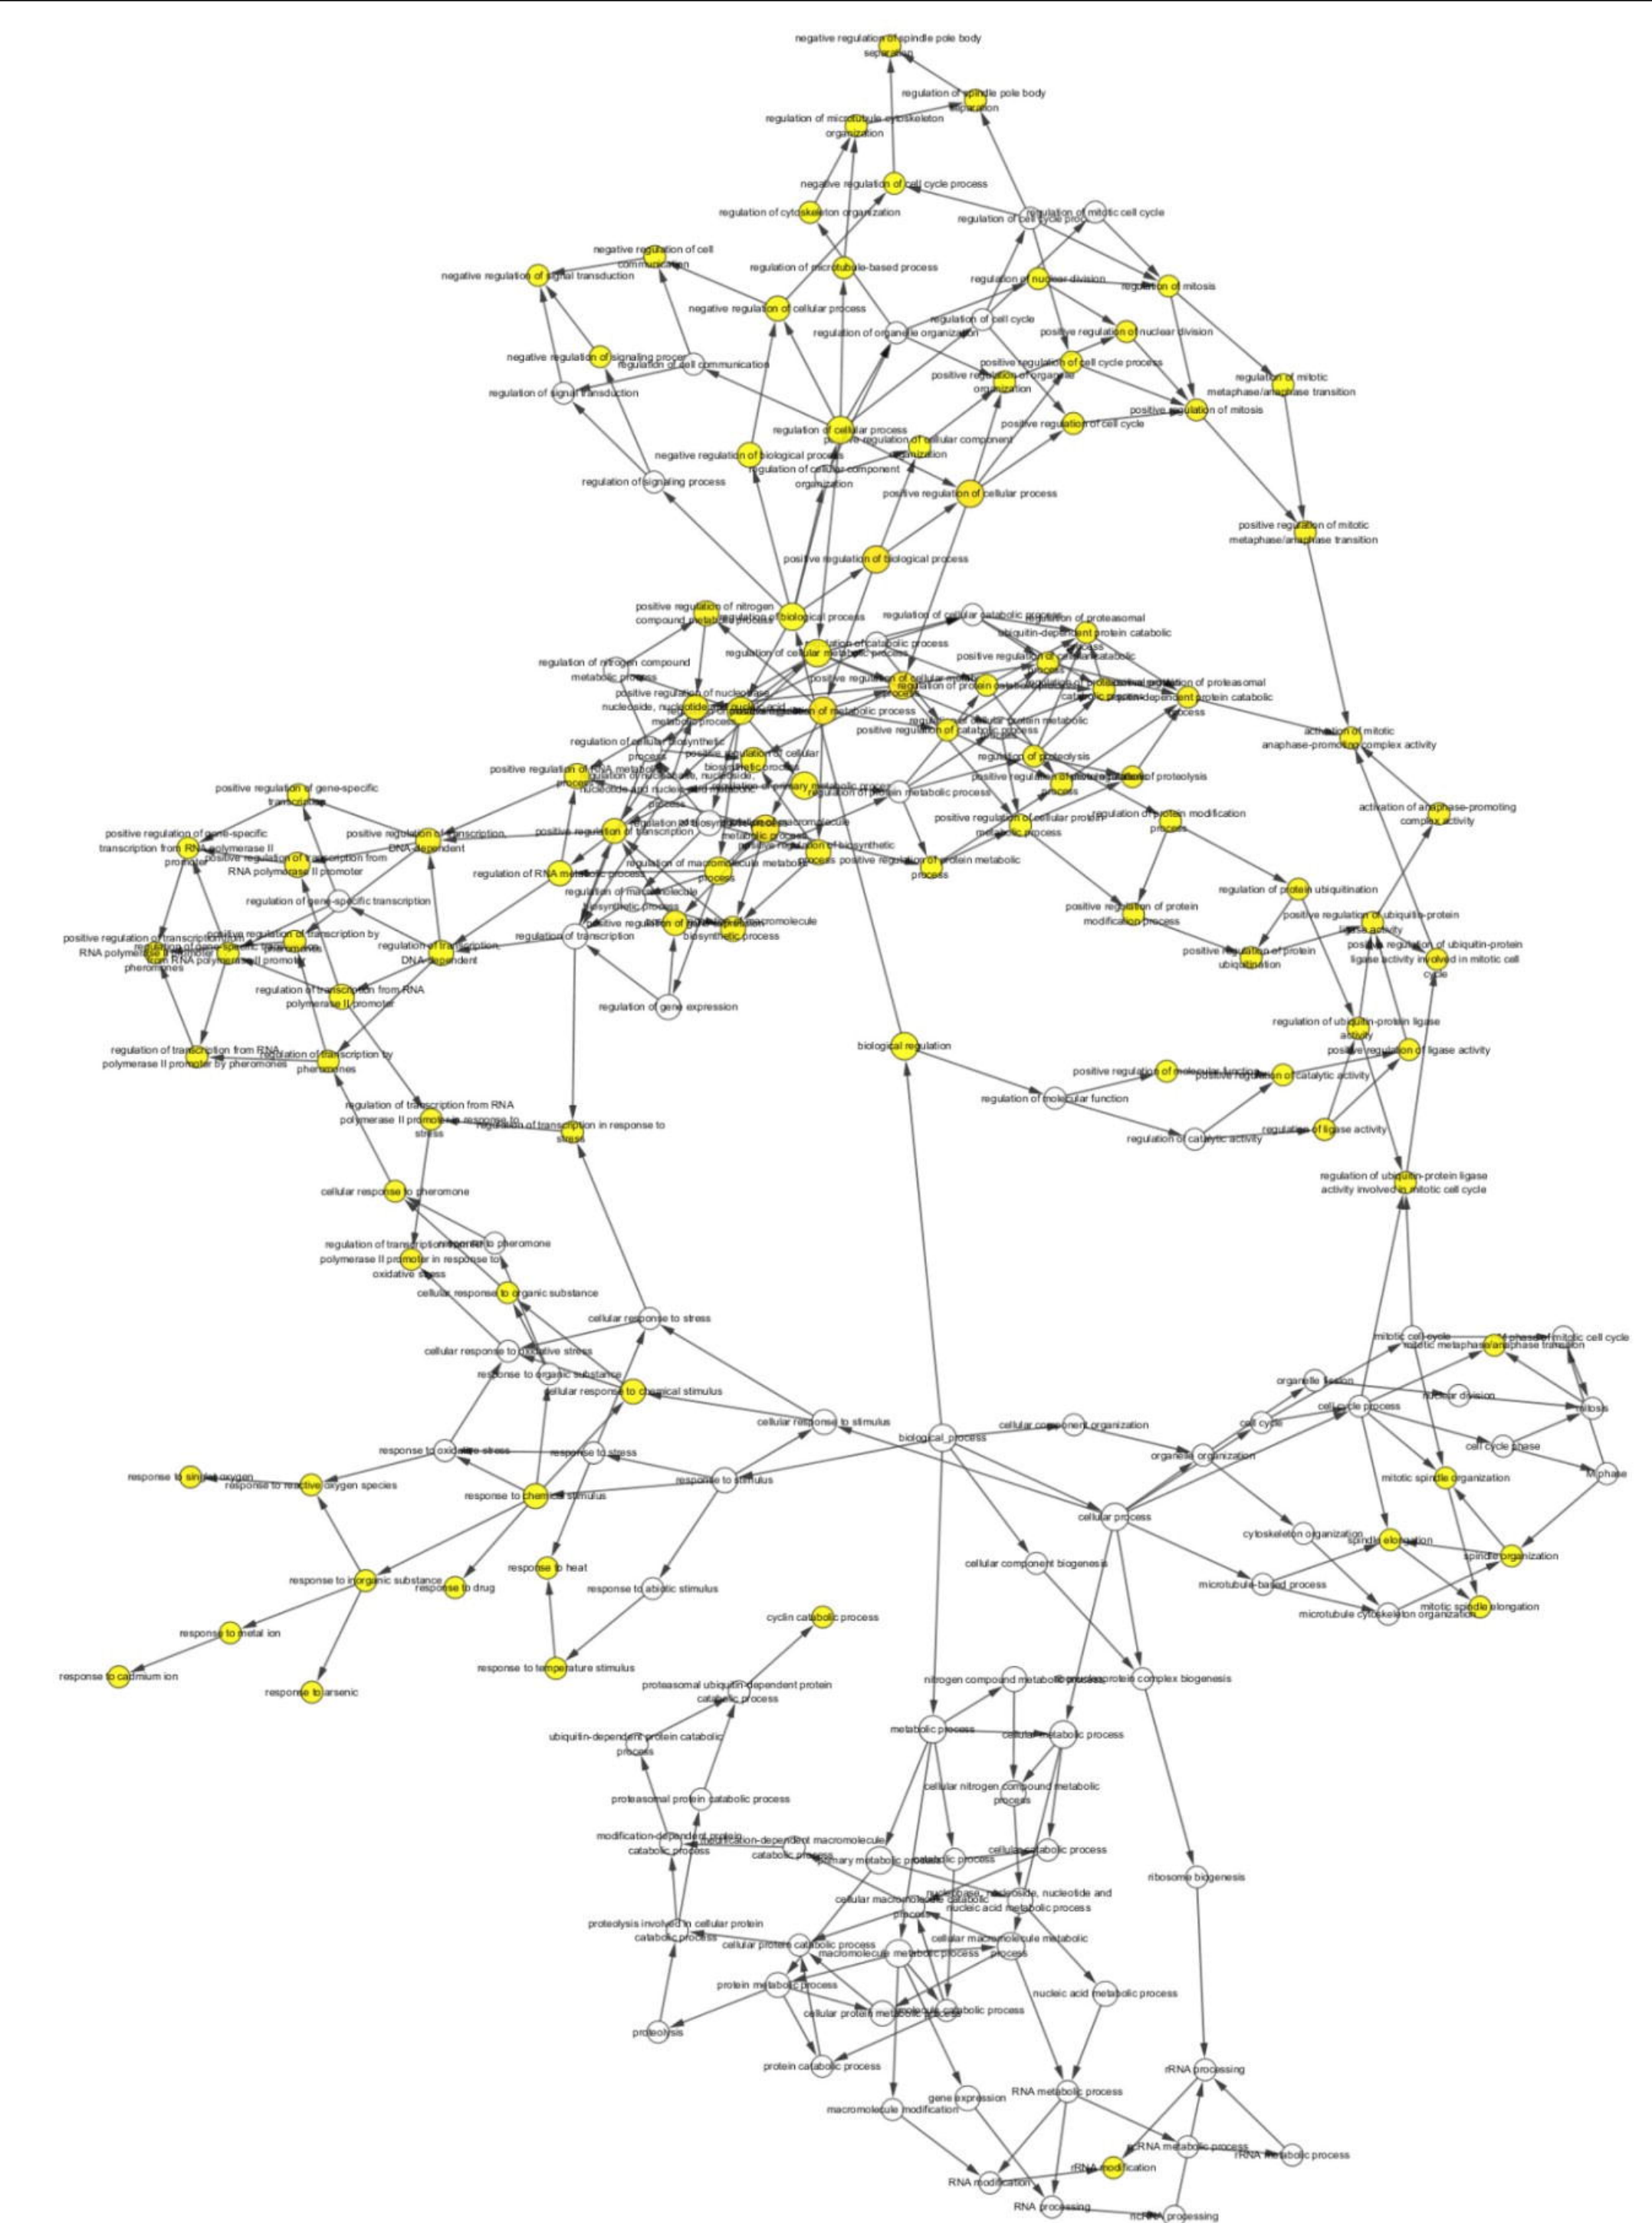

cluster4

bioRxiv preprint doi: <https://doi.org/10.1101/037531>; this version posted January 21, 2016. The copyright holder for this preprint (which was not certified by peer review) is the author/funder, who has granted bioRxiv a license to display the preprint in perpetuity. It is made available under aCC-BY-NC-ND 4.0 International license.

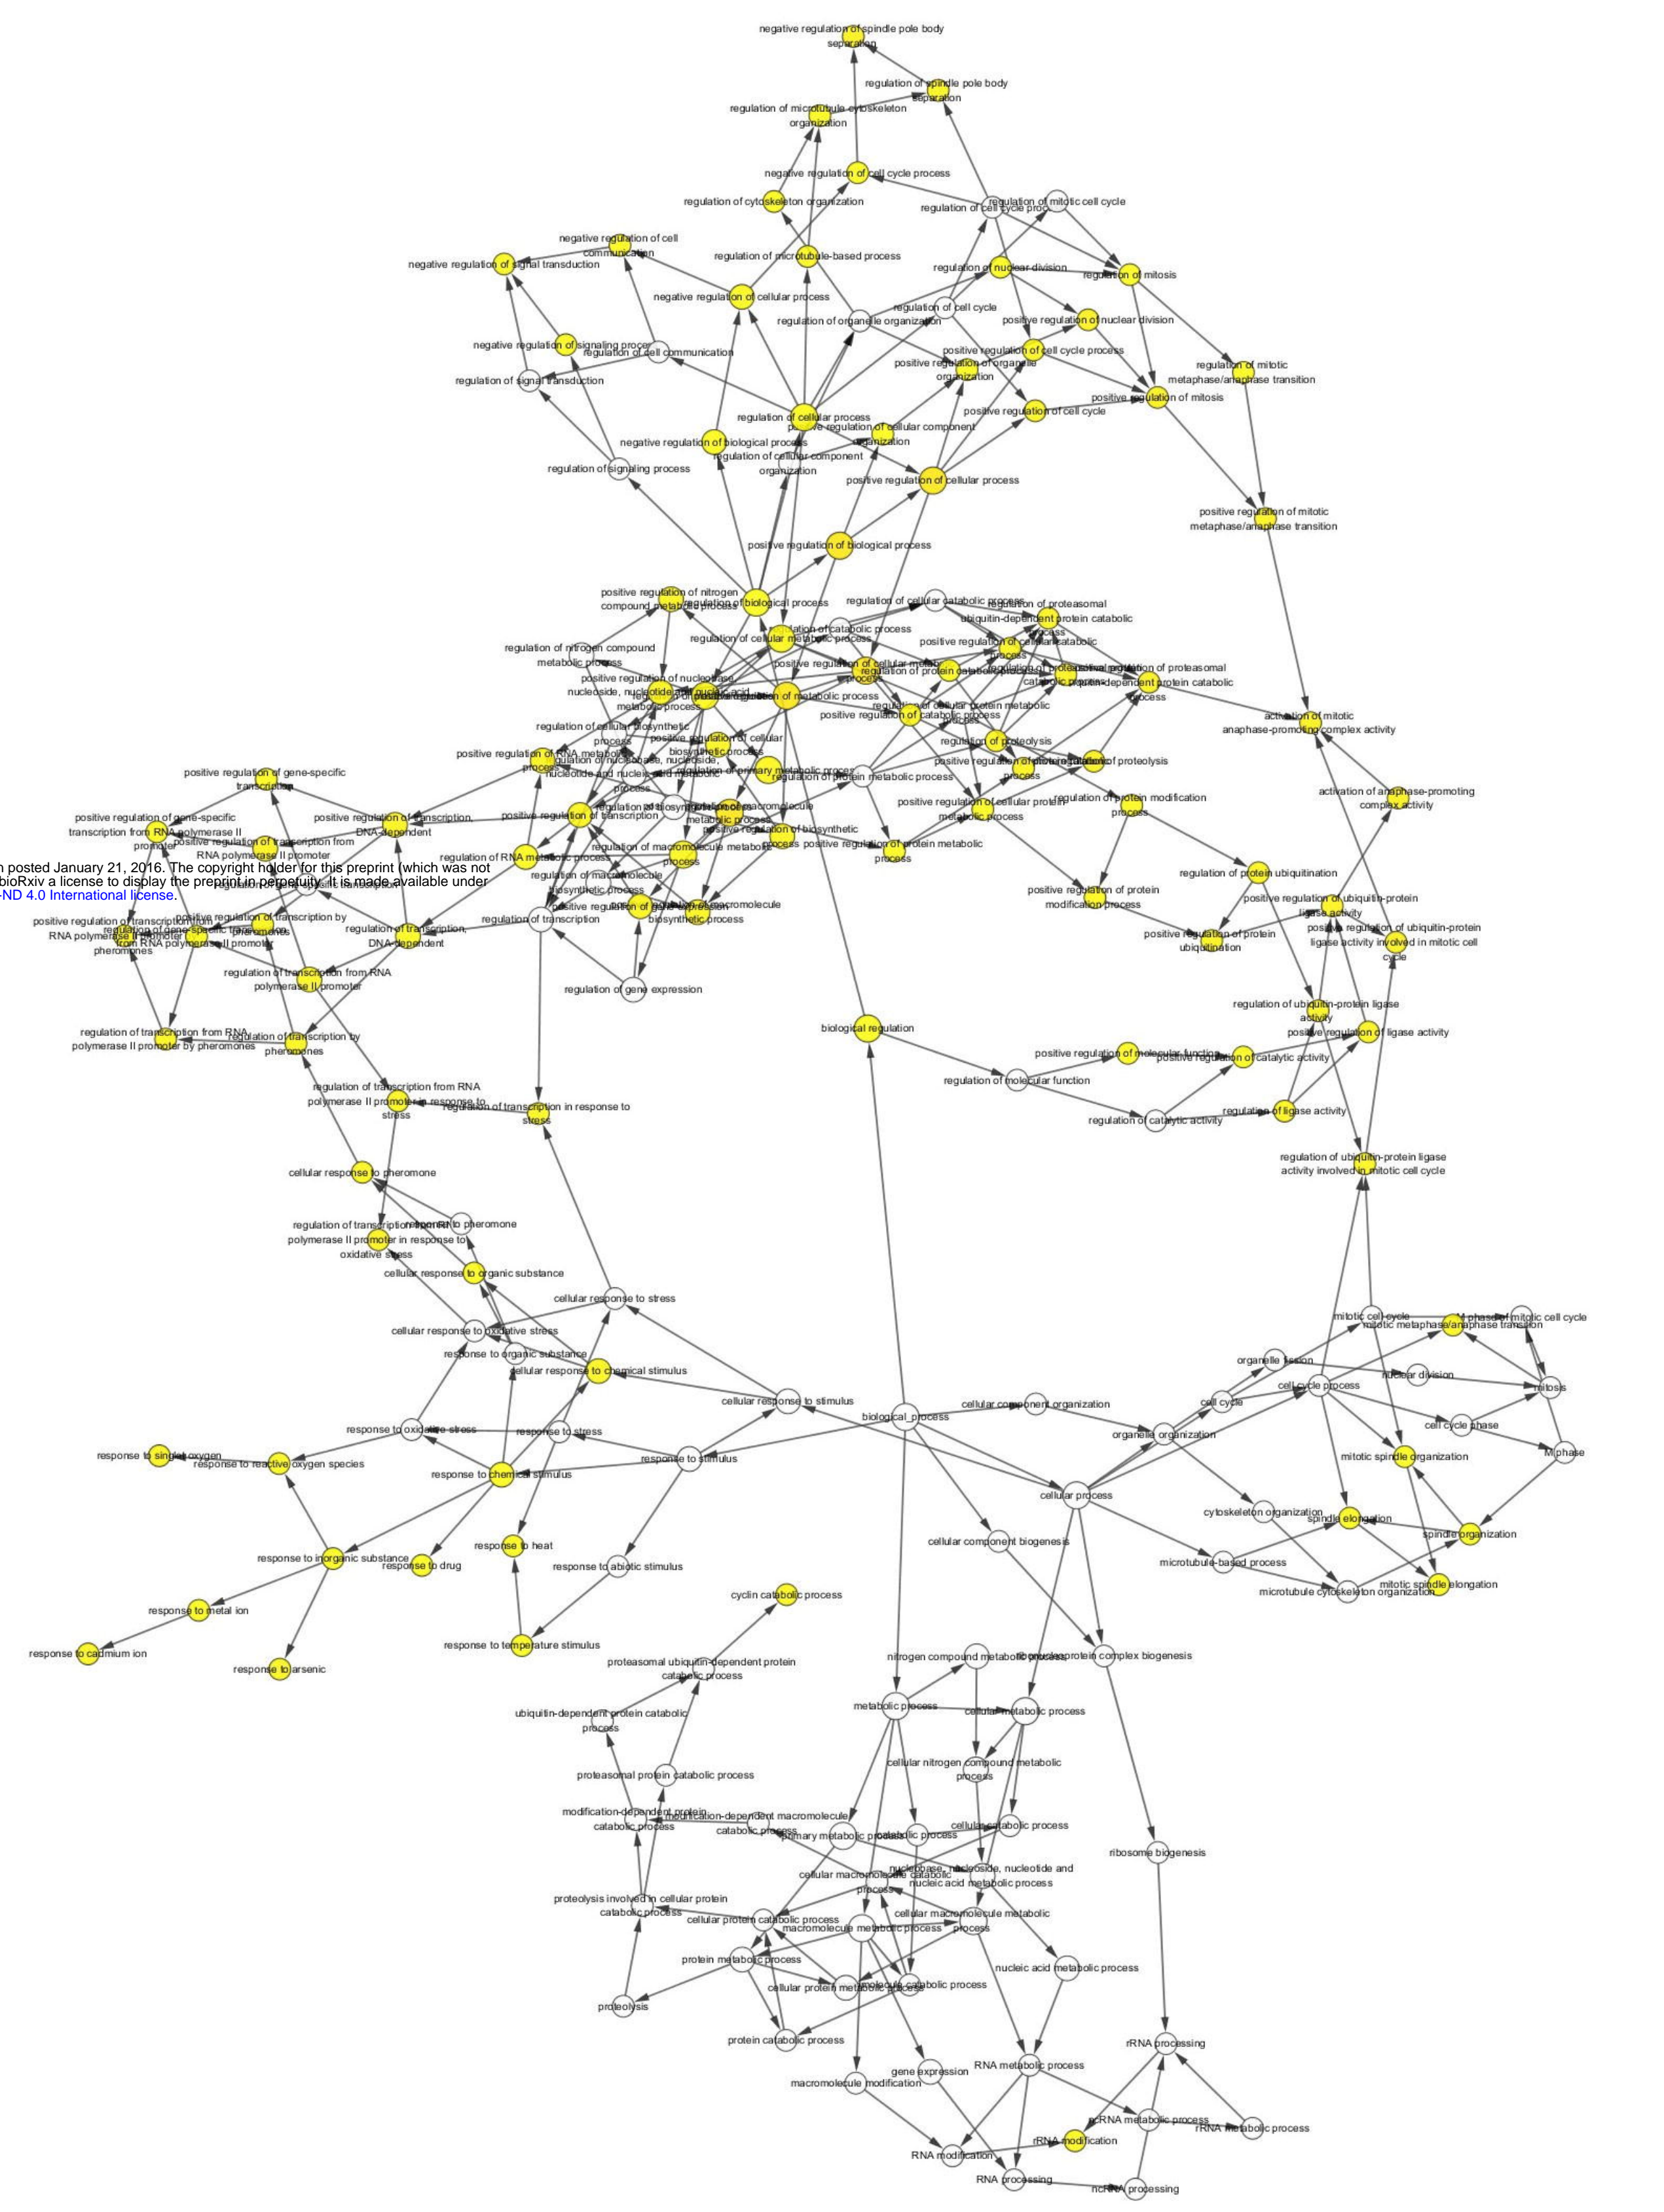

cluster6

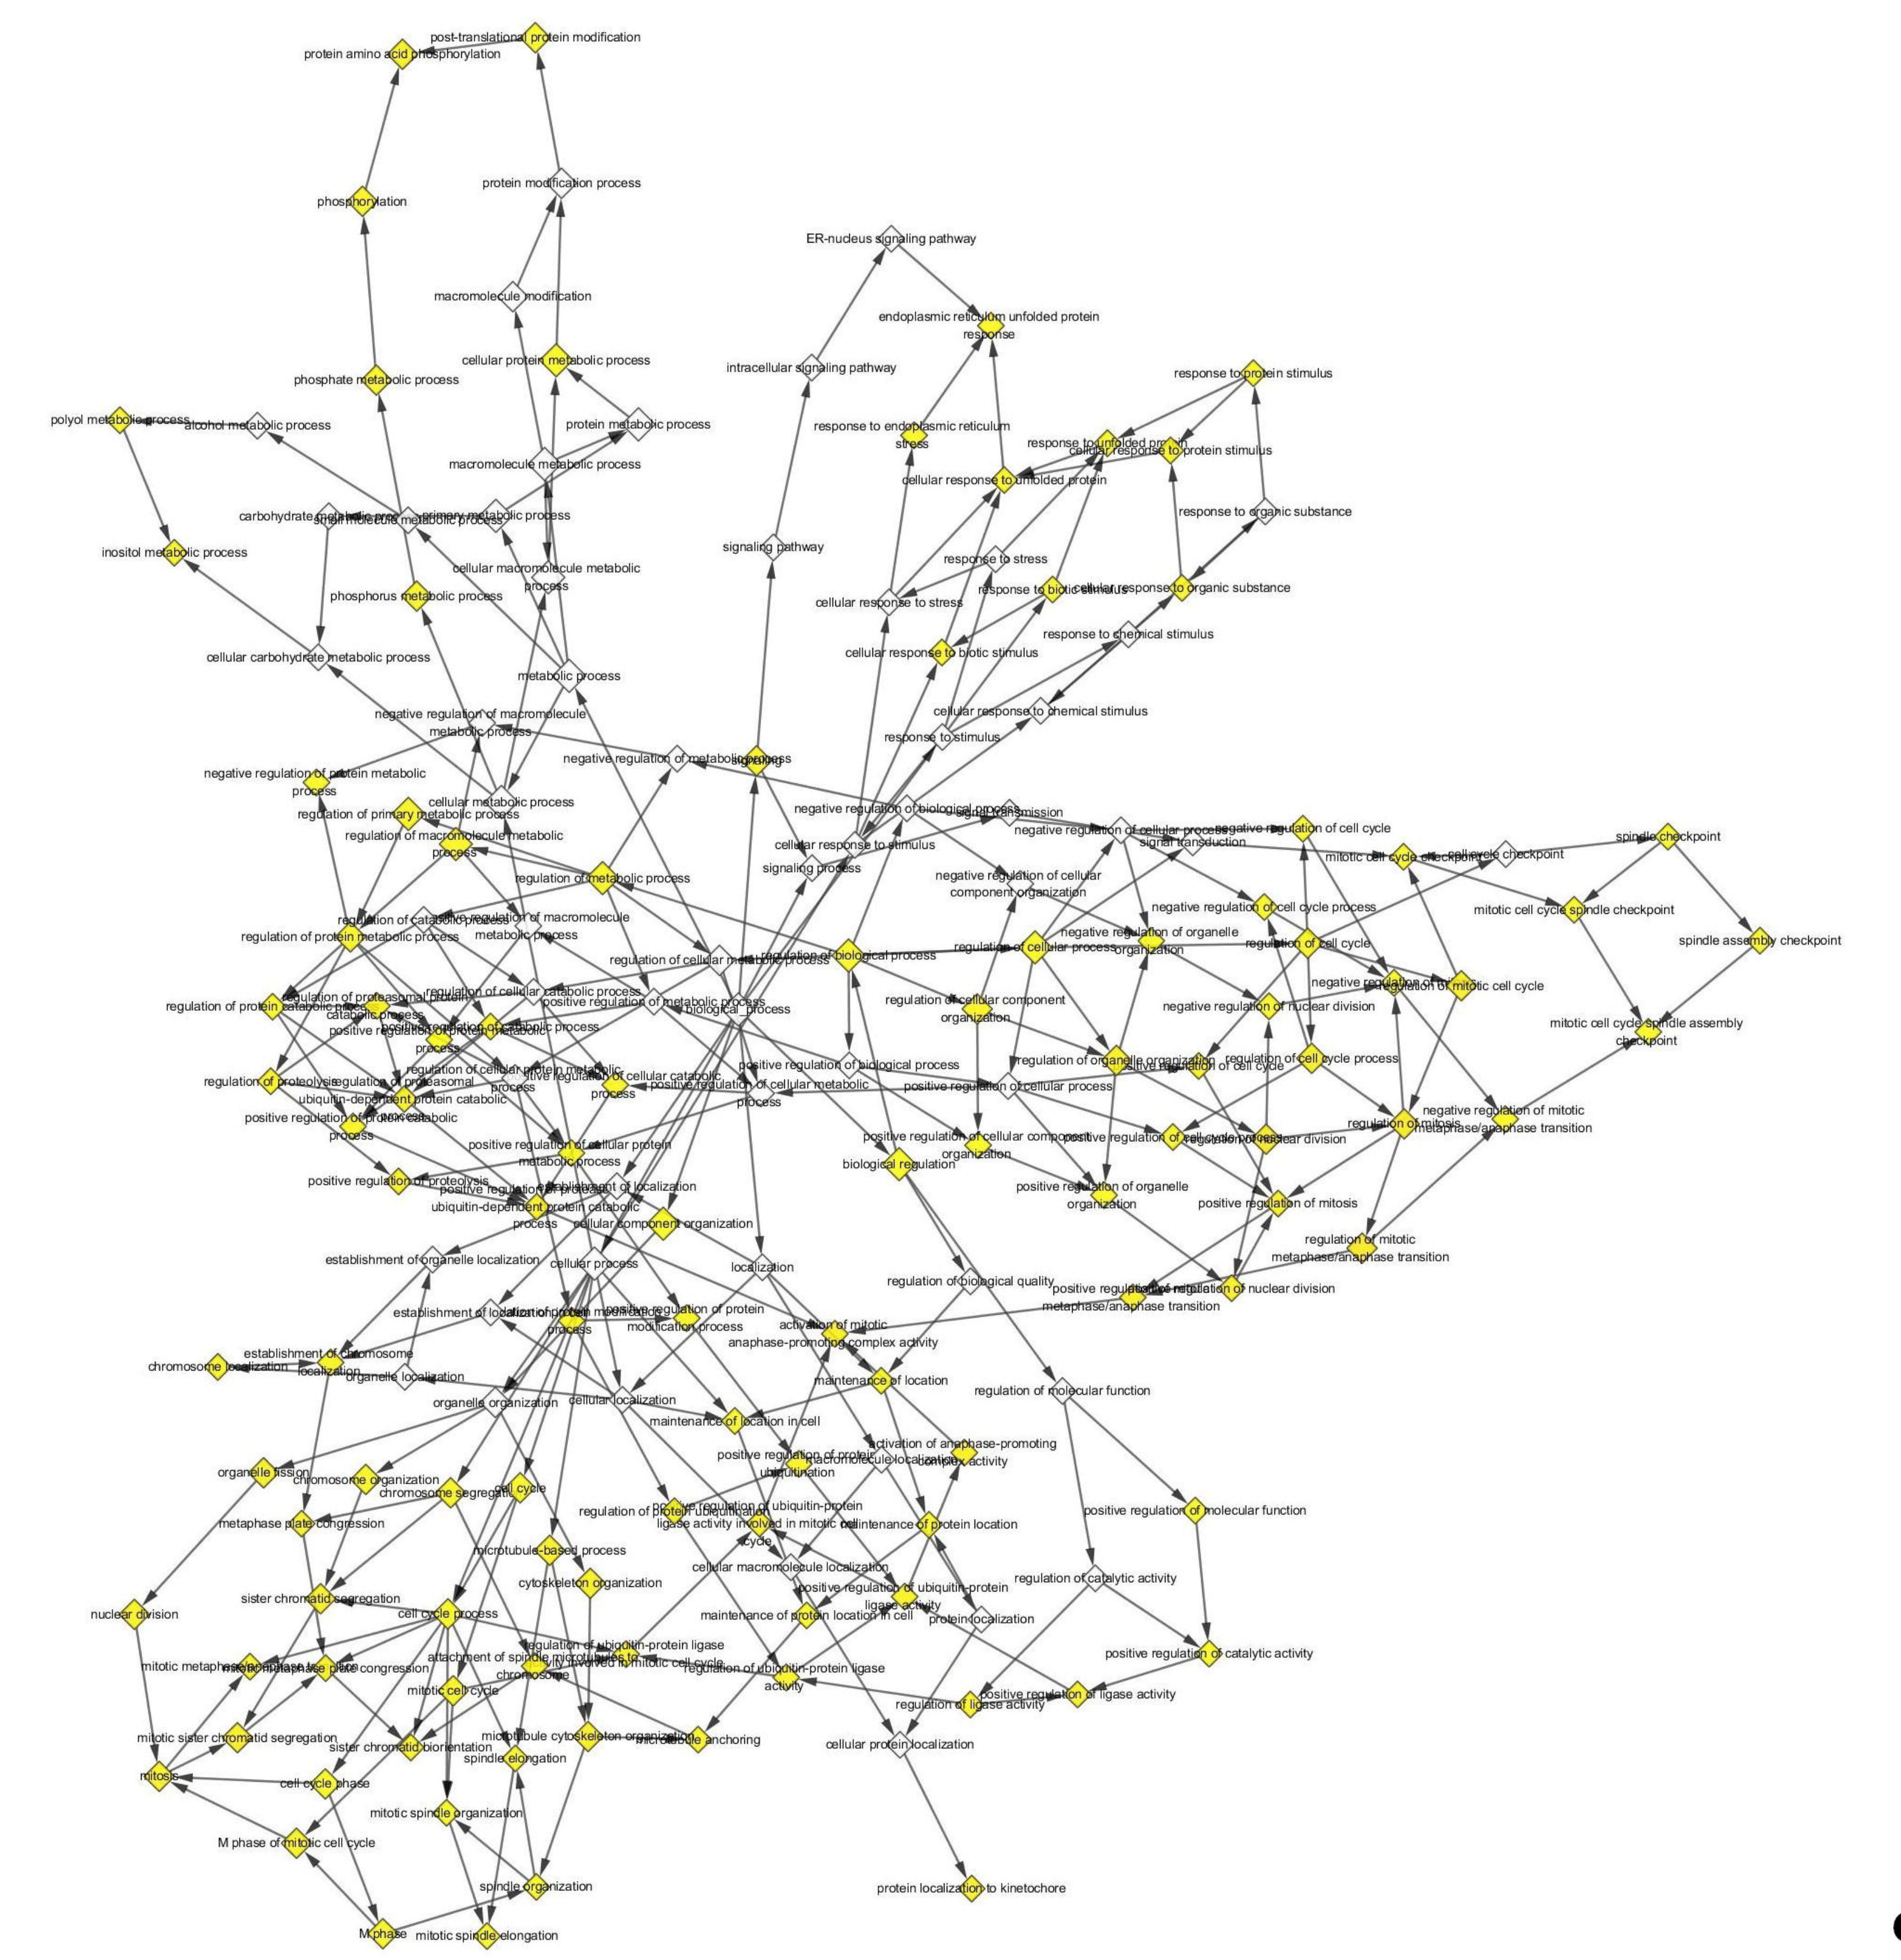

cluster7



| Symbol   | Aliases                                                                     |
|----------|-----------------------------------------------------------------------------|
| KRAS     | C-K-RAS, CFC2, K-RAS2A, K-RAS2B, K-RAS4A, K-RAS4B, KI-RAS1, KRAS2, NS, NS3, |
| HIF1A    | HIF-1A, HIF-1alpha, HIF1, HIF1-ALPHA, MOP1, PASD8, bHLHe78                  |
| TP53     | BCC7, LFS1, P53, TRP53                                                      |
| TYMS     | HST422, TMS, TS                                                             |
| EGFR     | ERBB, ERBB1, HER1, NISBD2, PIG61, mENA                                      |
| VEGFA    | MVCD1, VEGF, VPF                                                            |
| CXCL12   | IRH, PBSF, SCYB12, SDF1, TLSF, TPAR1                                        |
| SLC2A1   | CSE, DYT17, DYT18, DYT9, EIG12, GLUT, GLUT-1, GLUT1, GLUT1DS, HTLVR         |
| PROM1    | AC133, CD133, CORD12, MCDR2, MSTP061, PROML1, RP41, STGD4                   |
| ALDH1A1  | ALDC, ALDH-E1, ALDH1, ALDH11, HEL-9, HEL-S-53e, HEL12, PUMB1, RALI          |
| MTHFR    |                                                                             |
| ERBB2    | CD340, HER-2, HER-2/neu, HER2, MLN 19, NEU, NGL, TKR1                       |
| CD44     | CDW44, CSPG8, ECMR-III, HCELL, HUTCH-I, IN, LHR, MC56, MDU2, MDU3, MIC      |
| EZR      | CVIL, CVL, HEL-S-105, VIL2                                                  |
| MMP7     | MMP-7, MPPL1, PUMP-1                                                        |
| CEACAM7  | CGM2                                                                        |
| PEBP4    | CORK-1, CORK1, GWTM1933, HEL-S-300, PEBP-4, PRO4408, hPEBP4                 |
| PPARG    | CIMT1, GLM1, NR1C31, PPARG2, PPARGgamma, PPARG                              |
| CTNNB1   | CTNNB, MRD19, armadillo                                                     |
| SERPINE1 | PAI, PAI-1, PAI1, PLANH1                                                    |

|         |                                                                      |
|---------|----------------------------------------------------------------------|
| BIRC5   | API4, EPR-1                                                          |
| XRCC1   | RCC                                                                  |
| PIK3CA  | CLOVE, CWS5, MCAP, MCM, MCMTc, PI3K, p110-alpha                      |
| HRAS    | C-BAS/HAS, C-H-RAS, C-HA-RAS1, CTLO, H-RASIDX, HAMSv1, RASH1, p21ras |
| CYP2E1  | CPE1, CYP2E, P450-J, P450C2E                                         |
| EZH2    | ENX-1, ENX1, EZH1b, KMT6, KMT6A, WVS, WVS2, EZH2                     |
| MKI67   | KIA, MIB-, MIB-1, PPP1R105                                           |
| CA9     | CAIX, MN                                                             |
| CEACAM1 | BGP, BGP1, BGPI                                                      |
| DPYD    | DHP, DHPDHASE, DPD                                                   |
| TGFA    | TFGA                                                                 |
| CEACAM5 | CD66e, CEA                                                           |
| PDPK1   | PDK1, PDPK2, PDPK2P, PRO0461                                         |
| LGR5    | FEX, GPR49, GPR67, GRP49, HG38                                       |
| ETV4    | E1A-F, E1AF, PEA3, PEAS3                                             |
| APOE    | AD2, APO-E, LDLCQ5, LPG                                              |
| IL6     | BSF2, HGF, HSF, IFNB2, IL-6                                          |
| TGFB1   | CED, DPD1, LAP, TGFB, TGFBeta                                        |
| PTGS2   | COX-2, COX2, GRIPGHS, PGG/HS, PGHS-2, PHS-2, hCox-2                  |
| CRP     | PTX1                                                                 |
| IL1B    | IL-1, IL1-BETA, IL1F2                                                |

|          |                                                                                          |
|----------|------------------------------------------------------------------------------------------|
| AKT1     | AKT, CWS6, PKB, PKB-ALPHA, PRKBA, RAC, RAC-ALPHA                                         |
| VDR      | NR1I1, PPP1R163                                                                          |
| TLR4     | ARMD10, CD284, TLR-4, TOLL                                                               |
| GSTM1    | GST1-1, GSTM1a-1a, GSTM1b-1b, GTH4, GTM1, H-B, MU, MU-1, GSTM1                           |
| PTEN     | 10q23del, BZS, CWS1, DEC, GLM2, MHAM, MMAC11, TEP1, PTEN                                 |
| CDH1     | Arc-1, CD324, CDHE, ECAD, LCAM, UVO                                                      |
| TERT     | CMM9, DKCA2, DKCB4, EST2, PFBMFT1, TCS1, TP2, TRT, hEST2, hTRT                           |
| BCL2     | Bcl-2, PPP1R50                                                                           |
| CXCR4    | CD184, D2S201E, FB22, HM89, HSY3RR, LAP-3, LAP3, LCR1, LESTR, NPY3R, NPYR, NPYF<br>WHIMS |
| CCND1    | BCL1, D11S287E, PRAD1, U21B31                                                            |
| HLA-DQB1 | CELIAC1, HLA-DQB, IDDM1                                                                  |
| RELA     | NFKB3, p65                                                                               |
| CASP3    | CPP32, CPP32B, SCA-1                                                                     |
| HLA-G    | MHC-G                                                                                    |
| MAPK3    | ERK-1, ERK1, ERT2, HS44KDAP, HUMKER1A, P44ERK1, P44MAPK, PRKM3, p44-ERK                  |
| MMP1     | CLG, CLGN                                                                                |
| APC      | BTPS2, DP2, DP2.5, DP3, GS, PPP1R46                                                      |
| CYP19A1  | ARO, ARO1, CPV1, CYAR, CYP19, CYPXIX, P-450AROM                                          |
| ERCC2    | COFS2, EM9, TFIIH, TTD, TTD1, XPD                                                        |
| TCF7L2   | TCF-4, TCF4                                                                              |

|        |                                                                                               |
|--------|-----------------------------------------------------------------------------------------------|
| F3     | CD142, TF, TFA                                                                                |
| TP73   | P73                                                                                           |
| LCN2   | 24p3, MSFI, NGAL                                                                              |
| RUNX1  | AML1, AML1-EVI-1, AMLCR1, CBF2alpha, CBFA2, EVI-1, PEBP2aB, PEBP2a                            |
| FGFR2  | BBDS, BEK, BFR-1, CD332, CEK3, CFD1, ECT1, JWS, K-SAM, KGFR, TK14, 1                          |
| CHEK2  | CDS1, CHK2, HuCds1, LFS2, PP1425, RAD53, hCds1                                                |
| PLAU   | ATF, BDPLT5, QPD, UPA, URK, u-PA                                                              |
| TIMP1  | CLGI, EPA, EPO, HCI, TIMP                                                                     |
| RAD51  | BRCC5, FANCR, HRAD51, HsRad51, HsT16930, MRMV2A, RECA, RAD51                                  |
| PLK1   | PLK, STPK13                                                                                   |
| POU5F1 | OCT3, OCT4, OTF-3, OTF3, OTF4, Oct-3, Oct-4                                                   |
| XRCC3  | CMM6                                                                                          |
| SOX2   | ANOP3, MCOPS3                                                                                 |
| PDGFRB | CD140B, IBGC4, IMF1, JTK12, PDGFR, PDGFR-1, PDGFR1                                            |
| STK11  | LKB1, PJS, hLKB1                                                                              |
| DKK1   | DKK-1, SK                                                                                     |
| EPAS1  | ECYT4, HIF2A, HLF, MOP2, PASD2, bHLHe73                                                       |
| CFLAR  | CASH, CASP8AP1, CLARP, Casper, FLAME, FLAME-1, FLAME1, FLIP, I-FLICE, MRIT, c-FLIF<br>c-FLIPS |
| FOS    | AP-1, C-FOS, p55                                                                              |
| SKP2   | FBL1, FBXL1, FLB1, p45                                                                        |



|         |                                                                            |
|---------|----------------------------------------------------------------------------|
| NRAS    | ALPS4, CMNS, N-ras, NCMS1, NS6, NRAS                                       |
| CCNE1   | CCNE, pCCNE1                                                               |
| IL23R   |                                                                            |
| PPARD   | FAAR, NR1C2, NUC1, NUCI, NUCII, PPARB                                      |
| RPS6KB1 | PS6K, S6K, S6K-beta-1, S6K1, STK14A, p70 S6KA, p70(S6K)-alpha, p70-S6K, p7 |
| ANXA1   | ANX1, LPC1                                                                 |
| PTGS1   | COX1, COX3, PCOX1, PES-1, PGG/HS, PGHS-1, PGHS1, PHS1, PTGHS               |
| BLM     | BS, RECQ2, RECQL2, RECQL3                                                  |
| CD163   | M130, MM130                                                                |
| SPINK1  | PCTT, PSTI, Spink3, TATI, TCP                                              |
| CLDN1   | CLD1, ILVASC, SEMP1                                                        |
| PDCD4   | H731                                                                       |
| IFNGR1  | CD119, IFNGR, IMD27A, IMD27B                                               |
| IL24    | C49A, FISP, IL10B, MDA7, MOB5, ST16                                        |
| ABCC4   | MOAT-B, MOATB, MRP4                                                        |
| ALOX12  | 12-LOX, 12S-LOX, LOG12                                                     |
| BIRC7   | KIAP, LIVIN, ML-IAP, MLIAP, RNF50                                          |
| SATB1   |                                                                            |
| TFF3    | ITF, P1B, TFI                                                              |
| CSF3R   | CD114, GCSFR                                                               |
| RBL2    | P130, Rb2                                                                  |

|          |                                                                                  |
|----------|----------------------------------------------------------------------------------|
| RPS6KA1  | HU-1, MAPKAPK1A, RSK, RSK1, p90Rsk                                               |
| FIGF     | VEGF-D, VEGFD                                                                    |
| TPSAB1   | TPS1, TPS2, TPSB1                                                                |
| GSK3A    |                                                                                  |
| ABCC3    | ABC31, EST90757, MLP2, MOAT-D, MRP3, cMOAT2                                      |
| MIR137   | MIRN137, miR-137                                                                 |
| TAZ      | BTHS, CMD3A, EFE, EFE2, G4.5, LVNCX, Taz1                                        |
| UGT2B15  | HLUG4, UDPGT 2B8, UDPGT2B15, UDPGTH3, UGT2B8                                     |
| PPP1R13L | IASPP, NKIP1, RAI, RAI4                                                          |
| REG4     | GISP, REG-IV, RELP                                                               |
| WISP1    | CCN4c, WISP1i, WISP1tc, WISP1                                                    |
| ASNS     | ASNSD, TS11                                                                      |
| UMPS     | OPRT                                                                             |
| F2RL2    | PAR-3, PAR3                                                                      |
| LIMS1    | PINCH, PINCH-1, PINCH1                                                           |
| MUC6     | MUC-6                                                                            |
| RSF1     | HBXAP, RSF-1, XAP8, p325                                                         |
| MYCL     | L-Myc, LMYC1, bHLHe38, MYCL                                                      |
| RPS6KB2  | KLS, P70-beta, P70-beta-1, P70-beta-2, S6K-beta2, S6K2, SRK, STK14B, p70(S6K)-be |
| RNF7     | CKBBP1, ROC2, SAG                                                                |
| RPS6KA2  | HU-2, MAPKAPK1C, RSK, RSK3, S6K-alpha, S6K-alpha2, p90-RSK3, pp90Rsk             |

SPARCL1

MAST 9, MAST9, FIG33, SC1

SPEN

HIAA0929, MINT, RBM15C, SHARP

SEMA4C

M-SEMA-F, SEMACL1, SEMAF, SEMAI

DNAJC12

JDP1

| Category        | Term                                                                                | PValue      | Genes                                                                                                      | FDR         |
|-----------------|-------------------------------------------------------------------------------------|-------------|------------------------------------------------------------------------------------------------------------|-------------|
| cluster1        |                                                                                     |             |                                                                                                            |             |
| KEGG_PATHWAY    | hsa04360:Axon guidance                                                              | 0.006073822 | SEMA6A, PTK2, SEMA3B                                                                                       | 3.843791544 |
| EC_NUMBER       | 3.4.21.-                                                                            | 0.009036531 | HTRA1, KLK11, TMPRSS4                                                                                      | 4.848129606 |
| PANTHER_PATHWAY | P00004:Alzheimer disease-presenilin pathway                                         | 0.019326937 | BACE2, MMP16, KAT5                                                                                         | 11.44756514 |
| cluster2        |                                                                                     |             |                                                                                                            |             |
| KEGG_PATHWAY    | hsa04630:Jak-STAT signaling pathway                                                 | 3.32E-22    | IL23R, IL6ST, SOCS1, STAT1, TYK2, IL12RB2, STAT4, IL23A, IL12RB1, IFNG, IL12A, JAK2, IL12B, IFNGR2, IFNGR1 | 2.53E-19    |
| BIOCARTA        | h_no2il12Pathway:N O2-dependent IL 12 Pathway in NK cells                           | 1.28E-10    | IL12RB2, TYK2, STAT4, IL12RB1, IFNG, IL12A, JAK2                                                           | 1.10E-07    |
| BIOCARTA        | h_th1th2Pathway:Th1/Th2 Differentiation                                             | 2.81E-09    | IL12RB2, IL12RB1, IFNG, IL12A, IL12B, IFNGR2, IFNGR1                                                       | 2.42E-06    |
| BIOCARTA        | h_IL12Pathway:IL12 and Stat4 Dependent Signaling Pathway in Th1 Development         | 2.81E-09    | IL12RB2, TYK2, STAT4, IL12RB1, IFNG, IL12A, JAK2                                                           | 2.42E-06    |
| KEGG_PATHWAY    | hsa04060:Cytokine-cytokine receptor interaction                                     | 3.57E-09    | IL12RB2, IL23A, IL12RB1, IL23R, IL6ST, IFNG, IL12A, IL12B, IFNGR2, IFNGR1                                  | 2.72E-06    |
| BIOCARTA        | h_ifngPathway:IFN gamma signaling pathway                                           | 4.16E-08    | IFNG, JAK2, STAT1, IFNGR2, IFNGR1                                                                          | 3.57E-05    |
| BIOCARTA        | h_nktPathway:Selective expression of chemokine receptors during T-cell polarization | 7.64E-07    | IL12RB2, IL12RB1, IFNG, IL12A, IFNGR2, IFNGR1                                                              | 6.57E-04    |
| PANTHER_PATHWAY | P00035:Interferon-gamma signaling pathway                                           | 6.85E-06    | IFNG, JAK2, STAT1, IFNGR2, IFNGR1                                                                          | 0.004406679 |
| PANTHER_PATHWAY | P00038:JAK/STAT signaling pathway                                                   | 8.34E-05    | STAT4, SOCS1, JAK2, STAT1                                                                                  | 0.053656257 |
| BBID            | 12.IL-6_type_cytokine-signaling-transduct                                           | 8.71E-05    | TYK2, IL6ST, SOCS1, JAK2, STAT1                                                                            | 0.07288153  |
| PANTHER_PATHWAY | P00036:Interleukin signaling pathway                                                | 9.85E-05    | IL12RB2, STAT4, IL23A, IL12RB1, IL6ST, IL12A, STAT1                                                        | 0.063347144 |
| BIOCARTA        | h_tidPathway:Chaper                                                                 | 2.84E-04    | IFNG, JAK2, IFNGR2, IFNGR1                                                                                 | 0.243475935 |

|                      |                                                               |             |                                                                                                                                                          |             |
|----------------------|---------------------------------------------------------------|-------------|----------------------------------------------------------------------------------------------------------------------------------------------------------|-------------|
|                      | ones modulate                                                 |             |                                                                                                                                                          |             |
|                      | interferon Signaling                                          |             |                                                                                                                                                          |             |
|                      | Pathway                                                       |             |                                                                                                                                                          |             |
| BBID                 | 48.mice_minus_JAKs<br>_and_STATs                              | 7.11E-04    | TYK2, STAT4, JAK2, STAT1                                                                                                                                 | 0.593475439 |
|                      | P00031:Inflammation                                           |             |                                                                                                                                                          |             |
| PANTHER_<br>PATHWAY  | mediated by<br>chemokine and<br>cytokine signaling<br>pathway | 7.32E-04    | TYK2, STAT4, IFNG, JAK2, STAT1, IFNGR2,<br>IFNGR1                                                                                                        | 0.470260756 |
| BBID                 | 75.Stats_activators_o<br>f_Apoptosis                          | 0.00193497  | IFNG, JAK2, STAT1                                                                                                                                        | 1.607237902 |
| KEGG_PAT<br>HWAY     | hsa05330:Allograft<br>rejection                               | 0.004204138 | IFNG, IL12A, IL12B                                                                                                                                       | 3.155617774 |
| KEGG_PAT<br>HWAY     | hsa04940:Type I<br>diabetes mellitus                          | 0.005691714 | IFNG, IL12A, IL12B                                                                                                                                       | 4.251279397 |
| EC_NUMBE<br>R        | 2.7.10.2                                                      | 0.009766127 | TYK2, JAK2                                                                                                                                               | 0.976612696 |
| cluster3             |                                                               |             |                                                                                                                                                          |             |
| REACTOME<br>_PATHWAY | REACT_15518:Trans<br>membrane transport<br>of small molecules | 1.40E-04    | SLC38A2, SLC7A1, SLC7A5, SLC7A11                                                                                                                         | 0.07222524  |
| REACTOME<br>_PATHWAY | REACT_13:Metabolis<br>m of amino acids                        | 5.32E-04    | SLC38A2, SLC7A1, ASNS, SLC7A5,<br>SLC7A11                                                                                                                | 0.274131661 |
| cluster4             |                                                               |             |                                                                                                                                                          |             |
| KEGG_PAT<br>HWAY     | hsa05200:Pathways<br>in cancer                                | 8.49E-14    | EGFR, CEBPA, IL6, EPAS1, STAT5A, MET,<br>TP53, KITLG, CDH1, BIRC5, NFKB1, RB1,<br>TGFB1, AKT1, MAPK1, NRAS, LAMB4,<br>CDKN2A, HIF1A, KRAS, VEGFA, PIK3CA | 9.07E-11    |
| KEGG_PAT<br>HWAY     | hsa05219:Bladder<br>cancer                                    | 6.35E-11    | EGFR, NRAS, MAPK1, CDKN2A, KRAS,<br>VEGFA, TP53, CDH1, RB1, THBS1                                                                                        | 6.79E-08    |
| KEGG_PAT<br>HWAY     | hsa05218:Melanoma                                             | 4.01E-10    | EGFR, AKT1, NRAS, MAPK1, CDKN2A,<br>KRAS, MET, TP53, PIK3CA, CDH1, RB1                                                                                   | 4.29E-07    |
| KEGG_PAT<br>HWAY     | hsa05212:Pancreatic<br>cancer                                 | 4.63E-10    | EGFR, AKT1, MAPK1, CDKN2A, KRAS,<br>VEGFA, TP53, PIK3CA, NFKB1, RB1,<br>TGFB1                                                                            | 4.94E-07    |
| KEGG_PAT<br>HWAY     | hsa05220:Chronic<br>myeloid leukemia                          | 7.02E-10    | AKT1, NRAS, MAPK1, CDKN2A, KRAS,<br>STAT5A, TP53, PIK3CA, NFKB1, RB1,<br>TGFB1                                                                           | 7.50E-07    |
| KEGG_PAT<br>HWAY     | hsa05211:Renal cell<br>carcinoma                              | 7.70E-09    | AKT1, NRAS, MAPK1, HIF1A, KRAS,<br>EPAS1, MET, VEGFA, PIK3CA, TGFB1                                                                                      | 8.23E-06    |
| KEGG_PAT<br>HWAY     | hsa05223:Non-small<br>cell lung cancer                        | 1.81E-08    | EGFR, AKT1, NRAS, MAPK1, CDKN2A,<br>KRAS, TP53, PIK3CA, RB1                                                                                              | 1.93E-05    |

|                  |                                                    |          |                                                                                        |             |
|------------------|----------------------------------------------------|----------|----------------------------------------------------------------------------------------|-------------|
| KEGG_PATHWAY     | hsa05214:Glioma                                    | 6.34E-08 | EGFR, AKT1, NRAS, MAPK1, CDKN2A, KRAS, TP53, PIK3CA, RB1                               | 6.78E-05    |
| PANTHER_PATHWAY  | P04398:p53 pathway feedback loops 2                | 2.17E-07 | AKT1, NRAS, CDKN2A, KRAS, MAPK14, TP53, PIK3CA, RB1, TP73                              | 1.98E-04    |
| KEGG_PATHWAY     | hsa05213:Endometrial cancer                        | 3.04E-07 | EGFR, AKT1, NRAS, MAPK1, KRAS, TP53, PIK3CA, CDH1                                      | 3.25E-04    |
| KEGG_PATHWAY     | hsa05210:Colorectal cancer                         | 6.20E-07 | EGFR, AKT1, MAPK1, KRAS, MET, TP53, PIK3CA, BIRC5, TGFB1                               | 6.62E-04    |
| KEGG_PATHWAY     | hsa05221:Acute myeloid leukemia                    | 6.57E-07 | CEBPA, AKT1, NRAS, MAPK1, KRAS, STAT5A, PIK3CA, NFKB1                                  | 7.01E-04    |
| KEGG_PATHWAY     | hsa05215:Prostate cancer                           | 9.71E-07 | EGFR, AKT1, NRAS, MAPK1, KRAS, TP53, PIK3CA, NFKB1, RB1                                | 0.001037757 |
| KEGG_PATHWAY     | hsa04722:Neurotrophin signaling pathway            | 1.17E-06 | AKT1, NRAS, MAPK1, BDNF, KRAS, MAPK14, TP53, PIK3CA, NFKB1, TP73                       | 0.00125362  |
| KEGG_PATHWAY     | hsa04010:MAPK signaling pathway                    | 2.69E-06 | EGFR, AKT1, MAPK1, NRAS, BDNF, KRAS, ARRB2, MAPK14, GADD45G, TP53, NFKB1, TGFB1, RASA1 | 0.002871532 |
| KEGG_PATHWAY     | h_erythPathway:Erythrocyte Differentiation Pathway | 3.22E-06 | IL3, IL6, IL9, KITLG, TGFB1, EPO                                                       | 0.003887971 |
| REACTOME_PATHWAY | REACT_16888:Signaling by PDGF                      | 9.59E-06 | NRAS, MAPK1, KRAS, STAT5A, PIK3CA, THBS1, RASA1                                        | 0.007693883 |
| PANTHER_PATHWAY  | P00056:VEGF signaling pathway                      | 1.68E-05 | AKT1, NRAS, MAPK1, HIF1A, KRAS, MAPK14, VEGFA, PIK3CA                                  | 0.015328038 |
| EC_NUMBER        | 3.4.21.59                                          | 4.75E-05 | TPSAB1, TPSB2, TPSD1, TPSG1                                                            | 0.030526793 |
| KEGG_PATHWAY     | hsa04370:VEGF signaling pathway                    | 4.94E-05 | AKT1, NRAS, MAPK1, KRAS, MAPK14, VEGFA, PIK3CA                                         | 0.052708911 |
| REACTOME_PATHWAY | REACT_11061:Signaling by NGF                       | 5.63E-05 | AKT1, MAG, NRAS, MAPK1, KRAS, MAPK14, PIK3CA, NFKB1, SORCS3                            | 0.045131702 |
| KEGG_PATHWAY     | hsa04664:Fc epsilon RI signaling pathway           | 6.17E-05 | AKT1, NRAS, MAPK1, IL3, KRAS, MAPK14, PIK3CA                                           | 0.065876411 |
| KEGG_PATHWAY     | hsa04150:mTOR signaling pathway                    | 9.18E-05 | AKT1, MAPK1, HIF1A, STK11, VEGFA, PIK3CA                                               | 0.097993218 |
| PANTHER_PATHWAY  | P00005:Angiogenesis                                | 9.21E-05 | AKT1, NRAS, MAPK1, NOTCH1, HIF1A, KRAS, MAPK14, VEGFA, PIK3CA, BIRC5, RASA1            | 0.084242254 |
| PANTHER_PATHWAY  | P00018:EGF receptor signaling pathway              | 1.11E-04 | EGFR, AKT1, NRAS, MAPK1, KRAS, MAPK14, STAT5A, PIK3CA, RASA1                           | 0.101309728 |
| KEGG_PATHWAY     | hsa04012:ErbB                                      | 1.14E-04 | EGFR, AKT1, NRAS, MAPK1, KRAS,                                                         | 0.121813791 |

|                  |                                                                          |             |                                                           |             |
|------------------|--------------------------------------------------------------------------|-------------|-----------------------------------------------------------|-------------|
| HWAY             | signaling pathway                                                        |             | STAT5A, PIK3CA                                            |             |
| KEGG_PAT         | hsa05216:Thyroid                                                         | 1.18E-04    | NRAS, MAPK1, KRAS, TP53, CDH1                             | 0.126019896 |
| HWAY             | cancer                                                                   |             |                                                           |             |
|                  | h_hcmvPathway:Human Cytomegalovirus and Map Kinase Pathways              |             |                                                           |             |
| BIOCARTA         |                                                                          | 1.34E-04    | AKT1, MAPK1, MAPK14, NFKB1, RB1                           | 0.161807042 |
| KEGG_PAT         | hsa04115:p53                                                             | 3.30E-04    | CDKN2A, GADD45G, RPRM, TP53, THBS1, TP73                  | 0.352478227 |
| HWAY             | signaling pathway                                                        |             |                                                           |             |
| KEGG_PAT         | hsa04660:T cell receptor signaling                                       | 3.75E-04    | AKT1, NRAS, MAPK1, KRAS, MAPK14, PIK3CA, NFKB1            | 0.399792892 |
| HWAY             | pathway                                                                  |             |                                                           |             |
|                  | h_telPathway:Telomeres, Telomerase, Cellular Aging, and Immortality      |             |                                                           |             |
| BIOCARTA         |                                                                          | 3.86E-04    | EGFR, AKT1, KRAS, TP53, RB1                               | 0.465899729 |
| PANTHER_PATHWAY  | P04393:Ras Pathway                                                       | 3.87E-04    | AKT1, NRAS, MAPK1, CDKN2A, KRAS, MAPK14, PIK3CA           | 0.353518988 |
| REACTOME_PATHWAY | REACT_9417:Signaling by EGFR                                             | 5.16E-04    | EGFR, NRAS, MAPK1, KRAS, PIK3CA                           | 0.413199584 |
| KEGG_PAT         | hsa04662:B cell receptor signaling                                       | 5.22E-04    | AKT1, NRAS, MAPK1, KRAS, PIK3CA, NFKB1                    | 0.556225736 |
| HWAY             | pathway                                                                  |             |                                                           |             |
| KEGG_PAT         | hsa05222:Small cell lung cancer                                          | 8.79E-04    | AKT1, LAMB4, TP53, PIK3CA, NFKB1, RB1                     | 0.934847379 |
| HWAY             | pathway                                                                  |             |                                                           |             |
|                  | h_RacCycDPathway:Influence of Ras and Rho proteins on G1 to S Transition |             |                                                           |             |
| BIOCARTA         |                                                                          | 0.001228749 | AKT1, MAPK1, PIK3CA, NFKB1, RB1                           | 1.475202636 |
| KEGG_PAT         | hsa04320:Dorso-ventral axis formation                                    | 0.001386389 | EGFR, MAPK1, NOTCH1, KRAS                                 | 1.471198696 |
| HWAY             | pathway                                                                  |             |                                                           |             |
| REACTOME_PATHWAY | REACT_6900:Signaling in Immune system                                    | 0.001592713 | MAG, NRAS, MAPK1, KRAS, CD34, PECAM1, PIK3CA, NFKB1, CDH1 | 1.270531117 |
| PANTHER_PATHWAY  | P00059:p53 pathway                                                       | 0.001789034 | AKT1, CDKN2A, GADD45G, TP53, PIK3CA, THBS1, TP73          | 1.624912242 |
| KEGG_PAT         | hsa04510:Focal adhesion                                                  | 0.001957264 | EGFR, AKT1, MAPK1, LAMB4, MET, VEGFA, PIK3CA, THBS1       | 2.071273278 |
| HWAY             | pathway                                                                  |             |                                                           |             |
| KEGG_PAT         | hsa04620:Toll-like receptor signaling                                    | 0.002011203 | AKT1, MAPK1, IL6, MAPK14, PIK3CA, NFKB1                   | 2.127799484 |
| HWAY             | pathway                                                                  |             |                                                           |             |
| KEGG_PAT         | hsa04060:Cytokine-cytokine receptor interaction                          | 0.002108909 | EGFR, IL3, IL6, MET, VEGFA, IL9, KITLG, TGFB1, EPO        | 2.230116541 |
| HWAY             | pathway                                                                  |             |                                                           |             |

|                  |                                                                       |             |                                                      |             |
|------------------|-----------------------------------------------------------------------|-------------|------------------------------------------------------|-------------|
| PANTHER_PATHWAY  | P00010:B cell activation                                              | 0.002214285 | NRAS, MAPK1, KRAS, MAPK14, PIK3CA, NFKB1             | 2.007674836 |
| REACTOME_PATHWAY | REACT_604:Hemostasis                                                  | 0.002330368 | MAG, NRAS, KRAS, VEGFA, PECAM1, PIK3CA, THBS1, TGFB1 | 1.854165541 |
| KEGG_PATHWAY     | hsa04630:Jak-STAT signaling pathway                                   | 0.002487246 | AKT1, IL3, IL6, STAT5A, IL9, PIK3CA, EPO             | 2.62539532  |
| PANTHER_PATHWAY  | P00021:FGF signaling pathway                                          | 0.003144809 | AKT1, NRAS, MAPK1, KRAS, MAPK14, PIK3CA, RASA1       | 2.840604013 |
| BIOCARTA         | h_il17Pathway:IL 17 Signaling Pathway                                 | 0.003157025 | IL3, IL6, CD34, KITLG                                | 3.750040719 |
| BIOCARTA         | h_stemPathway:Regulation of hematopoiesis by cytokines                | 0.003157025 | IL3, IL6, IL9, EPO                                   | 3.750040719 |
| PANTHER_PATHWAY  | P04397:p53 pathway by glucose deprivation                             | 0.003458487 | AKT1, STK11, TP53, TP73                              | 3.119958155 |
| REACTOME_PATHWAY | REACT_498:Signaling by Insulin receptor                               | 0.003756119 | NRAS, MAPK1, KRAS, PIK3CA                            | 2.973670175 |
| KEGG_PATHWAY     | hsa04110:Cell cycle                                                   | 0.005068716 | CDKN2A, GADD45G, PCNA, TP53, RB1, TGFB1              | 5.284031958 |
| BIOCARTA         | h_badPathway:Regulation of BAD phosphorylation                        | 0.005426648 | AKT1, MAPK1, IL3, KITLG                              | 6.365799458 |
| BIOCARTA         | h_crebPathway:Transcription factor CREB and its extracellular signals | 0.005426648 | AKT1, MAPK1, MAPK14, PIK3CA                          | 6.365799458 |
| KEGG_PATHWAY     | hsa04062:Chemokine signaling pathway                                  | 0.006278908 | AKT1, NRAS, MAPK1, KRAS, ARR2, PIK3CA, NFKB1         | 6.507599178 |
| BIOCARTA         | h_keratinocytePathway:Keratinocyte Differentiation                    | 0.006958557 | EGFR, CEBPA, MAPK1, MAPK14, NFKB1                    | 8.094303481 |
| KEGG_PATHWAY     | hsa04914:Progesterone-mediated oocyte maturation                      | 0.007248802 | AKT1, MAPK1, KRAS, MAPK14, PIK3CA                    | 7.477850945 |
| KEGG_PATHWAY     | hsa04640:Hematopoietic cell lineage                                   | 0.007248802 | IL3, IL6, CD34, KITLG, EPO                           | 7.477850945 |
| KEGG_PATHWAY     | hsa04210:Apoptosis                                                    | 0.007548465 | AKT1, IL3, TP53, PIK3CA, NFKB1                       | 7.7757735   |
| PANTHER_PATHWAY  | P00036:Interleukin signaling pathway                                  | 0.007614161 | AKT1, NRAS, MAPK1, IL6, KRAS, STAT5A, PIK3CA, RASA1  | 6.753977015 |
| REACTOME         | REACT_216:DNA                                                         | 0.009001    | MGMT, PCNA, XRCC1, ERCC1, ERCC2                      | 6.996374809 |



|                 |                                       |             |                                    |             |
|-----------------|---------------------------------------|-------------|------------------------------------|-------------|
| _PATHWAY Repair |                                       |             |                                    |             |
| PANTHER_        | P00053:T cell                         | 0.009738791 | AKT1, NRAS, MAPK1, KRAS, PIK3CA,   | 8.564577054 |
| PATHWAY         | activation                            |             | NFKB1                              |             |
| cluster5        |                                       |             |                                    |             |
| KEGG_PAT        | hsa04120:Ubiquitin                    | 6.19E-04    | ANAPC1, RNF7, HUWE1, PARK2         | 0.370875716 |
| HWAY            | mediated proteolysis                  |             |                                    |             |
| EC_NUMBE        | 6.3.2.-                               | 0.069187942 | HUWE1, PARK2                       | 14.94398228 |
| R               |                                       |             |                                    |             |
| cluster6        |                                       |             |                                    |             |
| REACTOME        | REACT_1698:Metabli                    | 5.07E-04    | UMPS, ATIC, HPRT1                  | NaN         |
| _PATHWAY        | sm of nucleotides                     |             |                                    |             |
| KEGG_PAT        | hsa00983:Drug                         | 0.001025542 | ITPA, UMPS, HPRT1                  | 0.657964401 |
| HWAY            | metabolism                            |             |                                    |             |
|                 | h_mapkPathway:MA                      |             |                                    |             |
| BIOCARTA        | PKinase Signaling                     | 0.00306271  | MAP3K9, MAP2K4, MAP3K10            | 2.110065352 |
|                 | Pathway                               |             |                                    |             |
| PANTHER_        | P05918:p38 MAPK                       | 0.005195037 | MAP3K9, MAP2K4, MAP3K10            | 3.701051163 |
| PATHWAY         | pathway                               |             |                                    |             |
| KEGG_PAT        | hsa00230:Purine                       | 0.012459659 | ITPA, ATIC, HPRT1                  | 7.749728301 |
| HWAY            | metabolism                            |             |                                    |             |
| EC_NUMBE        | 2.7.11.25                             | 0.030208436 | MAP3K9, MAP3K10                    | 16.18260742 |
| R               |                                       |             |                                    |             |
| KEGG_PAT        | hsa00860:Porphyrin                    | 0.038330298 | COX10, COX15                       | 22.23317069 |
| HWAY            | and chlorophyll                       |             |                                    |             |
|                 | metabolism                            |             |                                    |             |
| PANTHER_        | P00029:Huntington                     | 0.04121774  | MAP3K9, MAP2K4, MAP3K10            | 26.27015356 |
| PATHWAY         | disease                               |             |                                    |             |
|                 | h_p38mapkPathway:                     |             |                                    |             |
| BIOCARTA        | p38 MAPK Signaling                    | 0.045417275 | MAP3K9, MAP2K4                     | 27.61443797 |
|                 | Pathway                               |             |                                    |             |
| BBID            | 100.MAPK_signaling                    | 0.058659218 | MAP2K4, MAP3K10                    | 17.32821753 |
|                 | _cascades                             |             |                                    |             |
| cluster7        |                                       |             |                                    |             |
| KEGG_PAT        | hsa04914:Progesterone-mediated oocyte | 2.08E-08    | CCNB1, CCNB2, MAP2K1, MAPK3, BUB1, | 2.13E-05    |
| HWAY            | maturation                            |             | MAPK9, MAPK11, CDC25C, CDK2        |             |
| KEGG_PAT        | hsa04114:Oocyte                       | 1.46E-07    | CCNB1, CCNB2, MAP2K1, MAPK3, BUB1, | 1.50E-04    |
| HWAY            | meiosis                               |             | CDC20, AURKA, CDC25C, CDK2         |             |
| KEGG_PAT        | hsa04110:Cell cycle                   | 3.96E-07    | CCNB1, CCND1, CCNB2, BUB1, CDC20,  | 4.05E-04    |
| HWAY            |                                       |             | CDK4, CDC25C, MYC, CDK2            |             |
| KEGG_PAT        | hsa05219:Bladder                      | 3.68E-06    | CCND1, MAP2K1, MAPK3, CDK4, MYC,   | 0.00376453  |
| HWAY            | cancer                                |             | MMP2                               |             |

|                  |                                               |             |                                                                           |             |
|------------------|-----------------------------------------------|-------------|---------------------------------------------------------------------------|-------------|
| KEGG_PATHWAY     | hsa05210:Colorectal cancer                    | 7.34E-06    | FOS, CCND1, MAP2K1, BAX, MAPK3, MAPK9, MYC                                | 0.007502731 |
| KEGG_PATHWAY     | hsa05200:Pathways in cancer                   | 1.02E-05    | FOS, CCND1, MAP2K1, BAX, MAPK3, MAPK9, NFKB2, CDK4, MYC, MMP2, CDK2       | 0.010452597 |
| KEGG_PATHWAY     | hsa04010:MAPK signaling pathway               | 1.43E-05    | FOS, MAP3K5, MAP2K1, MAPK3, MAP3K8, MAPK9, MAPK11, NFKB2, MAPK7, MYC      | 0.014636534 |
| REACTOME_PATHWAY | REACT_152:Cell Cycle, Mitotic                 | 1.79E-05    | CCNB1, CENPM, CCND1, CCNB2, BUB1, CDC20, AURKA, AURKB, CDK4, CDC25C, CDK2 | 0.012929573 |
| KEGG_PATHWAY     | hsa04912:GnRH signaling pathway               | 1.79E-05    | MAP2K1, MAPK3, MAPK9, MAPK11, MAPK7, MMP14, MMP2                          | 0.018347497 |
| EC_NUMBER        | 2.7.11.24                                     | 2.02E-05    | MAPK3, MAPK9, MAPK11, MAPK7                                               | 0.012135676 |
| KEGG_PATHWAY     | hsa04620:Toll-like receptor signaling pathway | 2.13E-05    | FOS, MAP2K1, MAPK3, MAP3K8, MAPK9, MAPK11, TLR4                           | 0.02182043  |
| PANTHER_PATHWAY  | P00006:Apoptosis signaling pathway            | 2.68E-05    | FOS, TNFSF10, MAP3K5, ATF3, BAX, MAPK3, MAPK9, NFKB2, MAPK7               | 0.02355655  |
| KEGG_PATHWAY     | hsa04660:T cell receptor signaling pathway    | 3.13E-05    | FOS, MAP2K1, MAPK3, MAP3K8, MAPK9, MAPK11, CDK4                           | 0.032014891 |
| PANTHER_PATHWAY  | P00054:Toll receptor signaling pathway        | 3.16E-05    | MAP2K1, MAPK3, MAP3K8, MAPK9, MAPK11, TLR4, NFKB2                         | 0.02781923  |
| KEGG_PATHWAY     | hsa04115:p53 signaling pathway                | 4.05E-05    | CCNB1, CCND1, CCNB2, BAX, CDK4, CDK2                                      | 0.041438576 |
| KEGG_PATHWAY     | hsa04722:Neurotrophin signaling pathway       | 6.84E-05    | MAP3K5, MAP2K1, BAX, MAPK3, MAPK9, MAPK11, MAPK7                          | 0.069959614 |
| BIOCARTA_PATHWAY | h_mapkPathway:MAPK Kinase Signaling Pathway   | 3.55E-04    | FOS, MAP3K5, MAP2K1, MAPK3, MAP3K8, MAPK9, MAPK11, MAPK7                  | 0.400316292 |
| KEGG_PATHWAY     | hsa05216:Thyroid cancer                       | 6.11E-04    | CCND1, MAP2K1, MAPK3, MYC                                                 | 0.622621821 |
| PANTHER_PATHWAY  | P00052:TGF-beta signaling pathway             | 6.33E-04    | FOS, FOXF1, FOXA1, MAPK3, MAPK9, MAPK11, MAPK7, FOSL1                     | 0.555596842 |
| KEGG_PATHWAY     | hsa05212:Pancreatic cancer                    | 7.67E-04    | CCND1, MAP2K1, MAPK3, MAPK9, CDK4                                         | 0.781138732 |
| KEGG_PATHWAY     | hsa05220:Chronic myeloid leukemia             | 8.95E-04    | CCND1, MAP2K1, MAPK3, CDK4, MYC                                           | 0.91105286  |
| PANTHER_PATHWAY  | P00010:B cell activation                      | 0.001400729 | FOS, MAP2K1, MAPK3, MAPK9, MAPK11, NFKB2                                  | 1.225108429 |
| BIOCARTA_PATHWAY | h_p53Pathway:p53 Signaling Pathway            | 0.003024948 | CCND1, BAX, CDK4, CDK2                                                    | 3.364924295 |

|          |                      |             |                                      |             |
|----------|----------------------|-------------|--------------------------------------|-------------|
| KEGG_PAT | hsa05213:Endometri   | 0.003370738 | CCND1, MAP2K1, MAPK3, MYC            | 3.393288113 |
| HWAY     | al cancer            |             |                                      |             |
| KEGG_PAT | hsa05223:Non-small   | 0.003753245 | CCND1, MAP2K1, MAPK3, CDK4           | 3.77171584  |
| HWAY     | cell lung cancer     |             |                                      |             |
| PANTHER_ | P00035:Interferon-ga |             |                                      |             |
| PATHWAY  | mma signaling        | 0.004182552 | MAPK3, MAPK9, MAPK11, MAPK7          | 3.618778393 |
| PATHWAY  | pathway              |             |                                      |             |
| KEGG_PAT | hsa05221:Acute       | 0.004595499 | CCND1, MAP2K1, MAPK3, MYC            | 4.600275355 |
| HWAY     | myeloid leukemia     |             |                                      |             |
| PANTHER_ | P00034:Integrin      |             | MAP3K5, MAP2K1, ITGAX, MAPK3, MAPK9, |             |
| PATHWAY  | signalling pathway   | 0.005122253 | MAPK11, MAPK7, ITGAM                 | 4.415663351 |
| KEGG_PAT | hsa04621:NOD-like    |             |                                      |             |
| HWAY     | receptor signaling   | 0.005544037 | CCL2, MAPK3, MAPK9, MAPK11           | 5.525680097 |
| HWAY     | pathway              |             |                                      |             |
| KEGG_PAT | hsa05214:Glioma      | 0.005798209 | CCND1, MAP2K1, MAPK3, CDK4           | 5.772273682 |
| HWAY     |                      |             |                                      |             |
| REACTOME | REACT_1538:Cell      |             |                                      |             |
| _PATHWAY | Cycle Checkpoints    | 0.007137442 | CCNB1, CCNB2, CDC20, CDC25C, CDK2    | 5.054206969 |
| KEGG_PAT | hsa05218:Melanoma    | 0.008084875 | CCND1, MAP2K1, MAPK3, CDK4           | 7.964786431 |
| HWAY     |                      |             |                                      |             |
|          | h_RacCycDPathway:    |             |                                      |             |
| BIOCARTA | Influence of Ras and | 0.008275776 | CCND1, MAPK3, CDK4, CDK2             | 8.961786045 |
|          | Rho proteins on G1   |             |                                      |             |
|          | to S Transition      |             |                                      |             |
|          | h_cellcyclePathway:  |             |                                      |             |
| BIOCARTA | Cyclins and Cell     | 0.009291865 | CCNB1, CCND1, CDK4, CDK2             | 10.010086   |
|          | Cycle Regulation     |             |                                      |             |
